# Supplementary material for: Phycobilisome truncation causes widespread proteome changes in Synechocystis sp. PCC 6803
Source: PLoS One. 2017 Mar 2;12(3):e0173251. doi: 10.1371/journal.pone.0173251 (PMC5333879; doi:10.1371/journal.pone.0173251)
Supplement: S1 Table — (XLSX) [file pone.0173251.s004.xlsx]

## Sheet: Sheet1
Peptide	Protein	MinOfMSGF_SpecProb	Charge	Precursor m/z	Spectra#	1_CB	1_CK	1_PAL	1_WT	2_CB	2_CK	2_PAL	2_WT	3_CB	3_CK	3_PAL	3_WT
-.AAAIKPFYFDISDDEIEFFLDEAR.Q	SLR1140	1.15793e-23	3	1037.527	6	31790.2	0	0	0	43113.4	3828.45	3228.51	5106.56	39916.5	2659.1	2268.59	1475.16
-.AAANSWWEIR.I	SLL1909	2.22708e-14	2	674.35034	3	83809.3	79514.3	109247	98891.3	39676.2	53323.1	63904	60055.8	81561	91285.6	113841	100032
-.AAISINVSTVKPLGDR.V	slr2075	5.51722e-17	2	965.0701	25	1.19171e+06	831964	606592	907511	107784	206531	140017	132716	1.11845e+06	1.59638e+06	1.26535e+06	1.10102e+06
-.AAQIIEILSPEEIR.R	SLL0368	2.97886e-15	2	863.49756	8	13428.2	35715.6	79340.3	46321.9	39148.4	76416.9	100243	63037.9	35711.5	34883.8	52814.5	35993
-.AAQIIEILSPEEIRR.T	SLL0368	8.94036e-16	2	941.5473	14	153104	115220	207770	242095	232912	478384	318775	676526	185640	193749	468970	212522
-.AASLSQQINNPER.S	SLR0741	2.86801e-16	2	786.4144	1									66865.2	93645.4	246659	129138
-.ADFVSTSPFGPVLTAM*VTPFNADGGVDYGVAEK.L	slr0550	4.58899e-13	4	916.7085	2	5015.61	4141.27	4557.49	4774.69	8199.62	5459.87	5674.68	3243.91
-.ADLFVGAPVR.L	SSL3451	1.9428e-13	2	594.84674	5	87300.1	136874	180260	113144	461103	820036	1.90443e+06	704864	344145	597821	729407	549130
-.ADPLTPAISDRICK.H	SSR1698	2.34285e-10	3	615.67487	1									18385.3	41709	80293.8	36388.9
-.ADRFSPSDPSLASQLEATLGQLEQVIQK.L	SLL0066	1.98874e-20	3	1106.2623	8	10288.2	572.2	3196.28	1862.36	4184.73	5070.1	1027.36	3546.63	480.57	0	340.3	0
-.ADSITPDSNEHNYAELAQQCQNLASQVQSLSQR.V	SLR1958	9.03773e-22	3	1282.94	9	27480.6	20786.8	20570.9	16854.4	6213.33	13078.9	0	0	8478.39	19260.1	12015.7	5806.78
-.ADSITPDSNEHNYAELAQQCQNLASQVQSLSQRVENLESK.L	SLR1958	4.70377e-20	5	958.87006	6	3060.81	0	0	2895.63	3591.69	22987.4	11569.4	21819.2	14660.7	7620.38	13959.6	8878.13
-.ADSLPNLVDLNFLPFLTEAGEIDPNYEKR.I	SLR1035	3.75573e-10	4	895.4732	1									2997.47	0	0	0
-.ADWQVIEGNITAPK.G	sll1883	9.9542e-18	2	915.0026	8	217903	314183	280682	463974	94127	200877	188270	248541	47501.9	79553.4	60877.2	61530.2
-.AEDTIFSK.I	SLR1234	2.40267e-11	1	1198.6542	4					264834	574589	726102	409578	0	3736.13	8848.71	3797.92
-.AEIQFSK.G	sll1398	4.81183e-10	2	555.82294	9	94436.9	239383	220144	164499	235798	358130	878226	342577	1.00536e+07	2.38764e+07	4.35839e+07	2.29743e+07
-.AEIQFSKGVAETVVPEVR.L	sll1398	4.6037e-21	3	749.7566	1									6889.48	20967	20857.2	9882.61
-.AEISDPGNGDWLDQAWQEDHGQPISLARPDILSGLK.V	SLL1655	3.31117e-14	4	1055.2825	1	7734.71	6784.66	4933.38	6155.71
-.AEITAQLVK.E	sll1261	1.09205e-11	2	631.3923	10	1.21583e+06	2.03346e+06	2.5937e+06	2.56952e+06	89967	247632	460306	229907	1.339e+06	1.85977e+06	3.85462e+06	3.04661e+06
-.AELDAANLM*K.Q	slr0194	1.86348e-13	2	690.37604	15	72581.8	122675	113596	83440.6	1.78269e+06	2.43987e+06	3.95625e+06	1.77141e+06	1.30216e+06	2.27426e+06	4.64481e+06	2.35901e+06
-.AELDAANLMK.Q	slr0194	6.70862e-13	1	1363.7465	6	43456.4	70627.3	57109.6	38128.4	27935.8	44678	83716.6	43411.9	0	0	12441.9	0
-.AESNQVVQAYNGDPFVGHLSTPISDSAFTR.T	slr1655	9.06228e-24	3	1118.2137	75	48208.5	75801.5	7503.37	387455	49839.5	72042.5	108984	117879	78712.5	35862.8	19142.5	76694.9
-.AETLLFAALR.Q	SLL1721	2.07874e-12	2	624.8749	9	990764	460960	460954	827285	78326.4	86941.1	50026.9	82035.4	198473	163621	169365	94920
-.AETYLLDK.L	sll1110	5.3166e-11	2	620.853	3					30523.5	48597.9	55880.7	32690.4	567642	956760	264687	568843
-.AETYLLDKLASVEQTYQELTR.M	sll1110	3.37825e-22	3	920.49854	2	76186.2	45979.7	23490.1	80225.3
-.AFNIESEIINNAAK.L	SLR1859	1.13309e-16	2	911.50085	31	477182	1.03083e+06	542728	834614	493158	1.48433e+06	961660	1.14458e+06	124420	334501	211444	268318
-.AFPILVTGPSR.S	slr0216	6.42704e-12	2	651.38837	3	78663.7	126791	122435	134269	28945.3	46095.3	53080.9	47571.4
-.AGILSPCSESTLTDRYQTTVPDPVR.K	SLR0724	1.32178e-11	3	969.8257	1					8321.31	12834.8	10849.6	16299.6
-.AGSLFADASK.R	slr0710	2.16504e-13	1	1254.6926	5					44112.2	87999.3	190902	71245.1	434341	1.12813e+06	2.3557e+06	1.18361e+06
-.AGSLFADASKR.L	slr0710	1.81544e-14	3	470.93478	2					98052.9	158880	291606	193365	73276	138893	191596	115690
-.AGTEISAITTK.L	slr0899	3.85704e-14	2	690.4017	7	44693	85859.9	311677	112540	548012	2.62236e+06	1.51205e+07	3.28353e+06	125374	383802	1.96774e+06	456388
-.AGTEISAITTKLLEAK.K	slr0899	2.37217e-16	3	693.4191	1					19569.5	23044.5	87738	33590.8
-.AIATINPATGQTVQTFIAHSQVEVNAK.L	SLR0370	8.21116e-28	3	1033.2347	5	62722.4	37848.5	74883	57372.3	7343.18	9871.5	17019.5	9266.47	20529.4	22033.8	20481.3	17597
-.AIFSPVNAVTDIIPQLEK.I	sll0404	1.68174e-21	2	1122.1476	16	43555.5	34937.4	35972.4	43548.4	27926.5	45612.4	57929.1	22713.7	39814.4	51982.3	88979.3	34093.9
-.AIGEQTHPQASKDQAIVDR.L	SSR2551	7.93899e-17	3	784.7541	1					11214.8	14566.9	20162.6	23296
-.AINFTELR.E	slr0435	6.85634e-11	2	554.3178	3					621370	759096	1.16937e+06	603384	314042	346037	525717	354390
-.AITPTQLLDWK.R	slr0526	1.24431e-14	2	787.4649	8	440039	312852	558815	310237	62361.6	61567.9	69925.2	43700.6	62889.6	58730.3	58830.4	56406.3
-.AITPTQLLDWKR.Q	slr0526	1.61331e-15	3	577.3446	2					49693.7	57122.2	115986	76019	65000.2	112046	113718	115411
-.AITTAASR.L	sll1580	8.7628e-11	2	467.77615	5	236.5	255.08	77.58	7586.86	722.59	707.2	450.9	19069.6	259.87	708.57	295.49	29758.8
-.AKEDRPSLK.D	SLL0185	3.77038e-11	3	492.63324	2	448.76	382.13	257.12	237.99	833.87	996.8	1139.63	929.6
-.AKEDRPSLKDMTLR.Q	SLL0185	7.88655e-10	3	698.06635	1									20975.3	54565.9	29111.8	17197.3
-.AKSNATKPLTGEALLEK.V	SLL0822	5.18476e-16	2	1174.2023	9	55036.6	175809	70985.5	163815	62230.4	117759	114206	154666	216498	614267	387058	496142
-.AKTVVSPDTIALPR.T	sll0078	1.06774e-16	3	586.02356	1									56666.1	117589	104498	67405
-.AKVLVSDSIDQVGIDILK.Q	sll1908	3.63303e-20	2	1173.2041	4	33263.7	75193.8	67603.4	138861	12956.6	26233.1	10400.8	72034.7
-.ALITVQSLR.K	SLL0912	2.61092e-11	2	572.8607	1									60187.7	76654.7	51542.7	54197.2
-.ALPLLNYAPK.S	slr2051	4.88013e-13	2	694.4322	50	1.06559e+07	180162	158126	1.7029e+07	1.23083e+07	340991	248260	1.94085e+07	2.88121e+07	170805	105267	4.29056e+07
-.ALPNIADAR.K	ssl3436	9.17072e-12	2	542.8154	9					1.33379e+06	3.52329e+06	5.12583e+06	3.26042e+06	766161	1.59617e+06	2.21338e+06	1.87929e+06
-.ALPNIADARK.L	ssl3436	1.13951e-12	3	452.9443	1					52307.2	115801	293806	298621
-.ALVHSGVIENYIQR.V	SLR1809	4.20703e-15	2	871.9849	3									124836	165845	164400	120988
-.ALVLTFLGK.G	SLR1794	1.9988e-11	2	625.4108	3	96062	21873.5	41239	35787	50015.5	33672.3	29030.8	28800.4	169878	49698.8	75111.8	52752.9
-.ANILLVDDENALTEPLSK.A	SLR1837	5.83786e-21	2	1122.1224	6	25019.1	61153.6	48927.4	33608	58266.9	142451	178435	112831	59478.1	98555.4	94846.8	71799.2
-.ANLETYVR.M	SLL1381	1.88629e-11	2	555.3065	4	51031.3	85616	87544.7	80087.1	311945	561580	1.16544e+06	526107	342166	722419	1.37369e+06	883010
-.ANLFPALR.T	SLL0171	8.69312e-11	2	523.3162	2					88439.8	179250	209768	118783	88243.9	167922	146475	114110
-.ANPVTLPQTFLLLGSGELGK.E	slr0861	7.65819e-24	2	1172.182	9	29195.7	16336	31524.9	19903.6	23742.5	31717.8	33059.2	21852.9	30004.7	25508.3	26836.2	23732.9
-.ANPVTLPQTFLLLGSGELGKEFTIAAQR.L	slr0861	2.70176e-13	4	815.7138	1	3928.04	842.31	0	1933.59
-.ANQDLIPVVVNGAAGK.M	sll1058	9.34749e-10	2	928.0318	1	6144.02	7643.93	9217.7	4646.63
-.ANSPQCLLVGSLEPYSGK.S	SLR0039	2.09431e-21	2	1104.5819	18	132816	106284	224894	122112	35748.4	261399	407244	139163	126906	181077	385114	202274
-.ANSTESGSLQSSSTVK.V	SLR0883	1.90516e-16	2	935.98413	1	144.07	168.7	90.37	131.82
-.ANTTKGADAIDQAIAAGIDFDGSAIPEAK.L	SSR1528	4.87338e-19	3	1088.905	18	18478.3	11855.2	4760.38	79100.3	10344.6	9964.92	8092.79	63698.6	10615.8	20719.6	15766.3	44402.5
-.ANVIVIGAQWGDEGKGK.I	sll1823	4.5735e-16	3	725.4128	3	303545	273111	162209	227629	84094.4	137079	47597.8	91788.3	66561.5	75557.1	33809.2	41476.5
-.APQVDVLINK.Q	SLL1479	2.69177e-13	2	692.9233	3	165882	152950	206688	130878	758560	1.4442e+06	1.27438e+06	1.04519e+06
-.AQFQIECVESSTR.K	sll1818	4.17009e-18	2	849.9158	14	9.17586e+06	1.14701e+07	1.39539e+07	1.72091e+07	5.58187e+06	1.13516e+07	1.07922e+07	1.22382e+07	2.78379e+06	5.79869e+06	5.04533e+06	5.08946e+06
-.AQFQIECVESSTRK.N	sll1818	2.88313e-15	2	986.0126	2									86661.8	195017	141154	127035
-.AQTINLQLEGMR.C	sll1920	5.32904e-14	2	759.4164	1	89467.6	123389	120668	132502
-.AQVIVENLYK.S	SLR1224	1.89423e-13	2	732.9352	6	181632	450241	435475	366024	554318	1.57254e+06	1.86074e+06	1.29021e+06	760545	1.87846e+06	2.09052e+06	1.52784e+06
-.ARTPQEVLK.W	slr1756	2.24652e-10	3	443.9406	1									7532.11	28904.4	118026	25496.9
-.ASINDNYLK.L	SLL0480	1.55682e-12	2	663.3685	6					1.29546e+06	1.67996e+06	1.54451e+06	1.93863e+06	1.99954e+06	2.15121e+06	2.64381e+06	3.89725e+06
-.ASPYNAGEIEQK.W	sll1074	2.81904e-16	2	797.9194	6					65322.4	107150	88342.6	134440	251432	372595	275039	605813
-.ASSTQTNVTIAPK.T	SLR1261	2.8291e-17	2	803.4562	2	2116.73	3777.6	2807.96	5592.86					25494	42106.9	56576.7	68203.1
-.ASTDFKDYYQILGVTK.T	slr0093	6.0598e-17	3	761.08636	4	23198.5	17596.1	27950.3	23228	24620.8	29765	36988.6	20124.2	71686.5	141422	69098.1	72893.3
-.ASTDTISDM*LTR.I	sll1809	4.2856e-16	2	735.8651	13	685449	1.19566e+06	1.05693e+06	1.15467e+06	1.97891e+06	4.36868e+06	6.1655e+06	3.72626e+06
-.ASTDTISDMLTR.I	sll1809	3.60573e-16	2	727.8678	10	1.87679e+06	4.59041e+06	3.63434e+06	3.60274e+06	2.73191e+06	7.06681e+06	8.46243e+06	5.71589e+06	101790	191741	246770	146571
-.ASTNISDREK.A	sll0569	1.01332e-13	3	470.25967	1									917.7	514.02	2993.92	6593.04
-.ASVPFTDREMQK.A	SLL1562	1.24552e-12	3	566.3019	1									166570	319064	222767	338265
-.ASVSFEQVTK.Q	slr0747	3.82404e-14	2	692.3893	1					37443.6	92264.1	174909	78226.8
-.ASVSSQPGNSPSLSVPESSIVSSPQQISAQR.S	SLL0639	3.23238e-10	3	1085.8888	1					0	0	0	0
-.ATALETNQPAPTFSAPNAEGK.T	SLR0242	3.4857e-22	2	1202.1212	13	28801.2	31694.6	162667	37439.8	0	4781.1	37387.7	7223.51	11158.4	0	62738.4	0
-.ATFVAQVK.D	slr0162	1.51426e-11	2	576.3536	3	229048	425391	344540	439772	551522	1.34268e+06	1.40258e+06	1.38908e+06	166962	332086	272379	323746
-.ATFYNLHPETPQQR.T	SLL0216	1.28086e-16	2	923.4703	3					0	7450.02	0	0	36171.6	79442.7	98540.1	76681.2
-.ATIAEINDKLR.R	SLR0689	6.65047e-14	3	511.30548	3	13201.3	33062.6	56325	44222.8	234833	740360	1.69205e+06	1.26115e+06
-.ATINIGIPEADR.I	SLR1894	6.13465e-14	2	707.3963	14	1.66393e+06	281300	537430	355920	6.79492e+06	2.51199e+06	2.37319e+06	1.12376e+06	647528	76009.3	142202	156740
-.ATINIGIPEADRIK.I	SLR1894	8.7728e-17	3	600.3601	11	1.16018e+06	297953	572784	550388	781618	480237	409065	366880	1.20841e+06	235435	542017	386963
-.ATITDSDLQELK.D	SSL1328	2.55068e-14	2	811.4481	1									141639	258172	278959	294560
-.ATITDSDLQELKDLINGLDK.K	SSL1328	9.46661e-12	3	879.1538	7	41293.7	62525.6	73918.5	87797.3	50583.1	58209.8	63441.6	87146.9	32421.3	29004.9	56357.6	31199.7
-.ATITDSDLQELKDLINGLDKK.I	SSL1328	1.71586e-14	4	727.664	11	195477	325516	318831	373522	26106.8	36571.7	53473.8	76479.1	68640.8	102731	127289	77226.7
-.ATLQDSRDKNVLGGDLK.C	SLR1628	3.1807e-12	3	754.7637	1									27537.3	96901.2	142887	90693.3
-.ATM*IPGEIITPEGDIELNVGR.S	sll0420	5.71738e-20	2	1193.1263	19	24274.4	44647.6	70210.2	58152.5	16101.1	19000.9	57132.8	28307.6	12736	16232	28037.7	13856.1
-.ATMIPGEIITPEGDIELNVGR.S	sll0420	2.57519e-25	3	790.42377	22	33614.2	71823.7	131441	93586.8	21838.2	49043.8	73268.2	11993.5	18900.2	25385.8	31190.7	23266.9
-.ATQNPNQPVTYPIFTVR.W	smr0006	7.05443e-21	2	1045.5618	7	124401	117684	170682	100976	16096.6	20756.3	32855.3	11437.3	36369	41508.4	44373.8	32630.6
-.ATTADDVWQILAELAASQK.Q	SLL2015	9.30079e-16	3	773.421	3	19727.8	0	8967.28	0	5140.42	2290.09	1278.33	2003.12	6740.39	4580.22	4739.22	4291.57
-.ATTADEVWALLGELIESQK.E	SLR1541	3.20665e-19	3	788.1001	3	25380.7	783.65	1264.37	3097.47
-.ATTADEVWALLGELIESQKETDRR.M	SLR1541	4.16419e-13	4	755.65765	1	5141.27	0	0	0
-.ATTIPVPLPQSPYQVQIVPGGLAAIADHLAPLGLGK.K	slr2130	5.037e-13	3	1297.7512	1					0	0	0	0
-.ATTVQLSDQSLR.Q	slr0473	1.64794e-10	2	732.40375	1					110012	311260	443828	245973
-.ATVLDLQPIISLNR.G	SLR0981	1.71248e-16	2	849.0093	4	56471.6	46714.6	77621.6	68751.4	21491.6	30947.7	32823.4	25958	32191.4	41817.9	52543	31545
-.ATYYYALASQK.F	slr1780	1.93758e-15	2	783.92255	14	355232	520415	493708	536827	163220	323060	335320	345114	125132	252450	193069	160496
-.AVCPTCNHTNPEGAIQC.E	SLR0298	1.95195e-10	2	1036.9576	1	721.18	803.65	744.19	512.34
-.AVTSPWFR.A	SLL1433	5.37646e-12	2	554.3074	1					62401.4	73107.2	147581	69001.7
-.AYALPNLPYDYTALEPCISK.S	slr1516	5.97781e-22	2	1294.1729	89	434575	3.12805e+06	2.7593e+06	3.37212e+06	1.57117e+06	1.47931e+06	4.00214e+06	4.2359e+06	1.41816e+06	1.86462e+06	5.05624e+06	2.69734e+06
-.AYDLDLR.I	slr1282	9.43486e-10	2	505.27472	1					39585.8	60063.8	94414.8	48718.7
-.DSTLGLEIIEVVEQAAIASAK.W	slr2094	6.01917e-23	2	1223.1956	12	4703.7	2621.56	0	2223.18	4547.89	0	663.22	2937.74	48198.1	2264.25	3763.32	30034.9
-.FEDFEQDALFTPDQLLENR.G	SLR0650	2.67931e-18	2	1236.0983	1					0	0	0	1192.12
-.GDTITLLSR.R	SLR0918	1.72771e-11	2	560.32715	2					172163	332055	481494	220626	94942.4	89363.6	140404	100713
-.GEQTPYQTLGISEEATFEDIQAVK.T	SLR1918	2.65631e-22	3	981.50134	5	17564.9	12207.9	21427.5	32837.2	20563.8	24756.1	24271.5	17656.3	7527.48	7464.18	9226.1	6863.8
-.GFFDLFGK.K	SLL1394	1.25543e-11	2	609.8455	6	513908	117885	175035	243800	251447	157991	97064.2	135899	137741	78861.3	74677.9	70381.3
-.GFFDLFGKK.T	SLL1394	5.46931e-13	3	497.62692	3					181589	143278	70053.1	170569	186601	103514	110309	83700.1
-.GGQTLAESSQVLR.Q	sll0226	6.44868e-15	2	745.4089	3					102368	122502	116893	82205.5	589399	602616	350389	510208
-.GGQTLAESSQVLRQEVLGAR.R	sll0226	4.94505e-10	3	748.41205	1					18624.2	24575.8	26702.9	44031.8
-.GKPTGFLEYTR.E	sll1027	2.16072e-15	2	778.9367	5					452970	1.02748e+06	1.05142e+06	832313	219451	465422	468869	360034
-.GKVVGIDLGTTNSCVAVM*EGGKPTVIANAEGFR.T	sll0170	1.29489e-20	4	950.0026	11	21339.4	16850.3	22872.8	19792.7	7479.8	74908.6	19740.1	37674.6	0	4808.5	4201.59	2916.49
-.GKVVGIDLGTTNSCVAVMEGGKPTVIANAEGFR.T	sll0170	1.14237e-22	4	945.75903	8	78967.8	89277.2	62969	131537	14433.5	21702.1	4101.04	22857.1
-.GLGSSSQENLLNLIDR.Q	SLL0993	7.63954e-17	2	930.5014	1	7164.29	7394.62	29194.4	14819
-.GLLVNGIWQDQWYDTESTGGR.F	SLR0605	2.37989e-18	2	1270.6141	8	8767.94	7182.43	23331.9	23818.3	4888.93	5401.63	2696.23	4109.66	10670.8	6974.29	8575.61	0
-.GNTFGSLFR.I	sll1747	9.58861e-13	2	571.80756	4					833094	953072	1.2741e+06	1.65352e+06	1.05137e+06	1.29619e+06	1.54363e+06	1.65023e+06
-.GQM*NTADLLVQCLENEDVEYIFGVPGEENLHILEALK.N	sll1981	5.28137e-10	5	901.8588	1					2568.8	788.87	491.99	815.55
-.GQPSDLTESTLR.F	SLL1888	4.18267e-15	2	724.3779	1					642556	1978855	2528245	1911265
-.GQTPTIAINHLGCEK.N	SLR0082	2.55136e-18	3	643.0145	5					213923	278445	245225	316291	99209.3	84125.1	120290	183426
-.GSALVIDDSSTER.S	sll0039	1.05232e-16	2	747.3825	8	42004.8	76124	80233.2	90993.9	193900	280570	411182	255186	43493.1	74114.1	123517	92081.9
-.GSEYQGQFEQKFEEGK.A	SLR1052	3.71779e-21	3	775.05566	1	57707.9	116701	141433	95961.9
-.GVTWELDFYSRPLLDDEEK.K	SLL2002	2.40068e-17	3	867.445	3	97314.2	10731.6	11476.9	21109.5					74195.3	16911	12834.3	9260.99
-.GVTWELDFYSRPLLDDEEKK.V	SLL2002	4.81702e-17	4	718.63214	1					32085	19534.7	12448.2	16142.1
-.GYIAVVDYDM*GNLHSVCK.G	slr0084	2.72439e-13	3	782.3887	1	44772.7	31315.7	37627.5	46431.4
-.GYIAVVDYDMGNLHSVCK.G	slr0084	3.36248e-25	3	777.0571	8	262124	141030	147476	269836	168762	214288	111358	214627	79392.6	80409.6	83963.1	48746.5
-.IAPDSSPHPLEIAPVLQQK.L	SLL1054	1.66506e-18	3	776.77625	1									41582.1	72958	134444	77396.7
-.IQQQTYLNVADNSGAR.K	sll1806	7.62413e-20	2	961.49445	1	26417	25368.6	34155.5	38194.7
-.ISPIGGLSQALHSPSDSIFVASLPR.D	SLL0219	8.24878e-18	3	898.497	3	8512.4	13351.3	6613.95	27046.1	8922.21	39567.5	22451.9	53999.4	23197.1	40943.1	18667.7	45254.3
-.KTPLTEAVSTADSQGR.F	sll1578	7.2326e-18	3	650.356	6					531410	64761.7	109178	1.04549e+06	748310	2155.59	11961	1.5603e+06
-.LNPNLAEIELSQDDYQR.Y	sll1536	5.44446e-20	2	1081.5446	2	29603.3	63264.3	29843.1	76044.8	14006.7	22362.2	23366.1	30832
-.LSKVPATIEEIAAR.E	SLR0752	9.4697e-17	3	596.02795	1									19411.8	37067	29941.5	21060.1
-.M*DAMEFFR.N	slr2049	2.35971e-12	2	603.7735	2	28860.3	33737	47757.5	42856.6	31578.9	48758.4	71162.3	57020.3
-.M*DDLTIYTSPEEEELTAK.K	SLL0909	1.20718e-15	2	1195.0814	1	0	9012.85	15570.9	0
-.M*DDTNTTLLLK.R	SLR1600	2.3089e-14	2	784.9273	2					309532	418452	650449	428577
-.M*DIASWNVNSVR.S	SLL1854	4.14554e-13	2	776.3885	1									37634.2	77528	99211.7	67648.3
-.M*DIPNTTATIATIPQAPAGFR.S	SLR0321	5.42056e-14	2	1173.6155	1					0	6479.16	10522.7	3586
-.M*DLLEYQAK.E	SLL1023	3.22144e-12	2	707.8769	1					58213.8	126455	202354	114766
-.M*DLSRIPAQPK.A	slr1622	3.71554e-13	3	520.6314	4	2358.1	14959.1	4638.68	17119.6	16118.4	31616.5	52107.1	80136.5	68862.9	452315	822891	440978
-.M*DQSLTQDRPLAAVFR.R	sll1423	2.3352e-13	3	670.0185	2									126986	242543	179212	161065
-.M*DSTLGLEIIEVVEQAAIASAK.W	slr2094	5.71891e-25	2	1296.7101	104	143097	12438.9	15329	55732.9	145285	64478.8	19840.1	69873.2	186821	90731	70678.8	65360.4
-.M*DTFDAIYQR.R	SLR1719	4.09054e-14	2	710.33856	5	196453	170092	448505	251557	143908	165882	485376	237024	110767	174785	380004	198715
-.M*EELLELK.Q	sll1630	5.94903e-10	2	654.8705	1									11696	16181.7	14262.4	18427
-.M*EFSQLVER.L	SLR0776	1.6326e-12	2	649.8295	1					105028	379273	225595	229019
-.M*EIQLINIGFGNIVSGNR.V	SSL2874	9.25974e-17	2	1068.0737	5	22259.7	0	11144.5	15030.1	34052	27150.4	22515.9	27748.5	7110.32	0	6980.47	2586.84
-.M*ELEHPDDLYYLDSHEYVR.F	SLR0879	7.10187e-24	3	862.06323	3	90089.3	49945.1	40579.2	38115.3					22727	41901.9	20222	23584.2
-.M*ENPVPITPSETIVDSCQR.L	SLL1584	1.27434e-13	2	1167.0647	4	0	5514.99	6762.97	0	0	8955.13	9005.86	5911.78	1636.15	4862.49	10071.3	5687.21
-.M*EQPM*KPTVIITGASSGVGLYGAK.A	slr0506	5.30263e-16	3	967.1892	2					0	23601.8	13349.3	0	0	44384.7	0	19999.3
-.M*ETTNLPM*EQIR.Q	SLL1504	4.52443e-11	2	819.9006	1					7043.53	15922.6	17927.2	12678.8
-.M*EVFDPTPPPWVEDTVHAR.G	SSR1552	1.56632e-17	3	795.05554	1									16662.8	16352.2	16740.2	10139.9
-.M*FDVFTR.V	sll1577	8.42252e-11	2	538.2726	28	467744	34013.6	19824.5	915591	5.16754e+07	1.18049e+06	471886	2.65639e+08	4.61644e+07	167342	114393	1.4592e+08
-.M*FDVFTRVVSQADAR.G	sll1577	1.6006e-12	3	634.6599	1					3818.8	3982.42	6456.42	43956.4
-.M*FEDFEQDALFTPDQLLENR.G	SLR0650	7.05341e-24	2	1309.6158	5	23505.6	10489.8	17579.2	14301.1	9280.13	9494.83	7087.49	8632.67	5425.05	8236.72	4785.37	3827.19
-.M*FIPLDFYR.I	SLL0169	1.08815e-12	2	681.35516	3					70280.1	101291	133848	120414	28967.3	33455.4	25249.3	22659.5
-.M*FLEELKPVTR.E	SSL0294	1.0645e-14	2	833.97614	12	332439	360068	507558	450397	767512	1.88228e+06	2.26125e+06	1.45604e+06	122203	235512	258243	173210
-.M*FNNILK.Q	sll0520	5.09268e-10	2	592.3388	3					1.26596e+06	2.03191e+06	3.06125e+06	1.99139e+06
-.M*GGRAWEHDQGKWQPYTSGKK.R	SSR2254	8.04673e-10	3	1014.18646	1					0	0	0	0
-.M*HDSPEASSPAPTPHPETTR.T	SLR2074	1.23785e-13	4	577.0212	1					169.88	168.52	159.14	144.39
-.M*HPVVSSAEYR.Q	SLL0136	2.18474e-15	3	479.24237	1									1468.26	1665.97	2456.48	2155.81
-.M*IAPDSSPHPLEIAPVLQQK.L	SLL1054	9.30358e-19	3	825.7895	4	15783.9	10491.8	24833.2	23705	66166.2	107120	192518	107590	63372.6	63087.8	101110	65320.4
-.M*IDQETDGIEK.L	slr1942	1.61451e-14	2	791.8959	2					26660	39794.2	36389.1	21550.3	84578	95579.1	45689.3	83018.5
-.M*IDQETDGIEKLETGIPGFDFLSDGGLPLGR.A	slr1942	1.39126e-15	3	1208.9503	3	13284.5	6159.78	2259.94	7362.08					5677.07	4054.84	3325.99	1906.49
-.M*IFPGATVR.V	SSL0352	1.52055e-10	2	576.32104	1					133945	371605	432017	315828
-.M*IPSDLFLR.D	SLL1647	1.48286e-10	2	626.3488	1									25035	45715.6	60293.6	31699.8
-.M*IQQQTYLNVADNSGAR.K	sll1806	4.13373e-22	2	1035.0128	15	195883	347762	375459	278682	13087.6	46951.1	67717.9	37481.9	249441	320956	361366	261756
-.M*ISLDQVK.Q	SSR3122	9.21815e-11	2	619.3555	1									69526.5	107537	160969	120323
-.M*ISTTSLFAPVDQDLR.L	slr0611	7.01585e-16	2	977.5084	1									22855.3	30920	26928.3	22931
-.M*IVIYHNPDCGTSR.N	slr6037	2.05856e-12	3	608.2937	1									42914.7	74018.4	75641.1	70548.3
-.M*IYDIFM*PALSSTM*TEGK.I	SLL1841	8.20616e-19	3	791.0548	13	56216.2	68113.3	98718.5	58190	31688.9	53024.3	92663.3	59179.5	33141.5	43525.4	38361.7	30285.1
-.M*IYDIFM*PALSSTMTEGK.I	SLL1841	7.89799e-20	3	785.7221	12	75827.5	84621.6	91956.2	87596.3	21661	44246.5	47660.3	42224.4	44667.6	61416.2	62246.4	51407.2
-.M*IYDIFMPALSSTM*TEGK.I	SLL1841	1.71265e-21	3	785.7229	19	44823.4	49437.7	45469.4	44087.2	25047.7	49897	41457.3	42634.4	26917.6	29771.3	30212.6	24841.9
-.M*IYDIFMPALSSTMTEGK.I	SLL1841	1.24712e-23	2	1170.0846	17	30163.3	29294	40918.9	44377.1	33323.1	46573.7	47938	50691	32816.9	46156.2	40877.9	24923.3
-.M*KSPQAQQILDQAR.R	SLL0626	6.43404e-11	3	640.0183	1									18973.3	23951.3	32805.9	19893.7
-.M*KTPLTEAVSTADSQGR.F	sll1578	3.65636e-18	2	1048.5479	101	6.30219e+06	878808	677108	3.18966e+07	3.4254e+06	937719	1.25101e+06	2.98644e+07	5.79705e+06	1.1516e+06	1.10189e+06	2.89103e+07
-.M*LALIDTVK.S	SLR0651	2.06157e-11	2	654.39636	4	96542.5	118836	210652	183764	127773	200469	262583	189168	57644.7	85724.1	117851	76395.3
-.M*LDEQAK.K	SLR0001	6.17737e-10	2	569.8045	1	801.52	1412.7	2673.36	800.79
-.M*LDIQAIADHAHQGAAALGIK.Q	SLL0887	1.3719e-20	3	817.1128	6	35613.4	30043.9	20001.7	32328	83017.9	115835	23224.2	92790.2	52771.6	112965	72842.6	34447.8
-.M*LDKTTLQER.I	SSL3382	1.15463e-10	3	513.61896	2					11666.7	24352.4	52121	25576.4	14160	30754	83334.8	30756.5
-.M*LELHQFELSQYSEK.V	SLL1545	2.68442e-18	3	729.3734	4	76042.1	65425.2	97144	65982.2	115900	295308	199349	182253	69941.4	177560	106969	93290.6
-.M*LEQDVVIVGGGLAGCR.A	SLR1233	2.12975e-17	2	967.5011	10	120708	87062.1	140310	180020	79465.7	121893	123675	156267	40774.9	73939.2	83349.2	55251.3
-.M*LGQSSLVGYSNTQAANR.V	ssl3093	4.33702e-21	2	1029.014	13	56319.8	74152	42722.5	601214	17514.5	0	3667.36	478704	0	0	0	75927.6
-.M*LICLQCSAENPNR.N	SLL1033	1.90608e-14	2	933.4417	4	64694.5	72654.8	71377.4	73280.3	41503.8	86183.6	143511	100900	26470.2	43693.9	71115.6	52824.6
-.M*LNPNLAEIELSQDDYQR.Y	sll1536	2.95558e-22	2	1155.0624	16	205726	189443	205639	303678	74647.3	163233	220288	199967	12757.9	27212.6	23319.6	37077.7
-.M*LPLPLIANGKGFIR.A	SLL1262	3.74348e-10	3	648.7228	2					20176.2	46763.5	71038.9	68909.7	104616	327586	348150	237699
-.M*LQFQIQNDSEIPASK.Q	SLL1961	2.69175e-15	2	1077.0604	2					4643.57	7225.1	10295.5	8818.43	0	5063.99	0	6899.14
-.M*LSKVPATIEEIAAR.E	SLR0752	1.61803e-18	3	645.03796	21	265423	1.03628e+06	629872	1.24196e+06	513266	1.20408e+06	1.15243e+06	2.21596e+06	365738	1.59693e+06	1.55866e+06	1.3719e+06
-.M*LSLGLEDK.V	slr1994	1.79169e-11	2	655.3647	1					24414.9	22441.2	22264	14564.7
-.M*LTIALPK.G	sll0900	3.13402e-10	2	595.8743	2					31471.2	54427	56656.3	44467.8	132055	247584	261669	250193
-.M*LTSTTDIVQGR.T	SLL1118	1.17363e-15	2	741.3911	4					65441.2	93767.9	196532	107295	101030	225465	279515	264350
-.M*LTTDAVLTVLRPVQDPELQK.S	SLR0067	1.15697e-16	3	891.1692	8	79018.3	44578.2	66563.1	79894.4	135918	246244	171813	187905	17480.7	30628.7	15194.3	19714.9
-.M*LYLAEIK.K	SLR1301	2.03366e-10	2	642.8765	2					67809.5	112152	96691.6	104031	63687.7	92494	121298	74552.8
-.M*M*TDNEVFKEGLAGVPAAK.S	SLL0401	2.21612e-10	3	824.4315	1	35654.4	114787	69351.8	75703.5
-.M*M*TLEPNQEQLK.K	slr0943	1.06832e-15	2	891.4532	1					8144.83	7685.75	31960.6	13323.4
-.M*M*TLEPNQEQLKK.M	slr0943	8.50848e-18	3	685.36975	4					27484.7	37748.9	81585.8	51131	35441.8	65055.9	115609	75537.7
-.M*MTDNEVFK.E	SLL0401	4.23551e-13	2	709.84705	1									225467	285885	234195	271220
-.M*MTDNEVFKEGLAGVPAAK.S	SLL0401	5.06885e-15	3	819.43445	3					81430.9	215452	310327	178222
-.M*MTLEPNQEQLKK.M	slr0943	2.33892e-16	3	680.03784	3					59724.9	107552	187465	104753	85581.6	143776	321213	156693
-.M*NAVAACFNALR.Q	slr0966	9.57122e-11	2	749.3752	2					33736.8	68384.8	95107.3	80983.4	33219.6	65855.9	50082.3	52394.7
-.M*NAVLLVEDSSSQR.E	SLR1042	4.40462e-14	2	854.9368	1	48111.5	53498.1	63249.2	82173.3
-.M*NIPILDLKPQYQR.I	SLR1666	2.31975e-12	3	678.38684	1									64870.3	100341	85281.9	57920.7
-.M*NITSPLSAPSHQYPDALGR.F	slr0543	7.37554e-24	3	772.38965	4	32767.8	38832.6	42622.8	44608.8	7270.43	13099.3	14062.4	13219.2	101221	180887	157836	159861
-.M*NKGELVHAVTDK.A	SLL1712	7.83407e-17	2	945.52386	34	510021	584082	280581	379851	1.39691e+06	2.37951e+06	1.89367e+06	1.64748e+06	1.72051e+06	2.92626e+06	837030	1.79779e+06
-.M*NLSELSPK.D	sll1813	3.33643e-12	2	661.8648	4					168171	412327	678668	352006	727719	1.47854e+06	1.40208e+06	1.30257e+06
-.M*NLSELSPKDGAK.K	sll1813	6.49209e-14	3	613.3394	2					25103.2	39079.3	44446.6	70335.6	33396.8	67596.4	285157	123030
-.M*NNYTKDDDGRLNNFAVEPK.I	SSL1498	4.56558e-14	4	698.34814	1	8342.9	41436.1	25431.9	28853.8
-.M*NPLDSFK.S	SLR1619	1.06357e-11	2	628.33246	2					107218	217416	227713	207782	189629	337636	370033	465010
-.M*NPLDSFKSQVEANVTGLGADKDIQALSR.I	SLR1619	1.94872e-17	4	888.97314	1					5223.92	9779.49	9668	35201
-.M*NQTNLDFLATSDPALAAIIDR.E	sll1931	2.93521e-22	2	1275.6555	3	2661.6	0	0	3047.75	3700.77	7298.62	2862.46	2322.78	3334.22	5698.54	4116.46	2138.62
-.M*NQTNLDFLATSDPALAAIIDRELQR.Q	sll1931	1.1688e-14	3	1026.2029	3					23137.9	12102.5	3703.02	17546.7	35861.8	9432.05	26760.5	13520.5
-.M*NTIYEQFDVVIVPVPFTDR.Q	SLL1130	3.66775e-20	2	1272.1564	1									7480.99	0	0	0
-.M*NTPQVSFIPLK.N	slr7060	9.64306e-10	2	839.97943	1					15859.5	20186.8	22592.8	19004.3
-.M*NVIPTTIADVLILEPK.V	slr1933	1.06833e-19	2	1086.1342	9	50359.7	21707.1	27964.1	38967.8	16119.9	12684.6	6137.71	19488	45108.9	34913.2	47471	39650
-.M*PGDYYQTLGVTR.D	sll0897	6.93373e-12	2	830.909	1									27616.9	64697.9	41317.2	61557.6
-.M*PPQFPLATVGALVTAPDGR.V	SLL1537	3.99371e-12	2	1099.5935	1									9133.25	15604.9	17004.2	9809.68
-.M*QDAITAVINSADVQGK.Y	slr1986	1.47038e-21	2	1033.0443	112	3.86305e+06	9325956	579420	4.68818e+06	1.86782e+06	6.19815e+06	318138	3.82326e+06	2.18154e+06	6.53886e+06	743272	4.03409e+06
-.M*QDAITAVINSADVQGKYLDGAAM*DKLK.S	slr1986	1.04885e-17	4	894.4771	1									2852.77	13515.9	1116.44	11600.3
-.M*QDAITAVINSADVQGKYLDGAAMDKLK.S	slr1986	5.64053e-20	4	890.4796	4	5128	13424.9	0	13893.8	4634.05	12250.9	4385.8	16349.2	9941.73	181777	68824.1	88128.6
-.M*QEELSVLLK.A	SLR0374	1.08271e-12	2	747.4275	2					87079.2	150355	156356	144999
-.M*QEFDKSISFDGR.D	SLL1043	4.86108e-16	2	932.4604	5	77944.5	150735	157288	199157	53368	110239	327503	347221	0	208954	635161	256299
-.M*QEFDKSISFDGRDIR.L	SLL1043	4.79502e-10	4	562.7871	1									17846.2	46980.8	58383	29682.7
-.M*QLSPQEKDK.L	slr1256	1.23968e-10	3	551.3073	1					820.62	813.57	1064.55	613.93
-.M*QNLGLQYPLFGPEIQCPHCR.Q	SLL1274	8.85708e-10	3	907.10297	1									27149.6	14163.2	19962.5	17338.4
-.M*QNQVLQAFFLGR.A	SLL1769	4.04588e-17	2	856.45685	11	63438.7	47158.5	50271.6	70333.9	56414.8	71410	69772.3	108100	157095	126066	274219	99601.4
-.M*QPTDPNKFTEK.A	SLR1641	8.77606e-14	3	628.66705	1					27947	38780.3	20987.8	51363.6
-.M*QPTDPTKFTEQAWDAIVK.S	slr0156	5.1922e-20	3	885.4646	5	35227.1	38342	22834.7	44321	20358.8	36889	23934.1	49362.6	29690.4	53347.9	29194.4	41509.8
-.M*QYFDFLPEITEK.S	slr6096	1.04848e-17	2	983.00104	2	23200.9	17558.6	15499.4	26908.7	40461.9	48848	43131.1	68201
-.M*RDAVTTLIK.N	slr1459	5.10832e-11	2	726.425	3					45668.1	106024	73916.4	101648	157298	499681	90470.5	239062
-.M*SIQEIFTK.A	SLR1970	3.33459e-12	2	700.8875	3					180419	292756	295201	307460	41303.5	59968.7	58022.4	50243.6
-.M*SPNPANPTDLER.V	slr1280	2.40917e-17	2	801.3881	7					58515.1	131928	79085.1	119560	110882	278255	112939	245100
-.M*TDTALLEK.I	SSL0385	5.91181e-12	2	663.3641	1					5266.2	10725.9	24119.5	11746.2
-.M*TEEQQGPNTTPNEETASK.T	SLR0476	2.03966e-18	2	1198.5613	25					376.77	268.55	3893.08	12976	0	2633.4	1976.38	2790.13
-.M*TPDQVIVALDVPDLPK.A	sll0838	1.02246e-19	2	1078.0997	4	17207.7	14827.6	17483.2	15119.4	50826.7	51271.9	64209.8	58521.8	18753.4	28183.1	28195.5	27896.5
-.M*TPERVPSVVFK.T	SLL1621	4.46021e-16	3	565.32275	16	549659	752426	800077	1.00065e+06	5.13278e+06	9.10586e+06	1.90935e+07	1.91089e+07	5.20258e+06	8.97046e+06	1.56487e+07	1.1327e+07
-.M*TPSDYQDQEVK.T	SLL0376	3.72181e-17	2	872.91785	13					10062	19401.3	26757.8	20192.4	38833.8	88344.9	71578.7	88077.4
-.M*TPSDYQDQEVKTPK.V	SLL0376	8.95198e-21	3	739.0465	1					1355.17	6591.85	9789.54	17504.3
-.M*TPSPVLNLLVSNDDGIFSQGVR.T	SLL1108	5.68966e-15	2	1310.1857	1					2844.74	5689.05	0	5248.46
-.M*TSAEALLEQIQNK.Q	SLR1907	1.42277e-17	2	940.5052	3	13456.9	18080.3	26316.6	17261	22876	53258.1	62132	55794.1	9204.17	13120.1	21387.4	10234.4
-.M*VISELLPNLDSGLTTLR.T	SLL0895	2.61796e-16	2	1066.5929	5	5146.69	3750.77	7093.63	4856.53	102429	46033.4	25891.4	48109.4	8342.83	16079.7	4331.09	8932.48
-.M*VSIRPDEISSIIR.Q	sll1326	1.29147e-14	3	592.66376	2	15103.1	178823	35016.8	131257					10865.6	131118	27701.1	59300.6
-.M*VTEQDREYMR.Q	SLL0051	1.45234e-14	3	539.9203	1									3659.23	7237.14	8215.2	8945.87
-.M*YIVQIASECAPVIK.A	sll1393	1.25509e-19	2	1013.5518	4					10808.6	21835.3	29288.2	25021.2	32373.1	37413.6	60673.4	35232
-.M*YNISFTPDRPLTYHLEDDQSLAR.L	SLR1438	6.80848e-10	4	761.37354	1									4737.57	10494.8	19521.6	8230.37
-.M*YSPGYVATSSR.Q	slr1643	5.71543e-17	2	739.8564	4					504361	2769.15	2836.86	1.15032e+06	245470	10704.9	9570.03	690710
-.MAEDTIFSK.I	SLR1234	4.84646e-13	2	665.3507	1					29491.1	47519.1	36195	46194.5
-.MAPQVDVLINK.Q	SLL1479	5.87501e-15	2	758.95233	3	22617	53168.5	31986.8	36765.7	24233.5	84504.4	42474.1	45051.5	31751.1	110517	37756.3	95014.1
-.MDAM*EFFR.N	slr2049	2.3808e-12	2	603.7742	2					415203	636418	879047	916025	274971	491310	453044	378794
-.MDAMEFFR.N	slr2049	7.81135e-13	2	595.7772	4	97213.1	84550	119970	109295	64050.5	115017	130445	112841	336866	551393	473517	394693
-.MDDLTIYTSPEEEELTAK.K	SLL0909	1.72228e-20	3	791.7256	2	4589.61	6925.52	25442.8	10236	27330.8	34952.7	38838.6	31209.5
-.MDDTNTTLLLK.R	SLR1600	7.64315e-15	2	776.9279	4					76373.5	120678	165233	115915	518964	1.02014e+06	1.15036e+06	948589
-.MDIASWNVNSVR.S	SLL1854	9.83638e-14	2	768.3922	2	36159.8	29732.5	47449.9	34237.2					62582.2	85249.2	181400	74040.3
-.MDIPNTTATIATIPQAPAGFR.S	SLR0321	3.54015e-18	2	1165.6182	3	0	5816.6	8818.22	0	0	2909.39	7255.98	3752.83	5175.41	6710.67	4922.89	4065.11
-.MDLLEYQAK.E	SLL1023	1.06639e-12	2	699.8805	4	28917.5	58628.4	39935.7	45669.8	316980	619264	1.3965e+06	594751	13011	19402.9	23514.5	16329.1
-.MDLSRIPAQPK.A	slr1622	6.27991e-15	3	515.29974	9	16500.9	356188	135687	366602	660764	3.70933e+06	4.80948e+06	8.50899e+06	905747	4.40984e+06	8.09259e+06	5.04192e+06
-.MDLTTQYLGLNLK.S	SLL0744	6.62707e-17	2	899.504	1									13308.4	27595.5	13479.1	18935.3
-.MDQSLTQDRPLAAVFR.R	sll1423	2.70605e-17	3	664.687	3	141379	242382	243105	217413					139990	315634	279527	213068
-.MDQSLTQDRPLAAVFRR.L	sll1423	4.63866e-14	4	537.79114	2					11828.3	74588.5	43339.7	131436	18064.5	79127.6	89444.3	44127.4
-.MDSTLGLEIIEVVEQAAIASAK.W	slr2094	3.61232e-23	2	1288.716	65	132301	9948.67	12925.6	31354.2	93870.4	36931.6	15650.1	43823.1	117813	40979.5	36189.3	28050
-.MDTFDAIYQR.R	SLR1719	2.00104e-14	2	702.3409	2	92933	109110	326594	222880	89469.1	140651	372402	180662
-.MDTFDAIYQRR.S	SLR1719	1.82068e-13	2	780.39087	2	11912.4	20661.1	27723.1	38990.4					21589.2	26911	50745.3	24801.8
-.MDWSAIAASLTTQGLEVIQDPQQR.K	SLR0806	6.89432e-19	3	934.8129	2	4891.86	0	0	0					4022.28	3209.21	9583.9	3294.77
-.MEAKLPQNEEQR.L	SLR1143	1.29626e-15	3	587.6443	2					34619.9	47480.9	80925.3	107418	56313.1	71093.1	134672	72265
-.MEELLELK.Q	sll1630	1.01717e-10	2	646.8719	3	230558	308171	711282	520025	98192.4	142637	387200	237789	70858.5	106182	259080	147569
-.MEFSQLVER.L	SLR0776	5.4044e-13	2	641.832	1	28699.2	70663.5	35762.2	50818.7
-.MEIFVYHTPELTPDQSLPDCAVVIDVLR.A	SLR1718	1.21463e-13	3	1134.5822	1					5402.41	0	0	0
-.MEIGVPK.E	SLL1682	2.13927e-10	2	531.3158	4					83849	191031	263859	190358	457452	896847	1.16813e+06	1.20741e+06
-.MEITFLGTSSGVPTR.N	slr0050	2.41538e-16	2	870.4609	1					4134.97	7378.11	7092.14	6520.71
-.MEITTEDYR.I	SLR1659	2.80353e-13	2	651.3109	1					94826	83468.2	379737	90004
-.MELEHPDDLYYLDSHEYVR.F	SLR0879	4.34728e-23	3	856.73267	6	206192	174938	116492	135383	23850.8	39520.5	18992.5	32922.2	75171.4	80920.8	55517	74553.4
-.MELYLIR.H	SLL0400	9.45707e-10	2	541.31274	4	389690	207623	203314	257687	562585	478836	317550	544842	273471	194037	278972	141324
-.MENNSLAPLR.V	SLR0355	1.50758e-13	2	644.8427	2					137766	194638	420199	273920	186877	297472	658749	415260
-.MENPVPITPSETIVDSCQR.L	SLL1584	6.87261e-13	2	1159.0674	3	0	13527.2	20879.2	29461.9	0	3069.86	2945.67	2117.04	3564.8	9789.85	14812.7	7606.56
-.MEQPMKPTVIITGASSGVGLYGAK.A	slr0506	1.06788e-17	3	956.5282	4					34468.5	52256.1	56484.4	48787.8	67203.1	150383	84624.9	51980.7
-.METEQLLWQYGQGTR.D	SLL1446	1.62617e-17	2	992.4897	2	10902	23671	17754.2	28937.6	16130.3	35250.6	25673.1	28048.9
-.METTNLPMEQIR.Q	SLL1504	1.16013e-13	2	803.9066	2	72647	100938	85620.1	104404					22981.7	32041.8	31718.2	37135.1
-.MEVFDPTPPPWVEDTVHAR.G	SSR1552	2.25146e-25	3	789.7229	8	120221	133871	226727	157309	16502.2	18414.6	46410.4	23912.8	13817.4	19883.4	20298	13891
-.MFDAATLAAITAEAR.Q	SLL1296	6.68717e-17	2	848.44684	6	26782.9	16693.1	22992.4	25573.8	14452.5	18369	21220.7	21991.3	10551.9	18677.7	21320.7	16586.7
-.MFDNLCK.F	SLL0800	1.20875e-11	2	608.30756	1					90134.5	227027	230779	300642
-.MFDVFTR.V	sll1577	2.78811e-11	2	530.2745	53	1.15559e+08	982347	24531.2	3.17554e+08	9.84791e+07	76946.3	84473.6	3.34097e+08	9.33401e+07	146722	26342.6	2.15491e+08
-.MFEDFEQDALFTPDQLLENR.G	SLR0650	4.84013e-20	2	1301.6183	7	17652.4	13642.5	18524.1	18062.9	10126	9557.5	9082.66	12307.5
-.MFIPLDFYR.I	SLL0169	1.48143e-12	2	673.3595	2	66684.9	45339.8	58895.3	64976.6	33174.7	48455.9	37966.2	44576.3
-.MFLEELKPVTR.E	SSL0294	5.28394e-15	2	825.978	11	499725	811602	900056	607586	222842	625365	737497	457342	89015.5	170328	215271	125489
-.MFNNILK.Q	sll0520	1.68583e-10	2	584.343	2	40576.4	80889.3	48783.1	60673.4	92450.3	130246	140386	113275
-.MGSALVIDDSSTER.S	sll0039	4.7172e-16	2	812.90125	3	22473	64593.2	32299.7	53417.9	21106.4	97273.1	34337.3	66314.4	14964.8	58467.7	28433.9	33377.8
-.MHISELTHPNELK.G	SLL1945	4.00563e-18	4	460.00223	2	109085	126571	90156.6	104279					86051	90763.4	79785.5	74002.1
-.MIAPDSSPHPLEIAPVLQQK.L	SLL1054	6.91495e-18	3	820.4564	5					123440	173397	301442	168760	43125.8	56602.1	118585	83248.8
-.MIDQETDGIEK.L	slr1942	5.36879e-15	2	783.9009	1									93815	106861	113414	110610
-.MIDQETDGIEKLETGIPGFDFLSDGGLPLGR.A	slr1942	1.16756e-17	3	1203.6222	4	7308.11	0	0	4093.49	0	6193.74	0	6721.83	7342.66	5748.99	3544.48	1780.37
-.MIEVEHLSK.V	SLL0489	6.91146e-13	2	687.387	3					67463.6	128121	123103	83938.2	36885.3	63205.9	39080.6	40669.6
-.MIFEQGIEIK.A	SLL0436	2.76202e-13	2	748.42334	1					47429.6	94873.7	135882	68951.4
-.MIFPGATVR.V	SSL0352	3.59531e-11	2	568.32367	3					771894	3.13233e+06	3130234	2.17404e+06	4.47596e+06	1.15824e+07	1.01277e+07	9.59447e+06
-.MIHHPPAGAR.D	slr1560	5.34756e-13	3	410.89352	3	1032.36	1636.62	632.85	1437.64	2852.36	4769.4	2591.8	4574.11	229.38	312.04	139.62	310.05
-.MIKNDIWIR.A	SLL1258	7.39463e-13	3	492.95743	1									19341.6	49374.1	104579	76157.9
-.MILELIER.L	ssl0546	3.45963e-10	2	580.8455	4	359072	93749.4	204540	253691	95851.2	49308.3	61672.4	79445.4	85571.9	25119.5	92394.2	32519.7
-.MIPSDLFLR.D	SLL1647	3.16714e-12	2	618.3507	3	46334.5	71850	122855	70190.8	58525.1	167553	283406	134763	59944.7	171139	292364	144049
-.MIQQQTYLNVADNSGAR.K	sll1806	4.68747e-21	2	1027.0151	15	156598	340967	228253	303352	124151	429477	456728	377588	53107.4	201684	201246	137057
-.MISIDLTLK.Y	SSL1972	1.35816e-11	2	661.40466	1	139042	68007.5	106926	93978.9
-.MISLDQVK.Q	SSR3122	2.746e-11	2	611.3579	2					549959	1.20487e+06	2.31066e+06	880286	517302	1.06675e+06	2.2931e+06	1.14685e+06
-.MISTTSLFAPVDQDLR.L	slr0611	6.70224e-18	2	969.51086	1									6618.96	11783	8981.25	6275.82
-.MIVIYHNPDCGTSR.N	slr6037	7.55523e-13	3	602.963	1									59636.3	96663.7	154666	74390.7
-.MIYDIFM*PALSSTM*TEGK.I	SLL1841	9.35269e-18	3	785.7223	11	32398.8	33107.5	45275.7	40459	31208.9	40013.2	50394.8	43609.2	56670.6	61444.9	36008.9	42020.7
-.MIYDIFM*PALSSTMTEGK.I	SLL1841	3.11842e-23	2	1170.0813	13	47430.3	53132.4	49369.1	49525.5	20912.9	29547.5	32035.3	33421.6	27081	39504.9	27007.4	27808.9
-.MIYDIFMPALSSTM*TEGK.I	SLL1841	6.1712e-24	3	780.39136	8	17543	13487.7	11885.6	15158.9	45594.2	44088.9	26316.7	35979.1	10978.7	6238.63	11258.5	4663.95
-.MIYDIFMPALSSTMTEGK.I	SLL1841	7.38317e-24	2	1162.0853	12	67638.8	95065.3	63124.9	51672.7	13644.4	32427.7	11570.3	17961.9	25208.8	38889.7	33078.2	23569.5
-.MKTPLTEAVSTADSQGR.F	sll1578	1.04625e-18	2	1040.5508	74	1.87422e+07	434152	314283	6.59638e+07	1.42335e+07	429981	646430	5.28384e+07	412242	533322	515368	847160
-.MKVTQEKLPDSQVGLEIEIPATASK.K	SLL0533	9.4919e-11	3	1096.9556	1	4554.22	9735.08	2530.34	5854.66
-.MLALIDTVK.S	SLR0651	7.09608e-12	2	646.39777	3	82297.5	79796.3	174281	141288	40769	72089.3	121230	97951.1	54892.1	95489.9	192780	95517.3
-.MLDEQAKK.T	SLR0001	8.63727e-11	3	465.60568	1	1694.24	3789.63	4361.28	2821.09
-.MLDIQAIADHAHQGAAALGIK.Q	SLL0887	6.57245e-18	4	608.8388	1	24509.3	24768.6	18692.6	29412.6
-.MLDKSFWQGK.S	slr0984	6.25354e-15	3	557.9794	1									21239	80234.8	114524	78554.3
-.MLDKTTLQER.I	SSL3382	3.94065e-12	3	508.28763	2									40378.8	120619	392941	102734
-.MLDLSGK.H	SLR1051	5.49447e-10	2	526.30585	3					1.14353e+06	3.1581e+06	6.42082e+06	2.2636e+06	81321.9	143693	249171	132002
-.MLELHQFELSQYSEK.V	SLL1545	2.41357e-20	2	1085.5566	10	212155	225742	411837	218675	45015.1	104591	58489.8	53883	19066.8	102105	68197.9	21027.2
-.MLEQDVVIVGGGLAGCR.A	SLR1233	8.16963e-17	2	959.504	9	63025.2	38162.3	75821.5	83613.1	25811.1	35362.4	23980.9	27808.4	47636.2	79267.7	70005.9	43033.1
-.MLGNFQHSQLR.I	SLR0740	7.97947e-14	3	492.26202	1									116234	149948	127428	82690.9
-.MLGQSSLVGYSNTQAANR.V	ssl3093	2.16647e-21	2	1021.01685	21	86320.9	57174.7	46785.3	1.22473e+06	40300.9	15353.1	6424.74	670481	33768.6	9780.94	48835.6	1.08229e+06
-.MLICLQCSAENPNR.N	SLL1033	2.73235e-16	2	925.44495	4	95016.7	137366	162001	163351	42975.1	81453.2	114318	88763.2	12371.3	35161.2	41318.4	25569.2
-.MLNIENK.V	SLR0315	2.56989e-10	2	575.3308	1									31055.3	60684.7	57554.9	54024.4
-.MLNPNLAEIELSQDDYQR.Y	sll1536	1.06438e-22	2	1147.0669	16	530260	1.52632e+06	1.17287e+06	1.59532e+06	48492.3	115873	96342.3	151710	58211	141773	130241	118982
-.MLPEVEQR.L	SLL1959	1.41969e-11	2	573.30853	1									167946	444559	496917	372257
-.MLQFQIQNDSEIPASK.Q	SLL1961	4.93404e-20	2	1069.0632	4	52809.1	78449.1	72811.3	69065.1	17390.5	30696.1	41314.6	36008.8	12113.7	25485.3	21384.7	17139.4
-.MLQLTPSAAQEIK.R	SLR1565	1.13471e-14	2	859.4912	2					22201.9	26734.7	14677	23601.2	65290.7	96268	57082.6	105855
-.MLQLTPSAAQEIKR.L	SLR1565	7.25745e-10	3	625.36084	1									21602.1	29360.3	15887.6	22828
-.MLSKVPATIEEIAAR.E	SLR0752	5.55539e-19	2	959.0568	21	373720	1.37813e+06	762019	1.71886e+06	227253	654431	534497	1.02368e+06	486920	1.65846e+06	1.55057e+06	1.45262e+06
-.MLSTEM*PLPTTGSTLLK.T	sll0504	1.12043e-21	2	1062.5789	2	10995.7	18061.2	15975.3	13351.5	5203.76	11034.8	12843.7	9786.12
-.MLSTEMPLPTTGSTLLK.T	sll0504	4.337e-19	2	1054.582	4	31692.3	44350.6	53138.8	65199.7					37051.6	64430.6	58265.1	67011.2
-.MLTIALPK.G	sll0900	1.03746e-10	2	587.8772	2	118946	225109	219903	269207					17168.7	88688.3	22162.8	41329.1
-.MLTSTTDIVQGR.T	SLL1118	3.88506e-16	2	733.39325	5	899334	1.32559e+06	1.89124e+06	1.88153e+06	220913	488430	835118	639011	140818	356437	416536	414496
-.MLTTDAVLTVLRPVQDPELQK.S	SLR0067	6.06898e-19	3	885.83875	8	118165	70775.8	131995	120813	68013.2	113559	63392.2	83747.1	22269.9	28566.2	20470.5	13976.9
-.MLYLAEIK.K	SLR1301	6.73204e-11	2	634.8794	5	139361	105929	126977	158604	84895.9	135364	113885	138486	549346	671496	913553	553583
-.MLYLAEIKK.Q	SLR1301	3.17657e-12	3	514.32043	1									113469	173206	205350	92203.6
-.MM*TDNEVFK.E	SLL0401	2.43635e-13	2	709.8477	1					29723.6	85076.1	135432	58065.3
-.MM*TDNEVFKEGLAGVPAAK.S	SLL0401	3.01249e-18	3	819.4336	6	35323.2	204157	148756	143027	39257.3	135177	173186	174407	84853.7	288464	432635	307613
-.MM*TLEPNQEQLK.K	slr0943	2.80895e-16	2	883.4558	2					23499.2	39600.5	125797	52441.9	36567.1	84867.4	116413	66261.2
-.MM*TLEPNQEQLKK.M	slr0943	1.41161e-16	3	680.0375	1									87386.7	156983	488178	256386
-.MMTDNEVFK.E	SLL0401	3.40724e-14	2	701.8499	1					129207	469420	521319	232833
-.MMTDNEVFKEGLAGVPAAK.S	SLL0401	2.46367e-22	3	814.10205	7	91116.6	441538	313794	400516	22494.8	129267	195478	163006	5623.85	29191.5	33940	20547
-.MMTLEPNQEQLK.K	slr0943	7.51906e-17	2	875.45917	3	48962.2	96009.8	160338	90279.9	14596.7	16989.9	38800.1	18182.7	32119.9	63407.3	170036	56669.2
-.MMTLEPNQEQLKK.M	slr0943	2.81889e-18	2	1011.5567	4					131249	208413	618789	315674	35515.1	97139.8	158661	73684.2
-.MNAVAACFNALR.Q	slr0966	1.66785e-14	2	741.37616	1					52537.3	119416	96671.4	121500
-.MNAVLLVEDSSSQR.E	SLR1042	3.27231e-15	2	846.9373	2					93948.2	182491	123161	111465
-.MNDLILAVR.Q	SLL1927	1.52654e-10	2	594.8472	1	73380.1	45343.8	91052.1	55928.7
-.MNIPILDLKPQYQR.I	SLR1666	5.52009e-15	3	673.05396	3	86820.1	90674.3	77478.6	126553	53017.5	76479.1	44607.6	79048.6	231763	325093	220780	299790
-.MNIQEIQTIANQLTLTLDSPQSVK.L	SLL0911	1.55652e-15	3	991.8784	1	3539.82	0	3005.95	2306.31
-.MNITIGR.G	SLR1722	4.8601e-10	2	474.77448	3					99904.9	200768	263965	180788	1.92379e+06	3.60811e+06	4.7316e+06	3.45675e+06
-.MNITSPLSAPSHQYPDALGR.F	slr0543	3.2447e-24	3	767.05975	7	19682.6	19035.6	25639.3	19662.5	174471	472689	390279	396446	383717	814813	519772	612200
-.MNKGELVHAVTDK.A	SLL1712	2.18334e-15	2	937.528	28	923030	1.00084e+06	447523	553042	2.78639e+06	6.866e+06	2.62655e+06	4.24251e+06	406604	737960	264604	463637
-.MNLATIK.V	SLR0863	4.72556e-10	2	539.82874	1									72580.6	177536	63907.1	133337
-.MNLSELSPK.D	sll1813	1.10446e-12	2	653.868	10	603328	1.50521e+06	1.5829e+06	1.10077e+06	434324	982497	1.73407e+06	795608	314613	560054	869006	683793
-.MNLSELSPKDGAK.K	sll1813	3.50814e-14	3	608.0081	3					60525	94124.2	245794	228903	49592.7	110670	471304	209024
-.MNNYTKDDDGRLNNFAVEPK.I	SSL1498	2.2043e-13	4	694.34906	1									50255.7	112434	165024	66270.8
-.MNPLDSFK.S	SLR1619	3.52075e-12	2	620.3355	6	1.72605e+06	2.52429e+06	2.63999e+06	2.46619e+06	152290	337500	501835	383596	1.72539e+06	3.48979e+06	3.4059e+06	4.33146e+06
-.MNPLDSFKSQVEANVTGLGADKDIQALSR.I	SLR1619	1.13327e-14	4	884.97314	2					5400.63	7157.97	5906.19	28907.8	0	6664.34	15540	7807.18
-.MNPSINSVDIESATAFIR.H	SLR1983	6.02748e-19	2	1055.0437	3	21560.5	26191.3	23555.3	34702.2	16364.2	32103.9	8059.92	31033.3	18078.6	36951.9	6149.12	25770.4
-.MNQEIFEK.V	ssl2084	4.83215e-12	1	1326.6946	5					709113	1.64188e+06	1.47571e+06	879018	266781	485629	492616	491364
-.MNQEIFEKVK.K	ssl2084	1.79076e-14	3	566.6582	2					35473.8	156323	235537	316423	21197.8	63801.7	145558	58455.7
-.MNQTNLDFLATSDPALAAIIDR.E	sll1931	1.88738e-21	2	1267.6599	7	33065.7	16053.3	25755.7	16088.6	16098.7	18989.8	12407.5	12169.3	22995.3	18651	15884.6	12118.4
-.MNQTNLDFLATSDPALAAIIDRELQR.Q	sll1931	2.62649e-14	3	1020.8695	2	46624.6	10531.6	11470.4	15537.1
-.MNTIYEQFDVVIVPVPFTDR.Q	SLL1130	9.59347e-18	2	1264.1594	1									2344.83	0	0	0
-.MNTLGSGLK.I	slr1511	3.66372e-12	2	604.8476	1					84280.9	172158	184502	172531
-.MNTQFFEEYQTQLLDWQK.K	SSL2501	5.49894e-16	3	879.77014	1	7068.61	2727.51	3899.55	4532.03
-.MNVIPTTIADVLILEPK.V	slr1933	9.28181e-16	2	1078.1362	8	13193.8	6705.15	8290.38	12640.7	28218.6	30632.9	18516.8	38005.5	31070.1	20664.3	30654.8	32975.4
-.MPGDYYQTLGVTR.D	sll0897	4.92832e-10	2	823.411	1					69668.4	209509	165590	175809
-.MQANDSSNKVVYWGTGR.R	sll1822	3.5345e-17	3	734.3707	6	32566.3	54497.5	35919.4	61729.5	106736	176702	269562	364385	182811	251383	364496	355890
-.MQATLHQLK.V	sll1594	7.45921e-13	3	453.2664	3					32110.5	117133	84357.1	122763	120227	317449	205156	342628
-.MQDAITAVINSADVQGK.Y	slr1986	4.8674e-22	2	1025.0475	153	1.14161e+07	3.40093e+07	389909	1.74163e+07	3.03826e+06	1.059e+07	203105	5.72792e+06	5.26769e+06	2.06425e+07	398439	1.1226e+07
-.MQDAITAVINSADVQGKYLDGAAM*DKLK.S	slr1986	1.04016e-14	4	890.48016	5	6676.97	12835.4	6724.83	21877.2	25825.1	45364.6	9209.74	102741	4286.69	32876.1	1006.59	14051.7
-.MQDAITAVINSADVQGKYLDGAAMDKLK.S	slr1986	2.26028e-16	4	886.2293	4	19255.4	86709.2	8356.2	42213.9	18181.8	54278.5	15104	68806.2	18688.2	74293.7	21931.1	23682.5
-.MQEELSVLLK.A	SLR0374	3.58408e-13	2	739.4313	6	128864	120356	158155	96604.5	98744.4	162604	123974	89356.6
-.MQEFDKSISFDGR.D	SLL1043	2.91565e-18	2	924.46356	7	31826.4	122052	110377	192687	63921.8	132131	457885	552229	89717	574941	2.67078e+06	715913
-.MQEFDKSISFDGRDIR.L	SLL1043	7.69445e-13	3	744.7146	1					18005.9	33887	100899	94875.1
-.MQNQVLQAFFLGR.A	SLL1769	1.44153e-12	2	848.95435	3					15176	17777.4	9757.26	18775.4	197405	149541	294802	93874.7
-.MQPTDPNKFTEK.A	SLR1641	1.64944e-16	3	623.3356	2					656379	1.33411e+06	418014	1.08829e+06	310043	594939	174898	552567
-.MQPTDPTKFTEQAWDAIVK.S	slr0156	5.32054e-19	3	880.13574	5	109253	207319	77549.1	231220	35635.3	72329.2	20726.1	91514.6	36724.4	54311.6	24730	57833.1
-.MQQAAIPANEQQR.L	SLR1142	5.10842e-15	2	814.9179	2					2837.57	6378.88	7689.37	6327.91	4364.48	11361	15902.1	11211.4
-.MQWQESLPWTPEAR.Q	SSR3304	2.05559e-18	2	951.9681	2					7773.97	21095.2	21944.2	18018.8	5816.91	25998.3	21864	26536.4
-.MQYFDFLPEITEK.S	slr6096	3.80753e-18	2	974.4991	1	34463.3	40865.7	34814.5	74498.3
-.MRDAVTTLIK.N	slr1459	2.19692e-11	2	718.42926	9	206488	990373	0	645425	283656	823285	93528.3	759562	1.03699e+06	4.40917e+06	56246	1.86597e+06
-.MSDLIVIGYDDEYKAEEVR.L	SLL1106	1.47679e-18	3	845.0967	1									43730.2	43859.3	34643.8	17416.5
-.MSHSYHCR.I	SLR0519	1.58205e-11	3	407.85043	1					0	218.54	78.21	0
-.MSIQEIFTK.A	SLR1970	1.10385e-12	2	692.89044	1					591155	1.04353e+06	918367	1090326
-.MSPNPANPTDLER.V	slr1280	2.38676e-16	2	793.39014	8	33092.4	69720.6	25192.2	50662.9	179233	551116	190820	384343	107345	226330	80901	154920
-.MTDLTLAALK.T	SLR0185	4.92955e-13	2	682.9054	1					97449.7	122808	126942	87183.1
-.MTDTALLEK.I	SSL0385	1.95699e-12	2	655.3647	1					12137.8	27232.7	34060.9	25422.6
-.MTEEQQGPNTTPNEETASK.T	SLR0476	5.80103e-21	3	794.04443	20	184.4	1248.54	116.81	124.06	1648.83	3140.22	5051.35	4340.31	4782.19	15504.2	13276.4	9744.66
-.MTEEQQGPNTTPNEETASKTTAANR.S	SLR0476	8.36509e-11	3	998.8135	1									0	1773.99	305.21	614.17
-.MTIEIGQK.V	SSR2998	3.42915e-11	2	604.3505	1					366056	596380	511406	678760
-.MTNLPEFR.H	SLR1103	3.12266e-10	2	576.30255	2					92763.4	281963	179382	237937	122115	266920	102845	214781
-.MTPDQVIVALDVPDLPK.A	sll0838	6.09196e-21	2	1070.1038	11	194101	160864	152199	212501	33371.4	63754.9	44900.8	73505.8	51296.2	50211.2	34555.4	43998.6
-.MTPERVPSVVFK.T	SLL1621	2.43379e-17	3	559.99115	15	338597	574722	470100	645525	8.27861e+06	1.32806e+07	2.25184e+07	2.45008e+07	1.72294e+07	3.22842e+07	4.59325e+07	4.00734e+07
-.MTPSDYQDQEVK.T	SLL0376	1.44056e-17	2	864.92004	2					53261.6	138624	171017	110483
-.MTSAEALLEQIQNK.Q	SLR1907	5.40062e-13	3	622.00745	2	11614.6	18159.6	16896.1	15870.8					116628	162176	152296	126078
-.MTSDDAAAGLVR.V	sll0461	5.58179e-16	2	675.84283	2					80980.3	177163	201567	148583	290634	701466	520514	615659
-.MTSTTPEIEALAADIGEQIAIDVAK.W	SLR0729	4.63157e-17	3	959.18134	1	5193.9	1418.48	1460.29	2047.96
-.MVECLVQAPLKVQR.S	sll1639	6.65772e-18	3	653.709	2									50345.4	86205.5	116254	79426.8
-.MVISELLPNLDSGLTTLR.T	SLL0895	9.90856e-15	3	706.06616	4	9624.06	7132.93	8266.42	12133.1	19839.7	24725.8	15579.9	21190	6075.61	11527.4	3046.98	5800.44
-.MVSIRPDEISSIIR.Q	sll1326	7.08556e-15	3	587.3328	10	42257.4	209775	60741.9	135815	49149.8	245125	61256	157226	58599.9	165171	86543.1	74966.5
-.MVTEQDREYM*R.Q	SLL0051	8.24034e-12	3	539.9214	1					8177.06	17450.8	16323.2	17823.6
-.MVTEQDREYMR.Q	SLL0051	1.06921e-16	2	801.3788	3					118284	244798	302015	290534
-.MYIVQIASECAPVIK.A	sll1393	4.15474e-20	2	1005.55536	7	62401.2	40872.4	107551	91527.1	50585.1	50290.4	50618.2	57110	28316.4	10951.5	37937.5	8441.19
-.MYNISFTPDRPLTYHLEDDQSLAR.L	SLR1438	6.83148e-23	4	757.3758	2					23241.9	67821.6	57736.7	42992.9	23383.8	42783.9	30783.7	24424.1
-.MYSPGYVATSSR.Q	slr1643	9.86574e-11	2	732.3626	1									31601.1	20420.6	24854.9	52889
-.NAVLLVEDSSSQR.E	SLR1042	1.77253e-16	2	781.4185	2					89390.4	168098	290812	198773	123973	239223	351072	237396
-.NIPILDLKPQYQR.I	SLR1666	1.71567e-15	3	629.37537	9	174600	143345	177499	245564	353403	371492	373888	542689	307687	313397	389140	434564
-.NITSPLSAPSHQYPDALGR.F	slr0543	2.7163e-22	3	723.3784	3					52294.5	95687.5	151450	106532	64089.4	103883	152143	115589
-.NKGELVHAVTDK.A	SLL1712	2.04171e-12	3	581.67804	1					46597.2	38890.8	40324.8	31504.6
-.NKTVLPTIDNLDHK.W	sll1821	3.17647e-16	4	510.8002	1									45554.5	103815	122750	82893.1
-.NLPIVNER.N	slr0758	5.10002e-11	2	549.8226	2					1.01586e+06	2.227e+06	5.81251e+06	2.93046e+06
-.NQTNLDFLATSDPALAAIIDR.E	sll1931	1.09949e-15	2	1202.1364	3	19921.1	10225.9	21813.6	13201.6
-.PELPEVETVCR.G	slr1689	1.21334e-15	2	736.8785	3	142665	565896	193326	331922	55124.2	215673	112490	128124	50942.3	186442	75083.5	129847
-.PEVTKPAHQTGDFLVDYEEK.V	SLL0783	6.53755e-16	3	912.47986	3	56979.4	78967.4	205766	65778.8	8435.14	24697.7	52384.6	23531.1
-.PIGVPSVPFR.L	slr0165	1.61097e-10	2	606.86554	1	122214	58487.7	101296	54812.3
-.PIGVPSVPFRLPGSQYER.W	slr0165	1.06511e-15	3	715.0654	5	236194	200561	250260	193477	333395	585860	492305	320575	330432	438304	240688	224398
-.PLPTSLTTLDGTPLAPEVIADK.V	slr1992	7.6288e-22	2	1269.2219	9	153812	10090.1	89344.2	15664.9	10862.1	10459.1	14796	3929.67	150559	4349.07	29096.1	4331.84
-.PLPTSLTTLDGTPLAPEVIADKVVLFVNVASK.C	slr1992	5.6244e-32	3	1246.7317	11	21250.8	907.42	0	4252.33	5282.6	3481.99	2702.23	3972.22	6879.48	1496.28	2101.16	528.77
-.PLSSQPAILIIGGAEDKVHGR.E	SLR2001	1.83063e-15	4	612.3569	1									14354.9	16656.4	5151.12	8653.21
-.PLVSQSDLVSAAIAHR.V	SLL1866	1.14141e-17	3	603.3432	4	33964.4	43791.7	55330.6	40527.5	11556	10614	16324.6	13735.6	68103.1	100831	133924	125929
-.PMEAGQQFLTPAESHAVDGALLSQSEK.F	SSR2781	1.74898e-14	3	1043.8636	1					4781.36	4888.22	5525.13	5119.92
-.PNASTALTGK.A	SLL0359	1.34968e-13	2	624.36285	3	5353.92	12825.8	10590.4	13772.4	97218.9	160709	224898	242772
-.PNELSNLPPVLGSEETIAPR.R	SLL1350	7.33953e-16	2	1139.1141	2	5100.35	12395.9	11559.1	9752.1	0	12236.4	11585.1	13240.5
-.PNIVEIAVSDER.F	SLL1735	1.25278e-15	2	743.4056	6	544749	225513	440301	396180	5.13899e+06	6.45843e+06	3.54604e+06	4.32713e+06	1.11233e+06	1.48206e+06	667259	911228
-.PNLEPAVVVPTSEAIAVDLTKLEEK.L	SLR0293	8.1843e-24	3	1032.2595	8	183858	73111.8	170819	372422	10104.9	5477.64	13220.2	14098.6	8505.62	19474.9	34152.2	24870.9
-.PNPKPLPPQSELDNIR.R	SLR1919	6.17411e-17	3	701.7319	1	25055.8	17455.9	21034.8	30958.2
-.PNPSFLPPETDHQR.L	SLL0625	7.84382e-18	3	593.6356	9					254077	385690	428263	266814	287651	467992	501559	422579
-.PPQFPLATVGALVTAPDGR.V	SLL1537	1.70105e-17	2	1026.0737	5	55097.1	22392.9	40378.3	38789.3	45538.1	49853.6	52649	44862	47857.6	50247.6	60256.2	70749
-.PPTFVLASASPAR.K	SLL0905	2.94148e-13	2	729.4153	1									123775	190366	256415	187954
-.PPTLLLSQDLPSLNYTTPGDRLDGR.W	slr1322	9.06008e-13	3	961.8502	2	100052	105979	85404	90614.9
-.PQACVIGLGR.S	sll2010	4.29142e-10	2	607.8428	1					41613.8	74785.4	77096.9	86041.5
-.PQTQPGIEDFLLR.Q	SLL0507	2.02508e-15	2	829.4568	3	46836.7	60336.9	55548.8	70845.8	16666.2	24496.8	30495	27619	34706.4	90448	105951	51776.5
-.PSADTLSQFEVFDYDLPEDVCQQLLACK.E	SLL0320	3.5468e-10	4	894.93463	1	8496.51	0	0	0
-.PSSSNSAAFSLDEFAK.A	slr1984	3.04739e-21	2	973.49207	10	113290	199144	208109	219616	71612	189692	183710	214520	101797	225079	211167	220727
-.PTIQQLIR.S	sll1096	2.25771e-10	2	556.84906	4					616914	1.21342e+06	1.75567e+06	1.12194e+06	170820	427923	413061	379913
-.PTLIVATGNPGK.L	SLR0402	2.4496e-15	2	728.44116	2					23589.8	51992.4	61796.3	57093.1	44470.8	108678	147735	73962.9
-.PTVETDLAQILER.I	slr5051	4.71993e-16	2	814.95306	8	246066	205438	533998	298889	430913	809241	2.44052e+06	801644	702313	1.56915e+06	2.97733e+06	1.00562e+06
-.PTVHCSNCDCQAPNDLGDR.L	SLL0602	8.7193e-20	3	787.33594	8					2329.47	4294.97	5295.58	4262.61	9063.99	19329.9	10611.3	6647.6
-.PVVSLADLLESGVHFGHQTR.R	sll1260	4.43559e-18	4	577.3154	5	65777	19040.4	18226.4	37645.8	8796.62	8554.52	3488.47	8006.41	4925.46	3177.04	3508.28	2131.02
-.PYAIDFGTTNTVIAR.W	SLR0086	1.52986e-12	2	892.47943	1					15569.6	35357.8	23042.1	34533
-.QDAITAVINSADVQGK.Y	slr1986	2.59778e-18	2	959.0224	2	116113	313080	249360	162806
-.SAATDQILEQLK.S	sll1746	5.92911e-15	2	802.9575	33	2.34958e+07	3.26562e+07	3.99775e+07	3.64805e+07	1.20836e+07	1.71899e+07	3.1004e+07	1.81067e+07	2.11043e+07	3.79589e+07	6.76209e+07	4.46983e+07
-.SAEAVIENR.D	SLR0645	1.03202e-11	2	566.8068	2	16277.9	26201.5	39453.2	24617.4					16378.6	26009.9	55692.4	29217.7
-.SAEFFDCLQHK.C	SLR1437	5.09637e-15	3	557.2805	2									257152	1.06628e+06	562846	345833
-.SANLAQLHQALENR.T	slr2032	2.28842e-16	2	854.9639	13	540932	791191	281760	733573	2.14985e+06	3.20499e+06	1.20035e+06	2.79492e+06	719494	1.30783e+06	667717	754685
-.SAQSAVGSIETIGFPGILAAADAMVK.A	slr1839	6.27648e-13	3	931.5132	1									2615.74	1405.59	0	1203.52
-.SATPQVSDASFK.E	slr0623	1.19533e-16	2	763.40717	10					449550	1.16249e+06	896092	426225	412006	906708	637684	621305
-.SATPQVSDASFKEDVLDSELPVLVDFWAPWCGPCR.M	slr0623	5.64475e-15	3	1423.0366	14	16964	0	0	0	9216.62	0	0	0	7973.28	0	0	0
-.SDATPFRPPSEAEEALIK.E	sll1077	8.43886e-17	3	749.40125	1									15191.2	28302.4	25569.5	24042.9
-.SDDCQALLSATR.L	sll7028	7.76293e-15	2	740.86115	2					67894.8	152885	142628	133191	28195	62750.6	28919	55456.8
-.SDDTPHPEWQLVPQGNFVR.L	sll0288	3.91947e-18	2	1183.5848	4	46844	80107.1	69256.8	53816.7	0	11573.5	8092.52	13267.3
-.SDHALGSVTQGSLSK.G	SLL0284	1.30789e-19	2	887.9799	1									21215.1	32256.3	23192.7	27366.4
-.SDHTAQINDLCQALETLDQAETLQGAEYR.E	SSL1533	7.08562e-26	3	1145.5505	7	0	0	0	0	0	0	0	0	5598.87	3043.94	0	0
-.SDIPFTLDQLR.I	sll0998	1.12044e-13	2	724.89703	7	96502.1	152541	175789	173551	23914	36602.7	50730.1	39292.4	187999	471831	516825	511296
-.SDLIVIGYDDEYK.A	SLL1106	1.48991e-15	2	909.4747	2	199082	61722.4	91684.5	83387.8
-.SDLIVIGYDDEYKAEEVR.L	SLL1106	6.51541e-20	2	1201.6212	82	1.91492e+06	598449	561906	1.1952e+06	1.36215e+06	1.82532e+06	428760	1.42601e+06	2.32622e+06	2.44819e+06	1.4221e+06	1.0243e+06
-.SDLPTPEAPEM*TNPAPAEPPPTYVK.L	SSR0109	2.44235e-17	3	985.16345	8	26036.9	30612.5	55589.3	14529.2	0	22661.6	43181.3	7413.12	8982.47	30690.7	35189.4	31265
-.SDLPTPEAPEMTNPAPAEPPPTYVK.L	SSR0109	2.67502e-25	3	979.83057	11	0	13726.8	26896.2	12864.5	0	7175.27	37978.1	0	4657.8	25438.6	80382.4	7424.5
-.SDNLTELSQQLHDASEK.K	sll0558	4.73361e-22	2	1102.056	7	165038	408755	227724	226210	78771	256545	151663	179867	154326	339678	265394	352891
-.SDNLTELSQQLHDASEKK.Q	sll0558	3.1905e-19	3	825.7714	5	106867	247113	122176	189004					80977.6	163472	77388.6	103111
-.SDPSAKPLQEHILIILDDAGRR.E	SLR1951	2.17076e-12	5	547.3141	2	101192	0	0	0					29380.1	546.91	0	0
-.SDRITPAENLGSPESSLLLAQGLSK.S	slr0467	3.67368e-17	3	957.859	4	15484.8	26684.6	25904.1	27358.5	11397.4	17689.5	20928.9	24530.1	17110.9	18116.6	32612.3	22150.5
-.SDTIESILQEER.L	SLL0542	2.12827e-14	2	782.40314	6	47532.3	103909	34563.6	73153.7	8258.05	9778.89	5068	4817.59	423370	1.29613e+06	387495	835761
-.SEELQPNQTPVQEDPK.F	ssr1789	1.71417e-16	2	1064.0449	7	14641.8	8711.46	20282.7	9203.46	0	0	8562.14	0	9286.55	6630.59	17505.5	7995.64
-.SEFM*SNSIPLVGLK.A	SLL1280	2.2799e-17	2	913.50244	2	28401.7	36853.3	51083.5	34549.7	7163.06	16788	17218.7	10845.5
-.SEFMSNSIPLVGLK.A	SLL1280	2.96827e-12	2	905.9975	1	7506.86	15421.5	12835	11944.7
-.SENFAVATPVR.V	slr1784	2.38761e-15	2	667.86224	2					152026	289641	548390	275481	20682.9	26876.3	34712.8	23126.5
-.SEPKPSQPNFSHLEEADYTGR.M	SLR0616	6.04874e-20	4	670.08405	2	98221.5	92955.7	48215.5	130391
-.SEPNLNPAYTLDQAIANLQQTEDASAR.Y	slr1878	3.32268e-16	4	769.3853	6	0	0	0	0	2645.56	4799.01	2406.11	4265.18	0	0	3404.17	0
-.SEVYWQAK.I	sll7090	2.19475e-12	2	649.85114	2									103804	210600	146158	291049
-.SFDTPLKPYLAIPIQDCGEPLAPINLEGVK.S	SLR1679	2.51539e-16	3	1243.3505	10	8059.54	1844.4	6036.97	18701.7	5445.12	6864.64	5003.21	7924.54	4686.69	4832.62	5368.53	4222.31
-.SFFDSDIIQQEAK.Q	SLR1915	2.83421e-17	2	908.47186	8	167131	315162	547838	310958	89043.9	189188	493256	136856	88840.7	125417	346758	175214
-.SFTDDQSPVAEQNK.K	sll1742	2.25507e-19	2	927.46	4					21996.8	39805.9	91209.7	69710.6	41723.3	81204	114952	120788
-.SFTDDQSPVAEQNKK.T	sll1742	7.41437e-21	2	1063.0541	15					1.22575e+06	1.84093e+06	1.79575e+06	2.78382e+06	904177	1.73936e+06	2.24353e+06	2.51493e+06
-.SHSDLPLANAVPLDKIR.Y	slr0608	3.04577e-12	4	534.5612	1									12115.3	42362.3	21264.6	13833.9
-.SHSTDLSALAR.W	SLR1649	2.23037e-14	3	434.56845	1	15341.2	27706	15708.2	21151.3
-.SIAVGM*IETLGFPAVVEAADSM*VK.A	sll1029	2.34598e-25	3	919.15717	68	405045	52026.5	257526	223689	194273	124888	170541	113753	302650	149156	292697	139320
-.SIAVGM*IETLGFPAVVEAADSMVK.A	sll1029	4.6528e-25	2	1370.2341	36	137106	2107.12	57490	38695	434759	125825	706389	170190	73617.6	36135.2	55804.1	36420.1
-.SIAVGM*IETR.G	sll1028	2.36337e-13	2	618.83997	21	1.83194e+06	2.09152e+06	3.92723e+06	3.33895e+06	6.47074e+06	1.25465e+07	2.66252e+07	1.42745e+07	1.81005e+07	3.51417e+07	4.04214e+07	2.48526e+07
-.SIAVGMIETLGFPAVVEAADSM*VK.A	sll1029	1.20653e-25	3	913.82587	57	388745	17884.9	55447	9010.81	70746.1	52451.3	43020.3	44421.7	296201	194127	197406	133678
-.SIAVGMIETLGFPAVVEAADSMVK.A	sll1029	1.67193e-28	3	908.49677	50	91667.7	0	2293.11	2595.16	281556	27157.8	4711.11	33649.6	135304	59113.2	64571.7	32952.3
-.SIAVGMIETR.G	sll1028	2.36337e-13	2	610.84393	45	2.69134e+07	2.40502e+07	3.82717e+07	3.81868e+07	2.10929e+07	3.48202e+07	4.04127e+07	3.7264e+07	2.70333e+07	4.89225e+07	6.24549e+07	3.80121e+07
-.SIAVGMIETRGFPAVVEAADSM*VK.A	sll1028	6.93763e-14	3	928.15784	2					8278.7	4814.04	2490.53	4619.8
-.SIAVGMIETRGFPAVVEAADSMVK.A	sll1028	6.44111e-16	3	922.82855	5	17297.7	5128.55	7497.12	8191.65	4840.68	2146.74	1544.78	2335.44	10789.9	7013.57	7551.5	3468.67
-.SIGILGTK.L	sll1799	3.88857e-10	2	538.849	4					168391	402062	458155	252794	4.11958e+06	7596796	10791787	8683320
-.SIIKKPDLSDPDLR.A	slr0343	1.5947e-12	3	677.0691	18	558935	2.03453e+06	783333	1.71062e+06	1.4543e+06	3.83727e+06	3.03572e+06	6.76778e+06	66485.2	158706	126227	120295
-.SIMLQDPQIIR.F	SSR2047	1.23597e-10	2	729.4175	1									75243.4	115914	110923	89969.3
-.SIPPSALADVAHYLEEQDEGQR.I	SLR0377	1.04812e-21	3	857.0954	2	63918	19621	20753.3	46364.9	46033.2	59334	12573.9	23773.7
-.SIQEIFTK.A	SLR1970	5.5675e-11	2	627.37036	7	137641	125848	199878	126872	570188	685031	1.7699e+06	810945	2.36462e+06	2.92886e+06	9.58923e+06	4.08577e+06
-.SIVTKSIVNADAEAR.Y	slr2067	1.0142e-16	3	621.356	9	150770	1.21016e+06	15021.3	364644	175098	248343	119054	411816	55986.7	139842	39363.7	90420.9
-.SIYDPNPDQSLAR.I	SLR1385	1.36733e-12	2	810.4083	6	105635	255012	196142	255394	403059	1.2077e+06	1.69919e+06	1.12619e+06	206086	402199	507044	604378
-.SIYVGNLSYQATEDDVLTVFSEYGTVK.R	ssr1480	1.7756e-13	4	822.4229	2	9004.13	1286.52	0	0
-.SIYVGNLSYQATEDDVLTVFSEYGTVKR.V	ssr1480	2.29617e-25	3	1148.2615	20	97097.3	1453.96	0	14943.2	58452.2	20406.7	3549.51	18545.8	25752.7	2249.62	10604.8	490.05
-.SKLISFKDESR.R	sll0416	7.57113e-14	3	581.34186	2					34925.1	68903.1	64243.2	129512	48618.8	168418	59711.3	77851.3
-.SKNIVVAPSILSADFSR.L	sll0807	1.15486e-20	3	698.0709	15	110714	188467	120212	281057	37882.1	80261.5	65447.6	120131	91950.5	333900	479514	158853
-.SKQSIANLTEADLAGK.R	slr0394	1.68204e-19	2	1039.0927	13	292088	602379	626340	910089	107521	220680	159242	218069	1.11473e+06	2.04864e+06	1.82705e+06	1.70224e+06
-.SKQSIANLTEADLAGKR.V	slr0394	4.1054e-19	3	745.4324	35	386309	903426	379117	1.09419e+06	692479	1.27124e+06	1.28212e+06	2018625	1.92799e+06	5.41838e+06	3.43726e+06	3.25549e+06
-.SKTIVIDPVTR.I	sll1226	7.57685e-13	2	758.96844	2					39742.5	52613.4	68148.3	107880
-.SLDNESILLDLR.G	SSL1707	1.92099e-14	2	766.4266	6	167714	134434	199143	205315	145037	210687	341305	183793	450365	682923	839618	630059
-.SLFVAVDNIDK.V	slr0043	1.14047e-14	2	754.9357	4	310591	64538.2	23705.4	44527.8	172972	196702	11676.6	54100	258486	150353	38544.1	62190.7
-.SLFVAVDNIDKVFSLTDGGEYIALK.G	slr0043	3.25873e-26	3	1049.2565	6	67326	2820.4	4061.36	4659.72	38417.7	2190.49	1606.66	4434.5	7365.09	0	1299.94	0
-.SLILYNPLR.E	sll1514	1.67982e-11	2	616.87823	2					94347.5	117611	32746.7	99681.1	627483	532446	93204.8	475790
-.SLLVQKPEIPACAWQR.S	SLL1775	4.19624e-14	3	728.7441	4	55433	119708	129911	141966					279138	637444	689906	669054
-.SLNWISR.A	SLL0006	3.27867e-10	2	510.291	3					100210	168267	192063	148675	298287	407516	409512	296945
-.SLPAPETPLYNHPLPQLER.W	SSR3188	1.848e-18	3	772.75366	10	224081	265915	396984	213807	188625	234674	409154	229620	672089	678121	1.45621e+06	983540
-.SLPTYATLDGNEAVAR.V	SLL0741	4.34618e-18	2	911.4745	2					35493.4	72879.8	62484.2	52488.9	18064	35892.6	28945.8	32687.4
-.SLPVPSTIDEAISEAIAATQR.A	SLR1702	1.47747e-23	2	1157.1272	13	63331.8	83595.3	89875.9	84624.9	20231	44480.7	50525.5	35628.8	20233.1	57753.5	55852.9	41514
-.SLTIADYQSFLR.E	SLL1180	3.42204e-14	2	779.42303	5	155852	24057.5	140864	113626	465034	301728	391983	298310	271949	110310	188946	120379
-.SLVSLPGLPAM*ISEISK.R	SLR0743	2.14248e-18	2	1023.5911	8	20662.4	15050.8	4524.1	16880.8	28197.4	34703.3	38360.9	36711.1	26852.6	21676.4	23917.1	16762.1
-.SLVSLPGLPAM*ISEISKR.N	SLR0743	1.98999e-17	3	734.7645	7	59265.3	60665.9	59724.3	126508	110768	141626	130572	235282	248097	268914	324940	201186
-.SLVSLPGLPAMISEISK.R	SLR0743	1.05973e-20	2	1015.5947	7	34454.2	14013.7	24021.5	25445.3	18580.3	33957.3	19947.8	20214	26566.7	21966.9	16011.5	16326.2
-.SLVSLPGLPAMISEISKR.N	SLR0743	1.35918e-18	3	729.4337	1	24564.8	15600.2	16788.6	32810.8
-.SNIQEKIEQELANAR.Q	ssl3364	1.79512e-16	3	677.7069	5	70294.4	224276	97489.7	377116	35913.7	46927.1	32457	129967	154594	402252	449629	566434
-.SNLIITGIIDGPLPGGLPK.A	SLL0656	3.77916e-16	3	721.7719	1	8875.41	1848.61	3092.23	8789.48
-.SNLSIADGIR.L	SLR0938	1.25477e-10	2	595.33624	1					110206	144028	110628	124078
-.SNNLHLVNIDFTPEYR.R	SLR0664	2.90173e-17	3	692.6918	4	46647.7	41354.4	41721.4	49768.8	47544.1	61804.1	35851.5	51581
-.SNSLLTQPTQESVQQIFAR.I	sll1653	2.29541e-13	2	1146.1104	4	8078.09	15276.3	22159.9	11228.4	3169.02	6009.68	9908.2	4803.1	0	18515.3	28753.2	11401.8
-.SPNPANPTDLER.V	slr1280	1.21341e-15	2	727.8707	7					3.31321e+06	8.33917e+06	5.99495e+06	9.91562e+06	32777.9	78256.6	64072.6	96311.6
-.SPTVFKEEGYR.F	SSL2064	2.16022e-13	3	534.28955	1									108471	105456	68893.8	86008.2
-.SQDFDYDLVIIGAGVGGHGAALHAVK.C	SLR1096	6.88777e-31	4	725.6419	4	62393.9	13796	11507.1	0	102914	54711.3	52066.4	39422.2	29817.5	10252.3	21625.9	5324.09
-.SQNFFANLPK.T	slr0708	3.42642e-14	2	727.40436	1									75340.3	200731	55898	143248
-.SQTILSIK.N	slr0075	2.38641e-10	2	589.37213	3					158540	261011	329744	319905	184642	299686	307272	295680
-.SQTTATLPLPSPESAIALAGSGEDNLTYLAHHTGAK.L	SLR2047	1.38105e-22	4	977.7648	3	17084.5	10823.4	9537.18	11586.3	4231.45	6184.19	4365.78	3737.67
-.SRFDSGLPSVR.Q	SSR3341	5.49511e-13	3	455.58453	1					0	87801.3	185709	96916.3
-.SSPQVPTVFAIDDSPLNLK.I	SLR1305	1.36184e-12	3	772.7626	1									11930.6	13035.9	10507	9546.2
-.SSTAISQLQPADKR.E	SLR0038	1.34614e-17	3	597.3378	5					100180	236945	256603	302573	29278.3	53920	59022.7	53671
-.SSTLPLDLPDRLR.E	SLL1236	2.57016e-15	3	542.9811	3	44741.8	147954	157605	162292	120408	377940	846121	449133	24209.6	73509.1	74607.9	72028.7
-.SSTQDYIGEEAATR.V	slr1898	5.43069e-16	2	836.4004	3					246368	612556	1.77461e+06	1.10493e+06	18676.7	41287.6	64388.7	53930.2
-.STIASEYQPPKDQTAMLSGQISQGQAESLQTM*R.S	sll0042	1.49307e-16	4	972.2347	2	6888.08	9932.45	13269.4	0	2807.29	4463.94	13229.6	3629.29
-.STIASEYQPPKDQTAMLSGQISQGQAESLQTMR.S	sll0042	1.70842e-20	4	968.23535	1					0	0	14172.6	5606.56
-.STILVVEDEAIIR.E	slr1588	4.12633e-12	2	801.9656	1					14951.7	19915.8	8857.89	20913.8
-.STVDHAPQTSEAM*AIPK.Q	SLR0609	2.36476e-16	3	696.36053	8					19839.1	44798.3	52220.6	43909.2	15786.6	30215.1	21056.3	28889.2
-.STVDHAPQTSEAMAIPK.Q	SLR0609	1.35575e-16	3	691.0277	9	52390	117397	71689.4	74039.9	272765	554506	480136	453451	98220.7	169650	188943	155910
-.STVTESDLKELK.D	ssl5113	7.15304e-16	2	891.5131	4					92098.1	185645	456882	376750	63691.7	406063	1.02999e+06	557493
-.SVNLASQLR.E	sll1184	6.47392e-12	2	566.3332	1					165243	808077	627547	346657
-.SVNSIHLVGR.A	slr0925	1.27451e-13	3	409.24234	3	11642.2	12776.5	14411.8	17063	24417.9	28873	45092.9	45596	51939.7	48122.9	65420.1	69473.3
-.SVTIETDLK.E	SSL0410	4.59021e-12	2	647.37897	4	1.41948e+06	1.08692e+06	952534	857867
-.SVTIETDLKEILGEIK.T	SSL0410	3.58805e-19	3	740.7766	13	414284	206149	76233.3	301026	318660	351602	102241	390921	248912	228819	65523.1	146838
-.SVVLTVGDR.Q	SLR0208	3.66597e-11	2	545.323	5	169113	28402.2	130923	283188					60190	23532.4	75923.9	91033.6
-.SVVSQVILQADDQLR.Y	sll0928	3.55018e-18	2	908.0076	34	2.88705e+06	3.16305e+06	100198	1.90493e+06	498632	1.09374e+06	89858.9	396545	351147	668935	62885.2	246404
-.SVVSQVILQADDQLRYPTSGELK.G	sll0928	1.57918e-19	3	945.5228	130	3.36681e+06	8.67583e+06	74374.4	6.65264e+06	901181	3251227	182992	2.60236e+06	3.11886e+06	1.12058e+07	327184	4.52081e+06
-.SVVSQVILQADDQLRYPTSGELKG.I	sll0928	2.93062e-12	3	964.5287	1	19368.8	28353.9	7793.67	23758.3
-.SVVTLTIDDK.A	sll1223	2.51324e-13	2	689.90454	6	36610.3	50416.1	65207.9	52301.8	231244	548597	564924	468143	145949	265428	216123	176621
-.SYAIIEIGGTQIR.V	slr1678	3.5665e-13	2	782.94586	4	35615.5	12037.5	17962.4	18836	81102.2	115111	66738	77279.8	81939.3	74707.6	53972.2	51246.8
-.SYLIAVVANR.I	SLR0613	4.78593e-11	2	625.3732	2					11894.6	11106.6	7503.57	6772.12	25000.7	12261.2	12511.1	8104.21
-.SYTADSLKAELNAR.G	sll0567	6.33015e-18	2	913.9956	8	169555	517593	406978	635820	57159.2	104433	134713	180251	252791	745614	958941	772840
-.TAPFTPAEIAAEGIKPEEYEDIVQR.L	sll1056	3.01334e-19	3	1021.20233	11	151961	196430	160777	212999	124749	303764	222517	256577	155379	306368	355047	346390
-.TAPLTLNLLQGSVR.F	SLR1533	3.17373e-14	2	813.98785	2	78585.5	35570.4	118025	44915.4	90181.5	96141	144409	50077.7
-.TAPTPSSHSVPIQEFTASR.Q	sll0038	6.21768e-21	2	1079.0547	9	54437.3	90692.2	76152.2	52217.3	21212	230933	406915	356545	34959.9	112481	96927.8	65345.2
-.TAQANNTIYGFSANALDGSPVALR.D	slr1171	2.76755e-18	2	1298.1694	3	10517	2889.43	11448.7	6585.73	4331.11	3039.89	6044.4	2915.28
-.TAQANNTIYGFSANALDGSPVALRDFEGK.V	slr1171	6.5148e-14	3	1105.9	2					3234.61	8447.72	6607.69	7139.72	2377.54	0	4265.89	2165.67
-.TATILVEK.Q	SLR1549	1.49555e-10	2	581.867	2					33780.1	64349	46171.9	62732.4	258348	610881	559369	539807
-.TAVPPSCQILDGK.A	sll0753	1.74483e-15	2	837.459	7	9243.21	11639.1	13462.6	13448.3	20184.6	91183.5	106084	95364.9	118063	237938	270640	295609
-.TDLGQAGESLVAAWLEQQGGK.I	SLL0189	1.09373e-13	3	816.09924	1	30343.2	6136.59	8716.77	13302.6
-.TDLTLAALK.T	SLR0185	2.38981e-11	2	617.3865	4	112669	88675.9	130726	117525	181478	175112	296951	149640	60512.6	61901.4	55100.3	62729.5
-.TDSPDRLIATDLR.N	slr0417	6.15787e-14	3	539.6287	3	24876	47686.2	25309.4	65119.3	35901.5	95611.8	179661	91507.8	47251.2	117683	86028.2	91708.1
-.TEAKAPAEK.K	sll0272	1.77493e-12	3	459.6092	1									97.09	136.18	1995.03	921.94
-.TEANDLPYLLR.V	slr0536	5.31018e-14	2	724.8993	7	1.78291e+06	3.29045e+06	2.46913e+06	2.46892e+06	371819	610933	561149	454397	94774.7	102198	64843.9	81350.2
-.TEEQQGPNTTPNEETASK.T	SLR0476	5.38101e-24	3	750.6923	36	465.25	673.18	234.63	123.77	8184.67	1832.01	36119.1	30213.1	331.84	11098.7	24887.9	60341.6
-.TEEQQGPNTTPNEETASKTTAAN.R	SLR0476	4.32373e-11	3	903.1015	1									0	0	310.23	0
-.TEEQQGPNTTPNEETASKTTAANR.S	SLR0476	6.76278e-19	4	716.6032	15					1085.09	3041.79	1987.32	2578.91	1114.78	9853.35	13761.5	3149.84
-.TELSGQPPK.F	slr0737	1.47964e-12	2	622.8587	5	4912.65	4778.03	4872.43	3886.58	8940.83	4940.13	12962.6	10630.6	6914.25	4988.35	7857.69	12105.2
-.TELSGQPPKFG.G	slr0737	8.8876e-10	2	724.9025	1									62236.8	71281.4	94977.2	71365.5
-.TELSGQPPKFGGSTGGLLSK.A	slr0737	9.54243e-20	2	1196.6699	14	105963	622520	281489	697318	28955.4	140506	137368	161085	144409	307881	790115	612725
-.TEPPVLHETSSESEKEQSIGK.Q	SLL1053	5.3679e-19	4	686.8629	5					46768.3	48274	81579.4	49973.9	121457	111256	96436.5	118216
-.TEPVKYLIDTNVISELR.K	sll7003	2.00051e-17	3	760.10126	1									22961.8	89571.1	50845.9	34959.7
-.TESVISPEDAFNQAIAR.Y	SLL1979	1.05743e-17	2	996.50916	12	197751	301995	369108	304550	466453	481248	1.231e+06	747009	42340.4	73457.5	117367	70904.2
-.TETTITTSDNVEK.Y	SLR0711	1.06226e-17	2	863.9519	7	11986.6	8008.74	8516.73	8407.11	89898.1	58179.7	60677.8	99967.4	112630	99140.6	115625	134459
-.TEVNLSVVSCSSTGK.T	sll1771	1.39236e-20	2	928.4869	5	248018	216091	165002	198398	23714.3	43642.6	39715.1	23834.2
-.TEVNLSVVSCSSTGKTDPGLVR.Q	sll1771	8.89636e-12	3	865.45996	1									12297.6	30573.9	26673.7	23823.5
-.TEVTTTVR.L	SLR1216	2.77409e-11	2	525.7996	4	3113.81	5577.76	4850.79	5435.56	1424.74	1753.79	3652.52	4301.98	3069.66	5273.03	8905.89	10284.5
-.TFYNYTIDK.G	sll1789	2.01637e-13	2	726.8856	3	41817.8	24603.2	19257.1	23940.8	217024	358010	150541	128010	327602	155361	92798.7	154062
-.TFYNYTIDKGR.L	sll1789	1.09925e-15	3	555.964	4	65278	94117.1	119055	112559	639721	1.13373e+06	1.00305e+06	942705
-.TGQEILIRDER.K	sll6060	5.99996e-10	3	491.9415	1					76235.9	139980	131959	166628
-.THSPESNPTVSAAEAAELIR.S	SLL0102	7.75157e-19	2	1112.568	4	6109.46	15563.5	9784.05	12261.1	15469.7	27438.4	20061.2	24210.8	3574.1	11326.7	8550.45	10170.2
-.TIKPVILETLPPDLDQQR.L	SLL0506	1.27774e-11	3	789.13025	1									15173.6	25934.8	7971.64	17693.3
-.TIQLTVPTIACEACAEAVTK.A	SSR2857	4.71286e-16	2	1232.6547	2					0	0	8918.71	1678.2	1470.01	0	5989.35	0
-.TIQYTPLADR.L	SLR0168	7.88834e-11	2	661.3644	2					83385.3	24020.2	187230	56679.1	62485	22823.3	101716	45832.8
-.TISLEADLK.S	sll0454	1.87298e-11	2	639.38104	10	831087	1.82916e+06	1.42978e+06	1.7487e+06	169140	403424	292347	241331	126241	214221	172803	191324
-.TITFQAVIAK.L	slr0638	4.08066e-13	2	690.4285	1	95086.6	67812.6	111773	82388.4
-.TITFVKEQK.D	SSL3044	8.55495e-13	3	509.31497	2					160525	332247	708766	1.37124e+06
-.TITTQAQIVEMLEQLPDGALDEVK.S	ssr6048	9.41679e-19	3	977.52747	2	8079.97	5210.4	8795.12	5930.54					7475.74	2223.45	5972.48	3629.8
-.TIYALEHPLR.N	slr7024	2.09376e-13	3	452.93033	5					316610	587793	122855	573320	246744	379485	76079.4	272566
-.TKLDTTAEVK.A	sll1803	9.09275e-14	2	769.4599	13	50933.8	89001.4	43395.5	53992	80563.9	76613.9	80215.6	82423	161404	261499	215976	253045
-.TKPSNDEPPLTNVR.D	sll0184	1.42945e-12	3	619.3404	1					52207.5	113112	77724.5	98155
-.TLNLYFLR.H	SLL0395	6.99597e-11	2	592.35223	2	217060	43267.2	60996.8	95642.4	208371	69204.3	55178.7	108412
-.TLPLIAYAPVSQNQR.V	sll1471	4.45115e-13	2	908.01794	1									83516.6	18317.2	13950.9	130262
-.TLSSGLPM*GSLR.R	SLL1675	1.38232e-10	2	689.8758	2					132422	226611	417188	280013
-.TLTVAIPR.I	SLR1081	1.51258e-10	2	507.8248	1					24375.9	28879.1	26392.1	20393.7
-.TNAALDDKTIVR.D	slr0525	1.80732e-11	3	535.6444	1									55130.6	82390.9	82433.6	124765
-.TNIPYRENLQR.L	SLL0072	2.05926e-10	3	516.6183	1									21556.2	68886.5	117910	84417.3
-.TNLPEFR.H	SLR1103	2.35064e-10	2	510.78305	1									91817.6	199559	195563	199370
-.TNPFLNLTYEPALESLGNEFFDPVSAATFPEHK.L	SLL1464	1.89923e-24	4	997.0061	9	11486.8	0	6110.75	3688.05	8042.34	1941.5	2970.25	2915.82	0	0	0	0
-.TNTLTSTFADLGLSEK.R	slr0083	1.29969e-19	2	993.0335	1					23473.7	47320.5	36583.2	34022.1
-.TNTLTSTFADLGLSEKR.C	slr0083	1.49555e-19	3	714.7258	5	108346	195854	122182	222212	70754	151813	127347	190641	102411	220722	219890	240252
-.TPERVPSVVFK.T	SLL1621	2.38198e-13	3	516.31085	5					658227	834810	1.4959e+06	987340	46242.3	72111.3	124631	98115.9
-.TPSDYQDQEVK.T	SLL0376	6.21402e-16	2	799.4015	1									2162.62	3760.48	4765.94	4851.81
-.TPSPVLNLLVSNDDGIFSQGVR.T	SLL1108	9.08433e-17	2	1236.6648	2	0	0	1602.9	2331.41					4782.79	3327.88	4120.14	2618.4
-.TQISGSPDVPDLGR.R	sll1316	5.20982e-18	2	793.4175	3	217262	220596	413809	269772	320672	828554	849857	385205
-.TQISGSPDVPDLGRR.Q	sll1316	8.92613e-16	2	871.4692	7	56102.4	91894.3	64107.8	86884.2	77153.2	182712	246373	200536	104513	242352	232012	198369
-.TQSTNFDDVYPVQWR.D	slr1938	3.13299e-20	2	1000.4861	2	64500.7	91870.3	144663	81594.9	20221.1	43191.5	45184.8	23363.6
-.TQVVVGQNEPIESALR.R	ssl0601	3.00423e-16	2	942.5194	7	72839.5	105288	106593	75351.9	122678	279050	323587	171541	163378	235366	416723	290037
-.TQVVVGQNEPIESALRR.F	ssl0601	6.67778e-13	2	1020.5681	7	138933	406480	366436	367641	2.10489e+06	3.19089e+06	4.38877e+06	2.56934e+06	6530.01	6693.78	12350.9	12522.4
-.TSAEALLEQIQNK.Q	SLR1907	9.71772e-15	2	866.9864	3	33152.6	36614	64356.4	45461					141513	194006	417261	249932
-.TSIM*M*NTVQTYGK.T	SLR0607	8.83986e-19	2	897.45404	2					18300.7	34827.3	69681	60111.8
-.TSIM*MNTVQTYGK.T	SLR0607	1.47221e-13	2	889.4565	1					11888.7	15313.1	17824.5	16148.6
-.TSIMMNTVQTYGK.T	SLR0607	1.78298e-18	2	881.45935	1					42262.2	99545.6	161993	132378
-.TSLVSAQR.L	sll1579	5.46027e-11	2	503.29443	2	1056.68	748.54	351.25	27567.8					1317.09	1464.25	792.73	36040.5
-.TSPTAPLISFDQLQK.N	slr1735	3.12565e-19	2	967.54443	11	123993	311938	335040	240630	73629.9	277606	429815	229418	52026.2	206668	249085	153014
-.TSQPVPHPSAR.H	SLL0176	1.98111e-13	3	440.90866	1					370.64	731.74	297.41	544.33
-.TSTTPEIEALAADIGEQIAIDVAK.W	SLR0729	4.00359e-22	2	1372.7504	14	35187.9	3584.35	36548.7	17054.7	25108	16301.1	23694.5	1371.48	10554.1	2653.91	3727.43	1362.18
-.TTAEAASTVHTSFILK.V	slr0923	3.71472e-12	3	655.7034	1	57473.7	33064.8	20656.5	11893.7
-.TTATTTAPEFISACTK.L	sll1688	8.52885e-22	2	994.51447	7	93514.3	149602	173750	154953	58105.1	120148	102366	107714	128099	254127	288468	205046
-.TTDLSVYLDQAQQAGAESAEVYYSR.S	SLR1435	3.25538e-23	2	1455.2034	12	10140.2	6553.41	12024	10093.7	0	0	5307.84	0	3595.84	6053.56	4204.25	0
-.TTITSQAIAR.Y	SLR1826	1.49913e-11	2	603.3524	2	8438.42	16653.8	21790.4	17582.6	61247.9	118030	281633	119172
-.TTLNYVELVK.F	SLR0287	1.22584e-13	2	734.4365	5	283615	310208	323635	298800	180827	381326	351372	273909
-.TTNNSTLLDTIQQGFR.I	SLL0982	1.00783e-19	2	977.0132	33	490682	850402	1.52854e+06	923766	283124	736456	1.40132e+06	796098	180683	504317	953959	389714
-.TTPLVPPFTK.E	SLL0781	4.08561e-14	2	694.42236	6					244049	697308	1.50725e+06	918901	387709	1.04383e+06	1.91154e+06	1.43402e+06
-.TTQIPVPPVVSDQALPDR.I	slr0213	1.2039e-10	2	1039.0751	1	26290.7	19881.3	18332	13228.5
-.TTQIPVPPVVSDQALPDRISDR.L	slr0213	9.26175e-12	3	850.1333	2					16703.6	21455.1	18258.5	28154.7	17964.8	21826.8	19516.5	22459
-.TTQLDRVVLIGVAGDSGCGK.S	sll1525	8.36183e-20	2	1167.6361	7	143015	219946	200062	410052	24368.4	45188.4	11414.9	86006.3	13985	44622.4	68399.8	43781
-.TTQSLTAEFAIEQLK.I	sll5128	1.0715e-18	2	984.54895	13	38553.6	56020.6	28359.7	65229	15175	31102.1	14757.7	28231.5	25675.5	37714.4	25404.3	33655.6
-.TTSLAAIAPHGGQLINR.L	SLR1165	3.89894e-17	3	622.0221	9	72402.5	89340.1	72596.4	93117.6	314568	729231	468298	629419	531722	1.3108e+06	1.19118e+06	1.20663e+06
-.TTSLPPQYEPTVTEAK.W	slr0557	7.5709e-20	2	1025.5507	14	126657	168917	109893	163138	35314.8	64336.1	62121.2	72160.5	38282.8	62537	60602.6	73307.7
-.TTSQLNPVVTITAK.T	SLR1073	4.39192e-18	2	881.0209	3	25085.8	51607.8	31267.8	43071.8	45697	95497.8	90805.1	101916	27334.7	38936	17602.9	46710.3
-.TTTELTAATLTQLQQEINR.L	SLR1657	9.13997e-18	3	759.41345	2									27681.4	21061.6	59967	23973.8
-.TTTLDEVLDLFK.Q	SLR1818	1.53119e-15	2	841.9785	11	96035.2	121986	95357	119978	77250.7	166537	106654	108946	78331.9	151501	76961.2	65872.9
-.TTTPPVLSGPEIR.Q	sll0362	1.62621e-13	2	756.43024	2									137063	68762.1	91105.9	99587.2
-.TTVLIVEDDPM*NFR.V	SLR2041	7.34333e-11	2	905.464	1					20224.2	17810.7	21434.5	15766.4
-.TTVTDADLKELK.D	ssr5009	1.22809e-14	3	589.3467	1									30038	102235	266134	121425
-.TVASTAPAFCQGIR.F	SLL0529	4.1385e-16	2	811.9266	9	1.12096e+06	2585944	805864	2.43787e+06	576907	2.5174e+06	904734	2.68231e+06	943363	3.43983e+06	1.32897e+06	2.67002e+06
-.TVKPDWLR.V	SLR1598	5.26966e-12	3	434.93002	2					137498	260039	204728	317939	125437	238840	162213	238378
-.TVSEIHIPNSLLDRDCTTLSR.H	slr0952	5.73256e-13	3	857.7812	10	352044	310028	474087	316809	46945.2	94596	113148	78226.7	77593.3	100384	138948	54534.4
-.TVSPSYDAIVIGSGIGGLVTATQLVSK.G	sll0033	3.26821e-25	3	974.55347	1	2248.61	814.76	1495.71	1606.61
-.TVSPTTQPQTNHSLPPADAK.Q	sll1185	4.28009e-19	3	793.42303	36	7029.39	33241.6	7444.93	14387.8	203649	1.12623e+06	325005	505686	121646	793066	248551	344683
-.TVVPDYLAHLNPSQR.R	sll1143	3.70339e-16	3	618.6708	3					15067.5	29015.2	27138.5	19001.6	41958.5	114858	81162.2	82051.5
-.TVYEGSFTPPARPFR.F	sll1282	6.77927e-14	2	934.99365	6	134891	81137.1	100377	78187.1	469756	210501	297097	232046	240937	75501	157641	93853.8
-.TYCLGLINR.F	SLL0069	2.08155e-12	2	627.34296	2					111923	208415	454331	225383
-.TYFASDFQDLDNSGNIENFIR.C	SLR0407	1.85919e-19	2	1305.616	2	4122.11	6376.61	9706.49	9111.81	0	4436.5	3047.19	9820.47
-.VALQIPSLAATVR.Q	slr0077	6.19905e-11	2	741.9604	1									14790.3	20472.3	14856.6	19723.5
-.VALSSNGYFSPDDYLELESR.S	SLL0925	1.51993e-19	2	1204.0751	4	0	0	9623.82	4370.17	2395.46	9204.94	35190.4	13350.6	1803.03	3302.79	9140.5	3023.38
-.VAQIDSQQQYEQATQAIAK.E	sll1561	5.80644e-24	2	1204.6361	6	11034.7	36450.6	15186.9	54910.2	11537.4	27399.2	18458.8	32497.4	17845.5	0	0	22413.5
-.VAVAVLAAGK.G	SLL0899	7.44544e-13	2	593.8903	2					61211.5	144976	169483	135254	22594.9	28577.6	52709.5	33649.9
-.VAVKEATNVGK.I	slr1329	3.55794e-15	3	516.65454	5	958.99	3529.75	829.41	4262.59	6305.28	66743.4	15766.1	66858.4	9084.45	136178	190238	80800.2
-.VDICWEQLHR.S	sll5107	5.62934e-15	3	500.58945	1									15891.1	15372.3	27200.8	15772
-.VDNNQAQAILR.Q	SLL0414	1.78907e-14	2	693.38464	1									448070	1.3966e+06	1.95337e+06	1.7969e+06
-.VELTENHYNLQQELADALQSLGR.S	SLR0907	2.43308e-20	3	929.1479	9	55303.6	18839.8	9121.6	43930.3	27864.7	30305.1	12670.6	36694.6	23074.2	19953.2	10386	14666.5
-.VFIPDESDFDVEYR.S	SSR2554	2.50897e-19	2	937.95044	2	467815	1.08759e+06	1.18567e+06	2.10987e+06
-.VIAASPSVPCPSTEQVR.Q	slr2089	1.21329e-15	2	971.51166	6	61880.3	115415	94983.2	189621	69926.2	159502	249527	252488	12344.1	24623.3	34767.7	42067.3
-.VISELLPNLDSGLTTLR.T	SLL0895	4.53727e-16	2	993.07404	6	40093.8	31149.5	52453.4	40153	26745.8	30599.4	42979.1	38947.1	34327	45774.9	71772.4	57911.2
-.VLASSRPPSPTNSPADR.Q	slr1364	8.84822e-10	3	632.67267	1					16536.3	44567.6	41204.1	83033.8
-.VNATPFITTK.S	sll0017	1.5227e-13	2	690.4099	5					598050	922578	4.79652e+06	1683595	130226	388844	1.20879e+06	659810
-.VNPIVVAAK.Q	SLR1109	3.00556e-12	2	599.89026	1					372548	693460	716956	293809
-.VNTLEKPGFDEIRPGVK.T	sll1214	6.85776e-16	4	583.5896	2	90440	285602	152077	264369
-.VSIRPDEISSIIR.Q	sll1326	5.00325e-16	3	543.65283	46	2.59447e+06	4.08725e+07	4.19112e+07	3.56376e+07	1.04927e+06	2.15979e+07	2.63231e+07	1.78437e+07	1.70816e+06	3.00514e+07	3.12959e+07	1.81463e+07
-.VTASLPTPVQPEFDTTIHR.R	SLR2136	9.54598e-23	3	751.7374	11	108605	84523.3	101050	139804	52823.8	60567.5	79519.8	84070.7	92604.3	146458	144785	133406
-.VTASLPTPVQPEFDTTIHRR.K	SLR2136	7.42516e-11	3	803.771	1					22618.5	26135.5	33631.8	35494.7
-.VTLDKTATK.I	SLR0006	1.43201e-12	3	470.29547	8	6071.65	40998.4	16995.1	30598.2	5667.03	21742.3	16621.8	29047.3	74355.6	270161	300882	332104
-.VTLIDSPTSAAVQPR.L	SLL0217	3.41471e-19	2	849.9787	8	99423.5	163195	124678	235123	68227.7	252917	234114	344735	70866.7	215162	183524	314946
-.VTLLENPFR.T	slr1843	2.74277e-12	2	616.8589	7	284133	335143	420686	294501	862513	1.21244e+06	2.29717e+06	1.55851e+06	388522	621447	973957	498108
-.VTLSNTSM*VGGR.D	sll0851	1.54194e-13	2	691.3646	4	14323.3	19015.4	74660.4	18975.7	39582.9	45270.8	199925	69520.6
-.VTLSNTSMVGGR.D	sll0851	1.66324e-16	2	683.367	4	109627	135043	627447	104300	196859	288555	1.47478e+06	269905	244310	373034	1.08641e+06	338714
-.VTTPTAAPR.K	slr0963	4.15723e-10	2	529.30945	1	488.42	1663.11	922.84	1336.17
-.VVATQSLDELSINAIR.F	SLL1070	2.12068e-19	2	937.02783	47	1.93847e+06	1.75383e+06	2.07301e+06	1.99304e+06	1.05123e+06	1.34551e+06	1.54844e+06	1.20612e+06	1.18971e+06	1.98887e+06	1.58968e+06	1.31657e+06
-.VVNSDPDWLWR.G	slr1031	2.87764e-16	2	765.8937	4	97039	137092	140798	187428	48148.4	59250.9	92394.4	78751.2	126320	211916	240834	176611
A.AAAAAPAEAAEEKTEFDVILEEVPADK.K	sll1746	2.67022e-10	3	1073.234	2	14433	9418.08	10552.5	12418.4	11050.6	8174.99	10827	10163.1
A.AAAAAPAEAAEEKTEFDVILEEVPADKK.I	sll1746	6.65155e-16	4	873.2276	7	46053.9	28750.5	36121.8	29671.9	9867.76	4190.36	5885.15	7736.25	25047.2	10615.6	22182	14405
A.AAAAPAEAAEEKTEFDVILEEVPADKK.I	sll1746	6.30772e-12	4	855.46484	1	13567	12674	16748.8	20977.2
A.AAAITGQVADVR.E	sll1470	4.17185e-14	2	658.37616	3	59269	58407.8	91340.4	59080.8	125757	186158	233472	162058	65318.8	57866.6	190624	70971.2
A.AAITGQVADVR.E	sll1470	1.10442e-11	2	622.85706	1					28488.3	39496.6	47538	33714.2
A.AASIEESFSKQPVAAGDYGDQTDYPR.T	slr1512	1.06068e-18	3	1030.8336	3	12935.4	31143.5	18019.8	33452.2	6623.33	22464.4	16610.5	22310.4	11076.8	19144.3	13597	17100.1
A.ADFNPQTVPPTR.E	slr1254	3.42539e-12	2	743.8926	1									26673.9	24282	42870.2	27313.9
A.AEM*SAGLGAAFR.L	SLR1793	1.59651e-11	2	670.8401	1					23274.5	129945	74481.8	75846.4
A.AEMSAGLGAAFR.L	SLR1793	2.75779e-12	2	662.84436	2	125304	213177	148196	139741
A.AESSTGTWTTVWTDNLTDLDRYK.G	slr0009	3.18975e-26	3	983.49023	3	19544.5	8604.39	22319.4	18314.6	22739.3	14064.2	21971.9	12068.1	20442.5	16070.5	16759.5	8898.22
A.AETEIHTFDDIPM*PK.L	sll1785	4.46849e-17	2	1024.5151	28	431930	804683	626709	586422	525060	1.10849e+06	1.18788e+06	799593	760507	1.73605e+06	1.66473e+06	1.27126e+06
A.AETEIHTFDDIPMPK.L	sll1785	8.83024e-18	2	1016.51843	15	583550	1.30434e+06	1.13017e+06	707144	671496	1.67112e+06	1.46375e+06	995302	633457	946314	972994	688927
A.AGDYGDQTDYPR.T	slr1512	4.02568e-16	2	751.3366	2					11666.8	31662.1	13111.4	42045.4	9567.77	32636.2	11486.1	34681.4
A.AIMNEGENLLYLAR.K	slr0737	5.79475e-10	2	875.96844	1					19306.6	10388	11177.5	10101.9
A.AIPLFNATCPGEIEVHADQGGPIFINGK.K	SLR0334	6.05687e-11	3	1085.5631	2					71881.5	174471	63205.6	62164.9
A.AIPLFNATCPGEIEVHADQGGPIFINGKK.A	SLR0334	1.73596e-12	4	882.22235	5	234908	446009	206904	176096	152180	703952	42264.3	267522	55928.5	106902	54295.6	23493.6
A.AISINVSTVKPLGDR.V	slr2075	2.01021e-11	3	620.03687	2					22375.4	21935.5	30737	21431.8	20237.3	24570.6	25618.5	14315.7
A.AITM*TLAELGGAK.A	sll1099	2.59156e-14	2	790.4519	4	42843.4	27727.9	20026.2	30425.1	50133.6	96325.9	39584.2	100713	14891.8	21451.8	24033.2	19229.2
A.AITMTLAELGGAK.A	sll1099	5.06722e-15	2	782.454	5	117899	117443	99070.9	133624	91516.8	88920	97374.3	70085	332201	504804	338245	363667
A.ALDSLNAAAGR.W	XXX_SLR1787	4.95586e-10	2	602.3407	1					22729.6	38074.9	25212.5	31908.3
A.ALPPQYQNVK.D	SSR3402	6.32737e-13	2	723.42096	2					21201.1	52684.8	155460	35536	33889.3	94149.1	214362	116187
A.ALQM*TSRPNLTENLQEAEELIDLAVR.Q	SLL0601	1.56762e-16	3	1038.8824	3					46154.1	8921.59	3192.42	9747.82	13799.9	1175.31	0	0
A.ALQMTSRPNLTENLQEAEELIDLAVR.Q	SLL0601	2.51832e-12	3	1033.5502	1					7897.9	1190.05	0	1714.19
A.APIIPNANELAQAVQEIESLDAM*R.T	sll5034	1.4767e-21	3	918.4824	47	124654	55626.7	86528.5	95243.3	113283	118972	47682.5	32674.4	89285.1	63735.2	40215	46785.9
A.APIIPNANELAQAVQEIESLDAM*RTGLASSLEGR.T	sll5034	6.37633e-16	4	931.9895	1									1746.8	2080.22	2795.54	1663.76
A.APIIPNANELAQAVQEIESLDAMR.T	sll5034	6.39566e-23	4	685.1147	30	52563.4	46527.5	42290	20009	30658.5	72819.2	31901.4	42391	28550.7	45505.9	42988.7	14899.2
A.APVETPASAPVAPAPK.A	SLL1873	1.33032e-17	2	896.0154	1									31061.7	83588.2	10865.5	54539.4
A.APVPASTYK.T	sll0173	5.41123e-12	2	611.3568	3	1525.06	2680.54	2151.69	2149.65	13265.9	25112.8	25427.4	21265	79901	172598	205078	178520
A.AQMPQYQEIVDSTLLK.A	SLR1793	4.04366e-16	2	1077.0841	1									4954.98	11924.7	16042.5	6313.87
A.ASLSQQINNPER.S	SLR0741	6.37183e-14	2	750.89636	1					2307.88	3293.24	6202.22	3441.34
A.ASSSSVTGGASAFENMVLAETDFR.D	SLL0577	1.12585e-20	2	1289.6165	3	5000.74	3512.69	10991.8	4604.9	2992.99	3526.02	6367.28	0
A.ATATGALFLK.G	slr0040	3.07313e-10	2	640.89417	1									21990.7	19136.5	80018.8	114785
A.ATDQILEQLK.S	sll1746	1.25068e-11	2	723.9234	3	281079	352357	430793	451210					20224.4	29682.3	37314.8	20999.3
A.ATEAGFTADIPSSTSR.G	slr0040	3.19712e-15	2	877.9372	3	74415.3	86411.8	40412.1	133074	29628.5	50320.8	55329.2	70891.2	35620.5	68941.9	32515.5	48857.1
A.ATSTNTSTASEGFQPDPR.W	SLR0193	2.97318e-15	2	1005.9753	1					0	1718.32	0	0
A.AVDPTFILAGEKLS.-	slr1368	1.56763e-11	2	875.0065	1									48421.4	50800.9	131802	47769.7
A.AVDWSDDLKQQALR.E	SLR1541	3.03111e-10	3	645.0139	1					7324.05	1927.52	7171.44	2888.89
A.AVEAAGDVGETPEGLEK.V	slr0447	3.26666e-20	2	980.5091	1	16396.7	23920.5	50618.6	22458.8
A.DDFANLTPCSENPAYLAK.S	sll0819	2.05022e-18	2	1157.5665	62	1.66756e+06	3.19602e+06	1.91014e+06	4.08856e+06	830761	2.06379e+06	3.92824e+06	2.64668e+06	759310	4.51272e+06	5.00405e+06	5.64402e+06
A.DSPLTSTDLAGAYSDIAAVEWAQQYR.I	SLL1570	2.91849e-25	3	991.48627	8	11343.8	0	6009.94	0	11687	7460.28	7826.34	13771.2	10601.2	6012.2	10293.2	4888.75
A.DTPGEQQEINLYSSR.H	slr1295	8.23392e-19	2	940.9583	4	26803.9	25235.8	120619	42943	17937.1	22322.6	134266	40011.5	19746.3	19748.7	119768	34643.5
A.EACVESLFSPSAK.N	sll1218	2.02706e-15	2	856.9441	1					26484.3	19480	32226.2	30787.6
A.EAVAVTLGPK.G	slr2076	3.44676e-12	2	636.8916	2					185492	143453	153821	124388	307706	289693	226096	427112
A.EDVKGADDPIVVAGNIK.V	SLL1783	6.14259e-17	2	1086.6134	8	71645.4	318865	235426	280972	83888.4	197684	243535	254105	291337	887260	1.13535e+06	776774
A.EGANVFANNPEMETLTWSPSKETEGK.A	SLR1667	9.89741e-12	3	1100.2125	2	0	0	24091.3	0					0	0	26097.8	0
A.EGIPQEILNK.I	sll1314	7.65708e-12	2	714.91876	9	3.22292e+06	3.41599e+06	4.42195e+06	3.60426e+06	1.69207e+06	1.61141e+06	2.98044e+06	1.48489e+06	1.35299e+06	1.48231e+06	1.98786e+06	2.2527e+06
A.EGQSSAIDQVTSVSELR.D	SLR1841	6.76875e-16	2	974.9938	1	25026.2	23389.3	23423.6	23177.9
A.EIAGYFDR.A	sll1577	2.46076e-10	2	557.787	2					2.74112e+06	0	0	6723921	6.75244e+06	0	0	7737880
A.ENSANIVTTESGLQYIDEVVGEGPSPTK.G	slr1761	2.03754e-25	3	1074.879	4	0	6842.69	6364.3	3206.23	3388.72	3203.03	1589.43	1775.74	0	2865.45	0	0
A.EPEPTPGDGASQPSTGGEGGALK.L	slr0559	1.6688e-16	3	809.73474	7	204.19	4957.96	358.43	994.11					3429.07	4394.43	4682.82	4695.18
A.ESLPDRWEAYPQWSNLPTLEQR.K	SLL1123	5.65099e-16	3	953.81024	4	27679.7	23082.1	32902.4	24170.8	30622.2	43244	51827	29501.3	6504.15	10121.2	16546	8650.24
A.ESSTGTWTTVWTDNLTDLDRYK.G	slr0009	4.46222e-10	3	959.81146	1	14569.4	4304.81	12117.4	10727.8
A.ETCAPLPPQVSSTAGNTVR.V	sll0172	3.31476e-21	2	1065.0428	30	180031	338939	266563	252856	110435	200545	176619	139512	117416	323361	365903	315812
A.ETDFNSFWQQFK.T	SLR0699	5.3507e-16	2	932.9595	4	39489.9	30320.2	47129.9	28130.3	38878.7	39188.5	66182.4	39233.5	141893	134413	316305	142364
A.ETEIHTFDDIPMPK.L	sll1785	5.61466e-13	3	654.3355	2	31830.9	89658.3	34648.7	72541.3	26130.1	102580	81904.9	97353.8
A.EVSEPEM*VLK.I	SLR0535	1.8893e-12	2	732.8944	4					112374	285456	328891	235916	50092.5	117482	134933	116141
A.EVSEPEMVLK.I	SLR0535	4.49391e-13	2	724.89667	3					103380	492781	548515	326485	201599	691103	783430	573833
A.EYGEQREAIFAVTIPEQR.G	slr2072	6.634e-14	3	760.4013	1									4849.22	6894.12	9461.25	7286.68
A.FEPAEAIK.V	SLR2101	6.06981e-10	2	596.8434	2					371287	482764	615890	178324	450246	466075	432055	271239
A.FEPAEAIKVETILK.T	SLR2101	1.7408e-15	2	1010.60767	3	64908.6	64810.7	84229.6	30946.8	59912.5	97754.4	74704.1	47685.7	25383.7	45729.2	28893	18090
A.FETPGKDVLIMLR.T	SLR1407	8.34567e-12	3	603.01965	1									24104.7	22634.4	13218.4	12747.6
A.FYDYVGNSPAK.G	slr0906	1.05754e-14	2	775.3981	1					32448.5	53019.3	69831.1	57003.5
A.GDISPEM*M*PETANIK.L	slr0040	1.67959e-13	2	976.98	2					4957.56	9694.24	5387.58	33461.6	5424.47	11214.8	9270.87	31340.1
A.GDPFRPNNPHNIGDQTEAAFEAIFR.D	sll0314	1.2862e-22	3	986.4861	12	128045	21423.2	24027.7	45320.5	72439.1	52147.6	24119.9	56534.8	59655	31443.2	24311.5	12668.7
A.GDVGETPEGLEK.V	slr0447	8.67972e-12	2	759.898	1					7193	7384.92	19343.4	9572.16
A.GDWNQFDVCVTELK.R	SLR0420	5.23023e-18	2	999.9963	10	100451	67380.4	107294	73207.6	51849.4	69400	105895	48380.7	59897.4	104400	86829.7	65786.9
A.GDWNQFDVCVTELKR.N	SLR0420	5.76609e-19	3	719.0317	5	38299.7	25204.9	48936.9	29094.1	194395	397385	147940	242762	136956	208529	199032	139238
A.GDYGDQTDYPR.T	slr1512	5.65031e-15	2	715.81757	4					21256.3	50693.6	30054.5	32277.1	24662.1	114489	40162.8	49938.1
A.GEVLDRIEQTGVINAGTR.K	SLL0224	4.38472e-19	3	691.3791	7	50991.8	58866.3	68732.4	84815.9	269927	436613	123346	265674	15780.3	18282.2	20839.7	22860.5
A.GEVLDRIEQTGVINAGTRK.D	SLL0224	8.22293e-16	4	586.8339	5	33043.4	44593.6	41790	46677.2	33123	54694.3	33048.1	71248.5	83466.5	136526	79440.7	107088
A.GFPLYDHLR.I	sll1931	1.08873e-11	3	421.23138	4					45957.5	89595.1	85866.7	46845.9	128140	52459.5	205442	51692.6
A.GFTKALEVLEHLLEER.L	SLR1793	1.02763e-10	3	725.0792	1	12898.4	3635.2	6409.96	4304.43
A.GGSSAGGLTPEVIATVR.G	sll1031	1.57105e-10	2	858.4757	1	62637.1	60762.9	80857.2	59705.6
A.GIFESEQPSDTDLGAKEPLDVK.V	sll0427	1.57057e-15	3	936.49426	1									22900.3	17480.9	24606.2	15141.8
A.GKIQYCYPVEK.S	SLL0630	1.74388e-11	3	606.3375	1									44352.7	103052	122223	59206.8
A.GLQEATQLYLQEFPLPETSPR.F	SSL1376	2.88494e-16	2	1281.1738	3	0	2256.64	2429.74	0	0	0	5254.73	0	0	0	6079.36	0
A.GQERLKLALDQGLK.E	XXX_slr1887	3.70972e-10	2	1000.60223	1	2649.02	3177.81	0	3818.38
A.GQLVNWNFNASQNR.L	slr1744	1.56715e-18	2	896.4548	5	201395	272796	237226	313705	52844.8	71742.8	110985	78441.6
A.GTLNGAGASFPAPLYQR.Y	SLR1247	5.91801e-12	2	932.9883	2	50021.3	77253.4	45293.5	126455
A.GVEGSVIVEK.V	sll0416	5.15937e-12	2	652.8861	1	47866.1	50976.8	49494.6	73546.6
A.GVPADRQPEAETLLGSIK.T	SLL0408	9.02488e-13	3	724.07556	1									17157.2	19427.2	22433.1	16875.3
A.ISPLVEGENAPEVTTAK.L	sll1450	6.34788e-20	2	1022.06335	1					3094.11	7386.74	64695.3	10706
A.ISTLDNFPHPNIEK.T	sll1784	2.42286e-17	2	957.0203	15	552554	895173	593527	715470	335609	982829	597779	501796	277991	768727	268845	663273
A.ISTLDNFPHPNIEKTEK.I	sll1784	7.59409e-18	3	805.77997	14	271324	1.27203e+06	441917	1.0258e+06	574740	1.71728e+06	1.11891e+06	2.22969e+06	16718.8	52013.4	43460.1	37562.7
A.KDVLLQVGVVQR.F	slr0191	8.21786e-11	3	548.0129	1					19194.2	29186.5	32777.2	40741.1
A.KEIELEDHVENTGVSLIR.Q	slr2076	3.71187e-12	3	790.437	1					46152.2	33422.3	34847.3	43156.6
A.KEIELSNPEENAGAK.L	sll0416	8.92456e-16	3	687.7103	1									30751.1	29686	36921.8	43520.7
A.KFDETAEAHIR.L	sll1744	1.75805e-10	3	535.62146	1					2612.78	2218.16	2250.73	2402.48
A.KGELTATSR.T	sll0018	4.60946e-11	3	417.58206	2					2614.2	1745.7	1878.53	4204.65	1959.51	968.6	3459.33	3313.92
A.LEACVQAR.N	slr0009	1.44108e-10	2	545.7938	1	21732	15012.7	14574.7	17854.2
A.LEETPVLPAEIAIK.A	sll1307	1.13963e-15	2	906.0428	11	496877	528854	310949	639501	130637	115607	116040	82767.7	108696	63214.9	60876.6	69023.9
A.LETEIDGRPVR.M	sll1883	8.12602e-12	2	714.8994	3					208643	206958	297534	320088	325618	129901	476704	216715
A.LGIGLDSEEQGVNPLM*VDVK.G	slr1136	1.40918e-16	2	1209.1447	8	36854.4	13076	83152.9	41696.8	2310.08	3565.23	45436.3	10138.7	18302.7	0	42102	29530.2
A.LGIGLDSEEQGVNPLMVDVK.G	slr1136	1.30989e-18	2	1201.1477	5	5022.92	0	20156.5	6539.33	15174.7	17271.6	79865.1	13171.2
A.LGVPGASVAAGVQK.M	sll1577	2.39727e-16	2	771.4681	11	3.72737e+06	71988.7	269391	2.18321e+06	1.23834e+06	16932.6	69137.9	1.41006e+06	545852	62123.3	84902.8	393569
A.LKFPQANTDRGQTATSGGGGVR.Q	SLL0645	3.43099e-17	4	627.3386	2					15436.2	35490.3	53382.6	29386.7	12026.5	36933.5	45858.7	21711.2
A.LMDAQGIDLDSSASGQGR.G	SLL0822	4.8916e-20	2	982.9761	1	41659.3	31097.4	29153	38646
A.LPTEEVVK.I	slr0924	3.54439e-10	2	601.8633	2					810519	1.67277e+06	1.58812e+06	991233
A.LSQTFIEPSR.S	SLL1783	1.09911e-10	2	661.3648	1									72603.2	120256	84247.8	96253.1
A.LYQEIRTPIFEQTSLFER.G	slr0357	3.70868e-10	3	805.42676	1									9369.27	14017.5	2245.56	2032.51
A.M*ENIVNNVEEYLLSR.E	SSL1918	5.89678e-11	2	992.4944	3	17523	13872.4	26838.9	19675.9	13591.9	38693.4	34671.5	19319.4	11745.7	19873.2	12207	13087
A.M*ENIVNNVEEYLLSREER.I	SSL1918	7.20821e-14	3	799.7334	6	144833	56275.1	83429	126116	41081.6	36043.4	31758.5	70603.4	56323.7	43162.4	58946.8	31164.2
A.M*TGPGGTEALPADTDSSYRDDR.Q	SLL1830	4.43804e-14	3	824.7065	1	7036.63	19263.9	17600.3	9973.37
A.M*VTPFNADGGVDYGVAEK.L	slr0550	1.24017e-14	2	1088.0391	1					6235.79	0	2335.62	0
A.MENIVNNVEEYLLSR.E	SSL1918	3.83202e-18	2	984.0091	12	144953	45729.9	118022	85575.4	41381	72115.4	37053.4	39141.8	110544	163947	79129.4	96899.1
A.MENIVNNVEEYLLSREER.I	SSL1918	5.36216e-17	3	794.4031	7	117149	85677.7	83850.4	136916	44836.5	38509.5	14564.3	65419.8	273637	271417	322899	94101.2
A.MVTPFNADGGVDYGVAEK.L	slr0550	6.63737e-18	2	1079.5392	1					21631.2	4989.25	10960.4	11929.5
A.NLNDLVSKAEDPEKVLEQAVIDMQEDLVQLR.Q	sll0617	1.01215e-12	4	996.5298	1					2848.47	1948.71	1125.96	1006.05
A.NLTPCSENPAYLAK.S	sll0819	2.13147e-17	2	933.48676	4	45512.8	46511	43739.8	68685	34426.4	33006.3	40921.4	43394.2	61769.7	84373.6	73715.5	100495
A.NNLPAEGTLIR.I	slr2005	3.68908e-11	2	671.3839	1					74247.6	79314.8	165746	68148.5
A.PAEAAEEKTEFDVILEEVPADKK.I	sll1746	7.50308e-11	3	1045.2262	1	4940.01	0	0	2601.46
A.QDSPSSLSQEALTIAHLQGVQER.R	SLR0398	6.24481e-12	3	879.7865	1					6974.77	8911.85	10683.5	13101
A.QSVREMKEVASGLMSSDDAAEASAYFDFVIGK.M	slr2067	3.46791e-11	4	968.7442	4	9685	4508.66	3938.49	6000.86					4406.68	4760.56	471.52	3767.82
A.RFDPQTKPDDTNLK.A	slr1992	6.40452e-14	4	527.54456	1									104585	45199	87601.1	45794.9
A.RSVNQSPIQLEVIK.S	slr1410	2.08422e-11	3	633.71436	7	105350	92400.3	69321.9	108146	147559	152281	244603	178051	131401	183935	190625	161770
A.RVDNLETRTAYLEDNQFSTTTK.L	SLR0042	3.06435e-16	3	964.1653	1	0	9544.41	8513.91	0
A.SALCGPEGYPHLIVDGR.F	sll0819	2.08582e-20	3	662.33887	3	50460.4	25990.9	56113.4	37896.4	48569.1	31984.7	34912.7	30683.6	44420.1	28962.5	27785	24477.2
A.SAYFDFVIGK.M	slr2067	4.86287e-13	2	717.89636	3	117224	32287.9	8798.54	24943.3	1.12576e+06	956556	0	541328	138664	43782.4	42750.2	42256.3
A.SDLDAATQAQLAR.G	sll1326	1.2286e-14	2	752.39685	1	10938.5	46956.1	41185	44437.5
A.SGLM*SSDDAAEASAYFDFVIGK.M	slr2067	1.23898e-18	3	862.41736	9	14958	7978.59	8737.89	14173.8	22261.9	27035.1	17254.5	25574.4	7087.83	3970.37	3688.28	3338.37
A.SGLMSSDDAAEASAYFDFVIGK.M	slr2067	1.2509e-24	2	1285.1224	19	33364.1	17923.8	9779.47	24323.7	47449	46236.1	13261.6	42307.3	2490.21	1754.45	540.91	1898.88
A.SNAWAIAPK.Q	SLR0378	2.62364e-11	2	623.3619	1					75169.5	85185.6	138989	111294
A.SPSFQLSPM*EM*R.L	slr1668	2.3739e-12	2	793.3765	1					13058.6	21166.2	31157.4	29696.5
A.SPSFQLSPM*EMR.L	slr1668	4.82926e-12	2	785.3798	1									27188.6	53222.9	57486.3	80858.1
A.SPSFQLSPMEM*R.L	slr1668	3.05046e-12	2	785.3791	1					12767.1	19251.6	34402.6	23965
A.SPSFQLSPMEMR.L	slr1668	5.43892e-13	2	777.3826	3	161424	214411	187215	261516	114112	186780	159859	186156
A.STFTETAIDQTEVIAVARPYGVETTK.Y	sll0319	5.04741e-19	3	1039.2194	2	70092.6	24766.1	22911.8	38168.8
A.SVAAGVQK.M	sll1577	3.18683e-10	2	524.32324	1									3174.55	1056.48	1455.71	11908
A.SVISANAATIVK.E	slr1986	2.7431e-14	2	731.4458	1					49650.6	152021	35408.2	92185.6
A.SVISANAATIVKEAVAK.S	slr1986	5.79658e-13	3	701.7582	1	9082.75	10258.7	3138.68	10707.1
A.SYEAEWNQAFAQYK.T	SLL1070	7.83872e-18	2	1011.99347	4	98960.1	105088	117596	149945	11831.5	12132	14091.7	15244	15370.5	18520.5	27958	16716.2
A.TAVPATLSWSPK.V	ssr0390	2.27404e-15	2	773.44696	5	144552	113599	57607.3	150499	58079.6	55223.2	67751.4	76084.4	288907	450447	262821	431234
A.TEPTQTQLQTAAK.L	SLR1576	2.7145e-16	2	852.9704	3					7213.04	23513.3	40107.8	38451.9	0	3660.62	3783.31	7435.22
A.TESPIPLTDEQLEVGDSLTDK.A	SLL0886	4.11953e-14	2	1288.165	2	67342.5	43096.8	45274	15468.1
A.TFTGDASVLEDR.C	sll1577	1.16291e-14	2	727.86536	2	104694	22179.4	17350.1	212594					63598.6	19760.3	18913.5	110879
A.TGVYDLPILSPGSK.T	SLL1390	8.19291e-16	2	867.9975	19	385526	911188	801020	743942	198706	542847	807238	331847	96417.7	485731	624147	364172
A.TLDNQNIYTPSASNIR.G	SLR1407	7.43329e-16	2	976.0021	8	172260	183233	117068	198608	263114	245153	168815	319727	465301	562034	413454	558171
A.TVENTLFEDGEDSNTFR.A	sll0849	3.26264e-15	2	1059.4908	1					3133.91	3939.13	8419.05	5874.48
A.TVSSGNDPEVGAMIADAMDKVTK.D	sll0416	1.34096e-15	3	923.47723	1									2256.74	6263.8	2596.84	1865.25
A.TVTGVEMFQK.T	sll1099	2.35356e-13	2	714.8923	1	19664.9	31686	30570.4	41972.9
A.VALPSAADKFR.T	sll0427	1.56762e-13	3	488.2919	1									67368.2	210596	241521	135165
A.VANTNSPDQTLPVLVCFSGGEEIFRK.N	SLL1613	1.15023e-18	3	1056.549	4	9803.39	7487.71	10497.6	12317.6	12352.8	20408.2	11523.2	11700.5	7041.85	12569	10775.8	7308.51
A.VATLDNQNIYTPSASNIR.G	SLR1407	2.06856e-16	2	1061.0557	3	62249	85849.5	29584.7	68458.3	0	19638.9	0	0
A.VDDYIDTPEREVDKPFLMAVEDVFSITGR.G	sll1099	4.43873e-13	4	911.9576	5					60704.3	0	0	13483.7	177237	7078.33	2153.54	1609.62
A.VDKSQLTYDDIVNTGLANVCPEISSFTR.G	sll0427	1.09922e-18	3	1144.2528	80	4653.23	13480.9	7544.85	0	25396.8	30264.1	25004	16761.6	10400.6	16064.6	22276	2973.57
A.VELTESTR.T	sll0258	3.91083e-10	2	539.79584	11	194681	475890	554958	209944	149783	204416	695627	199764	147400	271740	693316	241695
A.VINSADVQGK.Y	slr1986	4.48512e-10	2	660.37787	1					169986	71887.6	39380	92022.6
A.VLPIDFSPEVEPFR.E	slr1839	7.11951e-15	2	894.98755	1	109223	7373.71	37302.3	20453.1
A.VLPIDFSPEVEPFREAAEGLNRR.-	slr1839	7.79981e-13	4	697.1255	2					59228.4	42098.6	40846.9	41211.7	23241.8	3825.57	19738.4	7525.5
A.VLPVEYTEK.V	slr1838	1.35059e-11	2	683.3967	1									266272	52442.5	781693	231023
A.VNNPELLPK.E	SLL1071	2.7731e-11	2	656.3968	2					88373.5	134007	241974	117989	86621	141526	184310	122115
A.VNNPELLPKEK.T	SLL1071	1.97957e-13	3	571.6798	2					21125.8	30639.7	41224.4	49246.7	20598.8	80401.3	185949	64072.9
A.VPITYYGQK.G	SSR0693	6.3622e-12	2	678.8912	2					49156.1	96287.9	121427	48935	88827.9	179210	219331	191141
A.VPITYYGQKGEYTVDYEAGTYR.G	SSR0693	5.01924e-19	3	954.4791	1					33441.1	114211	84164.8	129177
A.WM*APQDQPHENFIFPEEVLPR.G	sll0849	1.57662e-16	3	914.1101	1	22393.9	9673.19	21227.7	11324.5
A.YFDFVIGK.M	slr2067	9.88045e-11	2	638.8625	4	452241	183867	28121.3	161278	503552	580339	0	270241	112694	39706.6	6855.75	37414.1
A.YLKGAEAPGVSEPVK.A	SLL1621	3.14754e-18	2	989.07074	2									17801.5	35185.7	345388	71656
A.YPFWAQETAPLTPR.E	sll1317	3.99336e-18	2	910.9768	26	3.65753e+06	5.29616e+06	4.38748e+06	2.95714e+06	687009	967144	1.04281e+06	489709	382791	563268	668658	283261
C.AEPEPTPGDGASQPSTGGEGGALK.L	slr0559	1.71617e-10	3	833.41376	1	519.15	979.33	1265.15	1439.54
C.AYQPEDFSAK.I	SLR0907	2.54961e-13	2	722.37067	2					56157	105103	52415.9	56361	58956.5	86820.1	39535.3	68178.3
C.DESGTDLGQNLIQAAK.I	SLL0550	1.05752e-18	2	974.51434	3	24118.2	31115.9	31078.2	36777.4	5654.81	8515.71	11209.6	10589.1	19083.3	29059.6	38557.2	42719.2
C.DIDETQNTTVNYPILADGDKK.V	slr1198	1.07218e-20	3	928.1537	1	13493.2	17048.8	18275.9	14438.2
C.DPDVVDVPIPANDDAIR.S	sll1260	6.61984e-10	2	982.5045	1									15394.1	20791.7	26994.9	28376
C.ETACPTDFLSIR.V	ssl0563	2.88142e-11	2	777.39276	2					14408.3	18692.6	23551.6	22298.3	17998.1	27430.3	34803.2	23570.3
C.EVQQLLGDNQVR.A	slr1329	8.39992e-14	2	771.92096	3	31162.4	94876.4	123743	72246.2	13368.2	44878.7	43583.2	21929.2	15056.8	82041.2	61228.8	52112.5
C.GAVESLVIDGKEEFVK.E	slr0585	2.34284e-12	3	718.0783	1					36665.7	52960.2	29167.2	36643.3
C.GAVESLVIDGKEEFVKEYAFR.S	slr0585	3.20539e-10	3	939.849	1					4457.52	0	0	7802.51
C.GITPGTLMEGVR.F	slr2094	3.72987e-14	2	687.87994	3	207082	174912	142177	134939	85678.8	75595.4	67141.2	46878.2
C.GLTPQYSGLVALDKAYGEK.G	slr1992	1.13125e-21	3	814.79065	1									17526.2	28672.9	60274.6	21120.7
C.GLTSVQSGMDNVR.N	slr0898	2.72737e-11	2	754.387	1					31017.6	62470.8	88296.7	40700.4
C.GSGGVEPQSETNWR.Y	slr1463	2.77841e-11	2	824.39636	1					3136.6	3599.03	6309.96	4334.43
C.GYVYIPSQGDQK.T	slr2033	1.38386e-15	2	821.9363	1					28264.5	46922.9	67629.4	29330.5
C.IRDLDYYLR.Y	slr1986	4.55374e-11	3	457.58945	1					21972.3	33635.2	0	11915
C.IVFIDEIDAVGR.Q	slr1604	2.43855e-12	2	745.9226	1	36296.2	6093.71	12378.3	13782.6
C.IVFIDELDAIGK.S	sll1463	1.11902e-13	2	810.977	2	19528.1	8316.4	20751.5	9886.29	33757	38966	27360.9	16697.2
C.KPETLSPALENIDAVIDASTAR.A	slr0399	9.95859e-16	3	867.14526	1	11208.4	6461.9	8162.33	9761.5
C.LGGHFQGQLIYDPEVVK.T	slr2094	1.07089e-12	2	1094.5992	1									1659.72	1186.78	0	898.57
C.LGSLETGQGEAEDGHGFEGK.L	sll0018	2.35474e-22	3	769.37756	1	42438.2	27219.2	38426.9	21557.2
C.LVADYGIPVYAIKGEDNETYHR.H	SLL1234	1.76959e-17	4	703.6206	1									33856.9	31615.7	30277.6	27988
C.LVAGGTGPLDEYLIAGIDEINR.T	sll1578	7.96802e-22	2	1215.659	5	46128.1	0	1865.36	8222.81	62010.2	0	2469.45	8274.69	22766	0	0	4868.17
C.M*VPDPNTATIDPFCKEPTLSMICSIKEPR.T	slr1756	9.58723e-11	4	949.7351	1									8123.02	9291.74	16828.3	6561.47
C.PPRPEAIFDAIIK.L	slr1280	7.76266e-10	3	585.6848	1					32430.2	48129.2	27287.3	30407.4
C.SAEVLYGHTFCGPEGC.-	slr1513	3.55652e-16	2	964.4235	3	28025.7	22119.7	56623.1	23079.1	27343.2	19794.2	38432.8	23914.7	41815.6	41346.7	40426.7	62407.3
C.SAIVAEIAGYFDR.A	sll1577	2.37172e-13	2	778.4175	1									10878.5	1918.75	799.09	16106.3
C.SDDTYILDAAEEAGLDLPYSCR.A	ssl0020	3.21119e-17	2	1309.6096	3	5491.54	0	7229.17	5812.83	2896.69	0	6219.9	3859.59	3635.08	2890.28	5868.17	0
C.SDGLTEEVPDNLIEK.I	sll1771	2.30278e-12	2	974.0094	2					11538.4	13515.1	27764.4	12435.9	9602.29	18753.5	29836.2	23229.1
C.SIPYTSLSDNVLTTIR.Q	sll0370	8.60538e-15	2	962.5276	1					12189.4	18809.4	14114.8	13305.3
C.SQLADELKELGFR.F	sll1789	5.25511e-13	3	598.67175	1									33491.5	53565.2	53038.6	33084.8
C.SQPADDESTIALASDR.M	SLR1894	1.64633e-18	2	910.44196	12	230521	441609	373432	373827	200099	259363	405088	262507	140666	244614	254451	175760
C.SVENETMIVETAR.R	sll0934	5.8468e-13	2	811.91266	1									90138	133724	105910	91671.5
C.TITGGM*FSSDSTTAVR.G	slr1280	3.18096e-11	2	896.4366	1					6876.98	5452.01	6975.77	5428.67
C.TITGGMFSSDSTTAVR.G	slr1280	1.03373e-14	2	887.94116	3	139159	76078.1	126513	112727	53027	65121.8	53684.5	32812.7
C.TVAPGFDFQDFELANREDLLK.L	SLL1188	6.46167e-20	3	905.14154	3	77300.4	43339.5	73373.2	49545	18632.8	36979.5	19494.7	16767.1
C.VDDETHETIAK.G	SLR1852	3.55383e-10	2	773.40643	2					8486.21	9954.21	12956	8990	20720.1	13266.9	11396	18299.2
D.AITAVINSADVQGK.Y	slr1986	5.71517e-12	2	837.9833	1	11753.4	18423.4	17610.5	21950.6
D.ALQQVYRRFDELVESYSGEDLTDYNLR.R	SLR1623	2.45987e-12	4	856.6804	1	40263.1	7465.71	36920.4	32081.5
D.ALSATVAEGNKR.I	sll1577	3.34071e-12	3	502.29544	1	5671.8	883.21	214.78	16146.2
D.AQGIDLDSSASGQGR.G	SLL0822	1.37221e-15	2	803.4003	2					33175.8	29001.3	39826.1	47059.1	53490.1	58411.3	63762.7	89019.5
D.AQLIGCPGCYPTASLLALSPLLK.Q	sll0080	7.50993e-12	2	1365.7461	4	8262.83	2817.8	5531.69	14633.6					0	0	0	0
D.AQQHRIAEQNVVEIDVFR.R	SLL1021	1.03624e-16	3	766.4105	1					12171.9	5616.37	5210.42	5925.31
D.DGTYSPVEVK.V	slr2075	4.309e-13	2	691.87177	1									14142.4	21519.4	26869.8	19352
D.FADDQAESQYNR.I	sll0020	8.03573e-16	2	794.3612	1									36608.9	91064.1	60968.8	39861.2
D.GIVGMAVDETK.L	SLL0533	9.10344e-13	2	704.3926	1									4032.57	2744.87	1743.95	3292.14
D.GQRNLGVDLSPAK.V	XXX_SLL0478	7.33602e-12	3	548.32495	3	21976	19539.9	13636.3	13761.6	20508.1	24041.5	19974.9	10704.2	14475.7	43573.8	10985.8	20389.1
D.IPIVAGSALK.A	sll1099	1.18744e-10	2	628.91095	1					40653.3	63808	74560.3	50726.8
D.KSQLTYDDIVNTGLANVCPEISSFTR.G	sll0427	2.85509e-10	3	1072.8878	1									2122.66	2018.31	2120.43	2343.58
D.LLDEVEQLVEYPTAVLGK.F	slr0220	4.67722e-10	3	768.7639	2					102559	158186	188827	106510
D.PALADTRWKVGAIEREIPIIASAMDGVVDSR.M	SLR1722	9.89083e-14	4	906.9947	2					35568.1	46888.5	49129.7	38504.4	390862	485996	461720	462751
D.PAPATTFAHLDGTTVLSR.G	slr1329	2.75128e-20	3	667.0293	3	56629.8	52385.6	115765	51429.1	31969.9	73522	79007.1	58336.7	42549.1	167011	113642	71953.4
D.PGEPLDVDIYDLSPEELAK.I	slr1756	6.71376e-15	2	1194.6271	1					6192.57	12384.6	15675.4	5824.27
D.PPGPEAGFIDPQTK.E	SLL0408	3.09282e-12	2	871.4705	1					52710.7	77846.7	198082	82782.1
D.PPTQDYSQDYR.S	SLL0497	5.10259e-12	2	757.35583	1					6339.48	11574.5	15341.6	11484.1
D.RLCLVQICDPEGNVTALR.I	SLL0320	6.45444e-11	3	753.0585	1									27360.4	33741.2	0	28838.8
D.SQLEVVGINDTSDPR.T	sll1342	3.98162e-13	2	887.4589	3	12747.7	26926.4	17824.2	26461.6	44039.9	44713	47944.7	48996.4	36209.3	41709.6	69704.1	53829.6
D.STLGLEIIEVVEQAAIASAK.W	slr2094	1.72702e-17	3	777.4569	10	39665.2	5100.57	6005.76	8428.51	12282.6	7363.56	3638.66	6037.72	10024.6	6269.62	4972.2	4082.32
D.TDLLACFR.M	slr0009	1.75139e-10	2	570.3037	3	36633.7	40066	51075.5	39785.1	64620.9	103295	138873	110136	25845.2	45683.9	33192.2	26377.2
D.TPGEQQEINLYSSR.H	slr1295	2.3966e-16	2	883.44574	1									14334.5	18449.6	51688.2	44986.2
D.VTPIEEIGLVGVR.E	slr2067	1.469e-13	2	763.458	1					90825.8	126444	6750.01	86004.9
D.YLQETGRYVPVIADGGIITGGDICK.C	SLR1722	9.75373e-15	3	994.86127	1									23435.8	16123.4	0	0
E.AHAFDTVKGSDYLADQDAVEILTK.E	SLR1233	2.49547e-15	3	1013.53125	1	14005.2	20648.1	21722.8	18916.2
E.ELM*MLLRDRVPPGVDEAAYVK.A	slr0665	8.50767e-15	3	902.49097	1					16195.5	27697.9	19235.6	19830.9
E.EQQGPNTTPNEETASK.T	SLR0476	2.0961e-12	3	673.6686	1					110.81	144.96	159.88	142.68
E.KIAPVVEGLDAFDQMAVDQAMIDRDGTDNK.K	SLR0752	6.7743e-16	4	924.47626	1									5287.18	5235.24	3010.28	2994.42
E.LEKTDEFPDINPERLR.Y	SLR1727	8.58509e-10	2	1131.1075	1	0	0	0	0
E.MDKLM*DDIIR.S	SLL0788	6.42023e-10	3	518.2826	1					18306.3	33910.3	39778.9	65182.5
E.MMPETANIK.L	slr0040	3.23617e-12	2	661.85425	1					92537.9	200783	80731.2	198573
E.NLEYVLPIR.Y	sll1028	1.40068e-10	2	630.8751	1					46133.6	73728.7	73169.8	53970.1
E.SQAPAQVEEADVAIVK.S	SLL1873	3.54342e-19	2	972.0368	1	18293.9	20051.3	2204.3	15854.2
E.SSTGTWTTVWTDNLTDLDRYK.G	slr0009	1.63717e-17	3	916.79755	2	21227.9	8442.01	11396.3	12700.2					18712.8	24405.3	22890	16079.8
E.TLSYLPPLTDQQIAK.Q	slr0012	2.36153e-16	2	988.56903	1	28832.8	31231.9	28747.1	31149.5
E.VYSEVLSYR.T	slr0213	1.31495e-10	2	630.8447	1					55313.4	67724.5	57800.9	85397.2
F.AACGITPGTLMEGVR.F	slr2094	4.72426e-13	2	838.9331	1	84876.7	39311.3	53499.3	46095.4
F.AAGESFTSTFTEPGTYTYYCEPHR.G	sll0199	3.04361e-17	3	972.76794	1					6897.85	10238	8818.49	9074.83
F.AAMLCAGIDGIK.N	slr1756	1.64262e-14	2	754.41486	2	144735	90760.6	183045	69805.1
F.AIGPMDSELTGPVFSQDQK.T	slr8030	9.45454e-14	2	1154.5935	1	8522.03	0	0	0
F.AIPEEFANLPQLK.G	SLL0408	2.43846e-14	2	879.5048	2	67452.9	16547	34474.9	53529.9					26087.9	16192.8	24616.7	17648.3
F.AIQFSPQEETAIAIASEK.L	SLL0023	3.968e-18	2	1111.1013	6	37630.1	23463.4	42280.5	21282.3	23726.3	35669.7	33002	22386	41554.3	30254.1	21748.7	36301.3
F.AIYDAPDQDTVEK.L	SSL2595	1.60108e-16	2	876.949	3	60235.9	44466.5	38119.6	33499.1	51014.5	107218	64735.7	25850.2	92616.5	74920.3	33368.8	48261.6
F.ALVDQWGGDK.A	SLR1908	1.54431e-12	2	688.87805	1					105298	39758.5	56290.4	27342.4
F.ASDLDAATQAQLAR.G	sll1326	6.86049e-15	2	787.9154	3	12794.4	38095.3	46973.6	35307.2	26875.7	69955.7	64350.8	41747.3	30487.3	87873.4	83671.6	70488.3
F.ASGDPIPQNVAR.R	SLL1873	3.33854e-12	2	684.8689	1					92553.5	297834	60905.8	118310
F.AVIGDMTLIPVLEAASQLESEGYGVK.V	SLL0529	3.72677e-17	3	993.5404	5	10833.7	1296	0	2891.19	2697.62	1191.41	399.88	773.64	9648.48	5992.92	1662.69	1764.82
F.AVNTADNTEAIQDATALNWEADGTR.S	sll1694	1.08018e-20	2	1396.1653	5	15542.9	14824.9	21535.1	11800.1	6678.06	19034.1	9798.47	13067.1	0	9722.4	0	0
F.AVYQDASGQAR.D	sll1363	7.26641e-13	2	655.3356	3	4856.87	2226.53	2960.04	3155.5	4496.69	1455.44	2518.6	2446.96
F.DHANLRGADFTGANLQGAR.F	SLL0274	5.06205e-13	3	710.3603	1					8329.68	31561.2	7912.5	6025.52
F.FANYRPQFYVR.T	sll1099	7.45204e-15	3	535.6198	1	286879	86432.1	124482	133719
F.FGGATANEVLAEVR.E	slr0012	6.22725e-17	2	789.425	15	670613	346375	433092	382740	541457	501390	476757	406526	51363.8	43663.9	50870.8	37946.2
F.FGPDLEVTVAEPEEK.V	SLR0575	1.79325e-14	2	974.51483	1					0	4790.74	0	5115.49
F.FLEASQIQQMVER.F	slr0924	3.44361e-13	2	861.95154	2					100256	133375	70969.1	57769.9	84463.1	68433.7	36979.7	40631
F.FVAEVFTGAPGK.Y	slr1329	5.47533e-15	2	755.929	3	86384.6	71124.1	111505	59390.9	71746.7	150512	90826	39947.9
F.GASAPGGVCLEK.F	SLL1070	9.87592e-15	2	717.3873	2					102832	90085.6	155266	71863.8	82856	77069.1	103856	114247
F.GFSVDNVLAK.A	SLL1070	9.37623e-11	2	669.3861	1	61945.1	73794.6	108927	63176.6
F.GFVEMSSDKEEDAAIEALDGAEWMGR.D	ssr1480	1.26554e-16	3	1044.4897	3	9375.07	5018.21	0	8683.45	8675.16	11937.1	0	13245.5	0	8806.83	0	0
F.GGATANEVLAEVR.E	slr0012	1.50001e-15	2	715.88916	3	62072.9	75579.7	65620.9	81274.7	56857	67988.8	72004	67206.5	109227	131249	140393	130528
F.GTVTTQEVADAVEAATNQSLDRR.G	sll1244	8.09759e-10	3	859.4401	1					10855.3	11558.3	10039.8	13591.1
F.KVPFEDIIDR.S	sll1450	2.16579e-12	3	507.29514	4	52701	61277.5	224004	46439.3	11333.6	23757.9	75630.4	8926.32	9389.28	13352.2	27835.5	9321.83
F.LFVQEAIEK.A	slr0009	9.52756e-11	2	682.9041	3	197456	219120	248907	134186	98239.6	154208	255683	109365	123834	102099	86952.4	77667.3
F.LMAVEDVFSITGR.G	sll1099	5.68597e-13	2	791.4267	1					14469.7	9973.29	6640.19	8252.58
F.LSSTELQIAFGR.L	sll1578	6.88596e-14	2	733.4108	1					69150.7	11218.3	12633.7	142108
F.M*DGVSLADLR.L	sll1440	5.53227e-11	2	618.8217	1					53099.8	62702.8	121311	73500
F.MDGVSLADLR.L	sll1440	2.00851e-11	2	610.82544	2	180909	179780	334552	269364
F.NADGGVDYGVAEK.L	slr0550	2.64904e-16	2	791.90076	2					82911.6	63909.4	114373	54672.7	90111.5	81968.5	81481.1	94301.5
F.NTMVGSANAVELTESTRTIPLDEAGGTTTLTAR.Q	sll0258	4.37908e-11	4	880.94385	1					42971.3	90653.1	198986	75290.2
F.SFRNLPDVRGLTSYVPAQTSYIYDAK.G	SLL1434	3.88735e-17	3	1083.5712	1	3022.91	6062.15	8857.2	9072.4
F.SHPADYTPVCTTELGTVAK.L	slr1198	5.75735e-17	2	1168.0947	6	76715.8	69684.5	64554.2	55740.3	48828.4	71782.4	84638.7	44901.6	23130.9	27423.1	30340.8	18581
F.SKQPVAAGDYGDQTDYPR.T	slr1512	1.14986e-18	3	752.7082	1					4937.35	13818.9	6085.29	11547.6
F.SLAIDVIDRLPQLR.V	SLR0453	1.32994e-13	3	585.021	3	23071.7	2549.96	3857.91	6232.66	53947.1	27425.1	6432.64	16854.3	43555.5	14447.1	22084.6	10646.6
F.SLPGAFTPTCSSNHLPR.Y	SLL1621	2.26584e-13	3	662.6732	1					110378	78437.3	86315	57735.8
F.SQFASDLDAATQAQLAR.G	sll1326	7.73141e-18	2	968.9941	3	12166	19139.3	23008.6	20756	13957.9	51399.2	77726.4	39954.6	20482.5	55493.1	63221.7	48957.2
F.SVDNVLAK.A	SLL1070	5.00478e-10	2	567.3392	1					65931.8	52450	79873	43118
F.TINTEESLDTGSGYIAIK.Y	SLR1900	9.78374e-15	2	1100.5833	2	21829.5	19734.1	35755.4	23762.6	19528.2	23417.8	34317.6	16153.8
F.TSDGALQPPFQRPIVGK.E	SLR1963	8.49264e-12	3	700.3993	1					55229.4	47843.5	59559.6	35969.3
F.WGETASGQSTMVK.V	SLL1601	2.19912e-15	2	834.92755	1					10121	26068.5	14064.1	0
F.YLVGDIEEAK.A	slr1329	7.0255e-12	2	712.8961	1					44550.6	119066	147355	68220.7
F.YRFPM*GNLTTWIGGTGLALDDVFK.T	SLR1908	4.37013e-10	3	992.51215	1									4386.21	2405.39	4947.62	4471.63
G.AEAPGVSEPVK.A	SLL1621	7.00854e-14	2	686.38904	1					24551.2	14536.7	32051.3	38786.8
G.ALAQGNAITDPNAILR.Y	SLL0408	1.15343e-16	2	891.50256	10	78538.4	134956	232471	113120	289090	455910	783296	299724	2.42391e+06	4.39982e+06	1.07784e+07	3.70165e+06
G.ASAPGGVCLEK.F	SLL1070	1.07987e-13	2	688.8757	1									76032.2	76837.5	93450.3	66485.3
G.ASVAAGVQK.M	sll1577	2.63895e-11	2	559.84174	4	2479.05	524.54	353.4	8608.94	14857.9	2338.44	1565.73	60554	7617.76	855.5	1013.13	27645
G.DCSAIVAEIAGYFDR.A	sll1577	4.2813e-17	2	915.9477	10	142937	0	595.96	183217	81518.2	5432.15	2545.07	78589.7	128359	0	0	171459
G.DDIPIVAGSALK.A	sll1099	1.54976e-11	2	743.93945	1	35474.8	37875.2	55328	67858.6
G.DVGTVASVEK.S	ssr2831	7.58914e-13	2	646.8671	1					25499.9	32819	39573	44220
G.DVTPIEEIGLVGVR.E	slr2067	7.74016e-13	2	820.97	5	50047.5	69555.4	3356.4	73985.5	26719.4	48884.8	9243.53	30259.9	95621.4	264872	12165.6	101176
G.DYGDQTDYPR.T	slr1512	8.2423e-14	2	687.3073	1					6881.72	20314.9	10101.1	19476.2
G.EEISIVGIK.D	sll1099	2.85319e-10	2	638.39233	1	52097.1	51690.3	62336.2	56201
G.EEISIVGIKDTR.K	sll1099	7.13662e-11	3	549.9883	1									53083	107376	78205.2	70293.1
G.ETCVPIPLVGGQGNSVTK.T	SLL0756	4.11629e-18	2	1072.5839	12	132141	170893	284369	197902	17917.2	14542.8	42574	32591.2	166151	310655	610326	295631
G.ETLGEDYLPLGNTEVTPIITK.I	slr0447	3.66575e-15	2	1296.2075	1	3818.29	0	10335.5	4655.32
G.EYLSGSQLDALSATVAEGNKR.I	sll1577	3.49275e-20	3	833.11005	5	18666	6831.77	6825.26	54811.7	11334.9	10922.8	3256.97	23031.4	7003.25	345.77	2095.45	17319.5
G.FSVDNVLAK.A	SLL1070	2.0523e-11	2	640.87604	3	73990.4	44501.6	64130.4	47511.8	166695	176079	185884	129200	135901	98004.6	183820	113770
G.FTGDLVEVAPGYAR.N	sll1244	2.47356e-13	2	819.9343	1	80803.3	42285.1	61947.3	54476.9
G.FVDLMREDYVEEDR.S	slr0009	5.47063e-16	3	653.97955	1					102170	62773.9	25561.5	47032.4
G.GAAIMNEGENLLYLAR.K	slr0737	4.28025e-18	2	939.99774	2					13000.5	18358.6	14022.9	21326.4	12383.7	10804.9	17729.4	11186.7
G.GAIPETYGVPVEEIQK.G	sll0018	4.69156e-18	2	1009.5571	3	14567.3	12718.4	12441.8	14623.1	17011	12849.2	15431	21152.2	6872.7	9913.81	16631.2	13423
G.GATANEVLAEVR.E	slr0012	2.69608e-14	2	687.3788	2	91236.7	67726.5	66518.5	87123.3					69303	97108.3	100931	82792.6
G.GDATTTTAADAFASK.V	SLL0680	1.08213e-18	2	858.94025	2	26478.8	38430.8	62322	61076.9					23949.3	22512.2	107123	62910.3
G.GDTAQTGGGDATTTTAADAFASK.V	SLL0680	3.00284e-17	2	1202.0786	2	13010.4	13609	12920.8	15513.9
G.GEEVPFFFTVK.N	sll0427	1.59831e-14	2	794.438	3	13571.3	20289	24170.2	17469.3	20314.1	28858.3	36130.3	22098.4	19104.9	28795.1	40445.3	14094.4
G.GGASLELLEGK.V	slr0394	4.58812e-12	2	681.8992	2	35806	61776.3	74333	66196.3					42829.6	68113.4	93228.8	67089.1
G.GGDDVIDAEFSEPEK.-	sll0170	1.20512e-16	2	948.4578	3	20638.5	22647.2	17307.9	33296	10261.1	12182.9	11875.9	6373.08	23334.9	33080.2	36275.2	48923.9
G.GGTLGHPWGNAPGATANR.V	slr0009	6.17356e-14	2	939.47864	1									5862.91	14870.1	12085.4	7090.6
G.GHFQGQLIYDPEVVK.T	slr2094	1.17017e-11	3	673.7036	1					42788.3	48460.9	44477.9	47253.8
G.GILLPDNAK.E	slr2075	4.82611e-10	2	614.87744	2					68121.8	92784.8	132416	90692.4	81880.2	110178	146712	112539
G.GLDFTKDDENINSQPFMR.W	slr0009	1.75196e-16	3	805.7339	5	46008.6	54739.4	77796.8	33609.2	88035.4	72761.9	114143	137127	61427.9	60509.7	76199.3	47010.1
G.GQVISEDAGLKLESATVDSLGSAR.R	slr2076	2.23783e-17	3	897.8183	1					19288.8	20875.3	18168.5	29115.1
G.GSSAGGLTPEVIATVR.G	sll1031	1.90641e-15	2	829.96356	2	33318.3	69614	63495.9	60034.4	40921.5	66484	73242.4	46164.7
G.GTGPLDEYLIAGIDEINR.T	sll1578	3.46559e-19	2	1045.5497	5	47798.5	3083.5	9770.1	44954.7	19895.1	5805.01	3337.52	9487.96
G.GTLGHPWGNAPGATANR.V	slr0009	5.0793e-13	3	607.6468	1									36409.9	32922.8	45683.4	41674.6
G.GTQGIVGTTAANLNR.S	SLR1841	7.51225e-15	2	808.9449	1					21682.9	13738.6	34762.4	15875.1
G.HQGCGAVKAAMDGGDLPGQIGSVIK.K	slr0051	2.1483e-10	3	966.8506	1					0	54716.3	162278	0
G.ITINTAHVEYETDSR.H	sll1099	6.68335e-15	2	946.97675	1	8198.7	7473.81	7173.44	7109.71
G.KGSRNVRSSGQPNTSDIEANIKFEILTETR.E	slr1513	5.64608e-17	4	946.01044	2	103013	69128.6	42362	98325.3	47834.2	104716	19026.6	106697
G.KIFISPVDSVVR.I	ssl0707	3.72947e-11	3	550.00574	1					29376.8	37176.2	36021.8	36696.1
G.LALDEDNQPELTELR.V	sll0248	2.42466e-15	2	950.4931	1									8580.46	5880.5	22361.9	3648.05
G.LDLTPNFEVR.E	SLL1951	1.19463e-11	2	674.37476	4	562569	10297.9	41938.6	203404	1.26122e+06	2612.06	19246.2	795437
G.LYLYKFYEFSRVEPFLDR.Y	XXX_sll1982	4.43197e-10	3	891.8114	1									26449.8	29856.8	32474.3	26827
G.M*YYALQM*AVYTVTNGECIKQTIDTQFMYPRGTTALR.Y	XXX_SLR2117	3.31866e-10	3	1519.08	1	0	0	0	0
G.NAENPM*TAGQTPLLTM*DVWEHAYYLDYQNR.R	slr1516	9.42569e-11	3	1239.5608	1									0	1299.36	2321.26	0
G.NAENPM*TAGQTPLLTMDVWEHAYYLDYQNR.R	slr1516	2.25763e-19	3	1234.2377	2					0	0	0	0	0	0	0	0
G.NDVKVTEFLASHNAGDR.V	sll1316	7.24771e-10	3	721.3756	1									16440.6	28922.8	19383.4	15356.5
G.SALVIDDSSTER.S	sll0039	2.79909e-10	2	718.87067	1									8098.95	13593.9	20297.6	11737.8
G.SDSGALVFEPSTVTIK.A	sll0199	4.69894e-17	2	970.03345	6	28294.9	52011.9	35587.7	35043.3	29747.4	77009.6	63934	46576.7	3093.69	13171.9	9182.11	5338.38
G.SEYTVEFLQK.L	ssl0707	5.49654e-13	2	766.4153	2	21729.4	25482.8	40127.1	30605.7	17783.6	31726	46076.6	35314.5
G.SGQGIRNAANIGIIIENAK.V	slr0633	3.74526e-10	3	743.4342	1					5409.9	6635.55	9574.42	5090.51
G.SITSIQAVYVPADDLTDPAPATTFAHLDGTTVLSR.G	slr1329	1.63672e-16	3	1263.3236	3	1980.95	0	0	0	0	0	0	1679.7	0	0	0	0
G.SLETGQGEAEDGHGFEGK.L	sll0018	2.1746e-18	3	712.6745	1					30394.8	29069.2	31152.3	16647.8
G.SPQIINDGITIAK.E	slr2076	8.07336e-15	2	829.48956	3	84154.3	107974	79620.1	96529.3					12895.9	17859.2	15139.6	16319.3
G.SQLDALSATVAEGNKR.I	sll1577	8.82723e-16	2	974.5377	4	88075.5	5835.45	13071.3	303284	36487.4	12809.2	56405.1	102307	31862.6	6141.9	3144.19	79629.8
G.STGEIAGIFESEQPSDTDLGAKEPLDVK.V	sll0427	2.03472e-13	3	1122.5819	1	2974.16	5951.48	6937.36	7266.39
G.STYTQEMGLK.S	SLL0359	2.03901e-13	2	723.3799	1									81367.6	156380	163859	134018
G.TGPLDEYLIAGIDEINR.T	sll1578	2.70417e-17	2	1017.0393	3	83889.5	11525.4	14120.9	116918	17107.2	1583.99	2853.58	21138.4
G.TVVGKLEGER.G	slr0009	9.32501e-10	3	459.27536	1					117798	182219	152972	257264
G.TVYVM*ERNEGQSGEIK.V	SLL1892	1.36031e-12	3	715.3678	3	4219.45	7129.44	5182.29	7551.91	14228.9	31698.7	41641.6	63948.7	20368.9	70279.2	123123	53001.6
G.TVYVMERNEGQSGEIK.V	SLL1892	1.23395e-12	3	710.0348	3	11134.7	42274.1	27151.6	41768.6	79916.4	163895	188949	230954	12858.9	43141.5	55588	28707.6
G.VEM*FQKTLEEGM*AGDNVGLLLR.G	sll1099	3.13447e-15	3	924.4902	3	59449.9	49343.3	71286.5	41047.3	8679.67	12994.6	14013.8	11750.3	6027.28	9537.5	12330.1	9280.54
G.VM*FDDVAGIDEAKEELQEVVTFLK.Q	slr0228	6.5908e-12	3	1058.2241	1									696.3	540.03	0	0
G.VNIFYTAPTAIR.A	SLL0542	8.88261e-11	2	755.4324	1					86380.6	16373	34990.9	19740.1
G.VPGASVAAGVQK.M	sll1577	1.23354e-13	2	686.4132	3	21588.3	7881.15	9515.48	37219.8	94484.4	75673.1	81214.2	212999	29007.5	27872.7	29183.7	51119.4
G.VVSGDVTPIEEIGLVGVR.E	slr2067	6.99834e-19	2	992.0666	5	366791	90313	0	79996.8	100049	29103.2	2815.97	29442.4	122336	73573.5	4165.04	34104.1
G.YDFDESKAVKNGKFVGLALDEDNQPELTELR.V	sll0248	3.81465e-15	4	1030.2943	1									0	323.63	0	0
G.YFPVAPTDTAQDIR.T	slr1756	8.99427e-14	2	869.44885	3	48311.6	55796.8	85059.8	38958.8	24938.6	38610	58936	21661.8	29843.9	51998.4	50622.5	27131.2
G.YIPIVEAAPLIIAQEK.G	slr0040	2.58462e-15	3	686.08264	4	50742.5	24416.2	20006.6	39311.1	12480.2	13918.4	8084.54	16975.3	5878.82	5331.66	2953.05	3033.53
G.YQPTLGTDVGDLQER.I	slr1329	2.50004e-17	2	918.46466	3	44676.2	150358	87479.5	69977.6	48379.2	138021	148599	84788.4	105105	366606	438169	183354
H.DFDSQTSDLEDVSR.K	slr1834	1.02428e-17	2	879.40027	1	30322.1	24246	36833.6	30246.2
H.ENLEYVLPIR.Y	sll1028	8.45061e-12	2	695.3966	2	164370	60339.2	97957.6	100212	60081.3	48094.5	42996.2	41935.7
H.GGPASQTVVTESVLPLADLGTLPLKEFALEDK.Q	SLL0529	8.36879e-16	3	1243.3654	2					1022.79	1092.28	0	1241.02	2066.97	2293.19	0	1202.46
H.GIAQVPSGASTGSFEAHELR.D	SLR0752	1.35642e-21	3	720.0382	1	30637.8	38464.4	40213.8	39531.9
H.GLNETDFLTTLTEFTAR.S	SLR1179	9.25486e-20	2	1037.0358	1					7753.64	2679.01	6639.72	5080.63
H.IGGLDLLPTPK.G	SLR0476	4.74139e-11	2	706.4414	2					97944.4	54217.2	96245.1	72314.5	15725.9	22778.2	31237.1	19592.2
H.ILALDEQVQLAEALVAAGADIIQTEGGTSAEPHHPGVLGLIEK.A	slr2032	3.57859e-16	4	1166.1395	1	880.48	0	0	0
H.INIIDTPGHVDFTIEVER.S	sll1098	3.88226e-19	3	738.0631	1	44511.4	2488.71	8562.81	7761.18
H.IVQAELDQK.L	SSR1528	1.31064e-10	2	666.3931	1					195888	291091	434120	299628
H.LSTPISDSAFTR.T	slr1655	6.00135e-10	2	719.8855	1					112071	119384	168410	126945
H.NIVFAADGVDADTAAK.L	sll0199	3.72867e-19	2	933.49445	6	188780	172712	166717	85268.8	103594	182065	118717	54160.2	93271.3	129948	163922	90872.7
H.PADGVFPEKVNEGR.E	slr0737	5.18338e-12	3	601.65826	1									108372	263039	124868	157768
H.PADYTPVCTTELGTVAK.L	slr1198	1.20231e-21	2	1056.0491	3	18685.9	33366.2	37253.5	34409.3	10095.9	35953.7	32531.9	23292.6	5201.23	20055	15976.3	10954.1
H.PKQFRAIGVVYGR.Y	SLR1122	1.21264e-10	3	593.68805	1	4084.74	0	1332.93	0
H.PSAVM*DMSFANQALACEHLVK.N	SLL1234	4.3403e-11	3	875.4352	1	2468.67	2771.24	3542.4	3509.96
H.PWGNAPGATANR.V	slr0009	8.07149e-12	2	678.3487	1					63989.9	155054	141977	114050
H.QTGNLAGDSANQLR.A	sll1031	3.40629e-12	2	794.91095	1					19336.9	34767	43143.4	25764.4
H.RLDEIAEFFR.S	slr1622	1.46115e-11	3	480.59808	1									4934.05	0	1660.99	0
H.SFDEMPQVIQTLR.E	slr2073	3.06555e-13	2	854.4477	1					26668.4	36288.9	26041.4	28956.6
H.SGTVVGKLEGER.G	slr0009	2.31932e-11	3	507.29413	3					195478	367019	329901	434875	30425.3	89652.1	99684.4	59186.9
H.SIPVEVDQEIAR.L	SLL1234	7.38776e-12	2	750.41376	2	290571	176584	176531	189307	108834	56363.8	77658.1	95180.7
H.SKGEVLDLNEEYALVR.F	SSL1690	3.65858e-15	3	708.3906	2	13399	32668.2	63026.6	25486.2	19599.8	43591.4	89085.3	34253.6
H.SLADPDELR.S	SLR1934	3.36381e-10	2	580.3076	1					173955	114377	173277	108862
H.TEFEGEVYVLK.K	sll1099	1.91137e-12	2	801.936	1	50820	41658.3	71501.2	54894.6
H.TYEDILASINAR.K	sll1525	2.3844e-14	2	755.4063	4	60717.2	66128.9	72693.3	71484.3	43391.3	49997.3	69460.1	68904.2	44506.4	66789.8	50908.3	40067.8
H.YAHVDCPGHADYVK.N	sll1099	4.8109e-20	3	640.64746	5					186996	495938	283483	316472
H.YLNVTAGTCEEMMK.R	slr0009	3.63366e-14	2	967.9671	1					23196.8	16748.6	22760	15147.6
I.AETLTGSR.E	slr2067	7.97683e-10	2	489.7698	1	824.86	1167.66	546.69	621.5
I.GDRVETSGQGGWDDNLQIPELLADEIAQAFQNIER.T	SLR0318	8.91689e-15	3	1343.9885	1					0	0	0	0
I.IDESGAKGYTVM*NTGGK.G	slr1513	9.62147e-11	3	725.706	1									17594	36327.6	23976.3	45690.9
I.LEREQQILQGAELEAQR.M	SLR0848	7.51426e-10	3	718.72864	1	6475.07	1663.18	0	2952.2
I.LSWQAPTILNPHLATGFKDAEASR.I	SLR1740	3.01587e-18	4	728.8914	1					12928.1	12422.1	13440.3	10412.8
I.M*EVVAEGEK.V	SLL1712	1.49805e-10	2	647.84247	1									2658.96	3859.35	2390.43	2903.98
I.M*KESAVYQEILEEGK.I	SLL1774	1.02451e-12	3	734.72797	3	104786	142177	143174	163890
I.M*KESAVYQEILQEGEQR.G	SLL1201	4.05608e-14	3	781.401	1					10056.1	15508.7	13254	13317.2
I.MEMEGLPDLKVEQAFELTDATAER.S	slr0665	1.67198e-14	3	1004.82776	1					1785.7	3399.06	3870.84	2428.49
I.MKESAVYQEILEEGK.I	SLL1774	4.42758e-16	2	1093.5885	6					300704	709629	456915	397675	77712.6	169113	80834.5	146873
I.MKESAVYQEILQEGEQR.G	SLL1201	1.14963e-15	3	776.403	2					0	12467.2	0	16534.1	8288.54	13919.5	8910.02	9677.19
I.MKESAVYQEILR.E	SLR1712	4.34137e-13	3	585.66223	5	117840	178497	208931	257616	51243.1	129754	72990.2	111785	8376.49	15405.7	20989.5	11960.1
I.MRDVFIVAAK.R	slr1993	4.94975e-10	3	479.95346	1									48874	55865.7	62706.9	33319.6
I.QVADDTFYNADNLLETALPER.L	XXX_slr0963	6.68727e-10	2	1270.1212	1	0	0	0	0
I.TAVINSADVQGK.Y	slr1986	2.01337e-11	2	746.43304	1					49352.9	97711	40413.3	45116.9
I.TVLLPGGEEVPFFFTVK.N	sll0427	2.35035e-15	3	723.4126	1	4236.7	9926.83	3660.4	5090.84
K.AAAAELAIPLYR.Y	SLR0752	9.92007e-15	2	701.9111	21	5.15553e+06	3.19507e+06	2.87214e+06	3.13681e+06	3.72137e+06	3.20766e+06	1.97278e+06	2.154e+06	8.34466e+06	5.7097e+06	3.48976e+06	5.78034e+06
K.AAAALEEADIEFISQSLELAPAQVR.K	SLR0039	2.26965e-26	4	697.37366	44	24244.6	4134.32	2490.04	2945.01	38148.8	15180.7	8359.08	21214.9	75414.6	40941.4	39036.9	31783.5
K.AAADFLLDK.N	SLR2100	7.63102e-12	2	626.36194	2					42394.8	53328.4	60966.5	42092.8	187612	127980	82791.8	197324
K.AAADFLLDKNAFLEQEVAR.R	SLR2100	1.55749e-20	3	803.77466	9	80717.1	102613	71691.7	176002	55262.2	57974.5	39367.7	65190.1	188085	304464	177285	342669
K.AAAEAEINDPEGDSPEEDFTGDTELGLK.A	SLL0602	3.96309e-20	3	1070.1669	5	0	0	0	0	0	7747.52	2370.69	5080.96	0	0	0	0
K.AAAEALKPAAK.H	slr0186	3.38284e-14	3	491.64297	3	2879.31	4775.43	3880.34	6741.16	10480.3	14743.2	14644.1	22421.3	36108.9	39994.9	42205.4	62868.4
K.AAAFFEEAPGVMAK.A	SLR1125	6.96377e-16	2	863.9571	1	11570.3	17116.4	12703.7	12564.4
K.AAALNGWIDEQKVTLETLTSFK.R	sll1994	7.95153e-21	3	956.8652	3	32272.1	6322.25	12477	11492	56331.4	29185.8	11278	31304.7	13146.3	5104.72	4048.12	3035.14
K.AAALNGWIDEQKVTLETLTSFKR.A	sll1994	1.18003e-15	4	756.9263	2	96889.2	23714	17318.8	54059.2
K.AAALVLPQLK.G	slr0884	2.44704e-12	2	656.4318	9	16922.7	25629.9	22903.5	34037.2	392194	1.06513e+06	703197	964687	141829	402112	242340	623346
K.AAAPVETPASAPVAPAPK.A	SLL1873	3.44298e-23	2	967.0516	11	24974.3	170137	10599.6	76629.3	461943	4.10269e+06	225073	1.30013e+06	359977	1099184	9693.21	602916
K.AAAPVETPASAPVAPAPKA.K	SLL1873	1.04645e-12	2	1002.5709	1	6000.25	14592	4078.88	7742.8
K.AAAQGSHILYTDVWASM*GQEDLADSR.I	sll0902	7.4246e-23	3	984.80115	11	42178.4	38831.2	51120.8	37691.5	15352.4	55180.4	17073	10866.9	37849.4	41164.7	7688.47	30245.2
K.AAAQGSHILYTDVWASMGQEDLADSR.I	sll0902	5.91623e-27	3	979.47	7	20737.1	11695	29587.8	32745.8	32543.3	37801.4	41513.6	34176.4	9210.69	6751.6	7970.26	6135.67
K.AAASILELQK.A	SLR1349	2.62633e-12	2	666.4096	9	249546	294115	434590	316521	876409	1.21571e+06	1.69406e+06	1.01541e+06	376018	324448	795721	427343
K.AAATSTNTSTASEGFQPDPR.W	SLR0193	3.70935e-24	2	1077.0123	41	47463.8	77652.4	51530.5	46597.6	53198.8	170177	142562	127465	264336	126768	353512	145366
K.AAAVVSAQESVR.V	SLL1481	7.92128e-16	2	666.3737	5	18846.8	21190.7	19965.6	17191.2	780231	981174	863100	777375	494416	718284	648219	418341
K.AACEIVVASYR.D	slr0984	2.34853e-15	2	691.8631	3	83338.2	76815.7	141547	125742	73047.2	93730.5	175703	119064	124514	168101	305703	198165
K.AADANVNYQK.S	SLL1863	2.17095e-14	2	691.3703	11	10236.4	30255.3	13822.1	20620.9	3018	5706.17	7577.56	9157.85	9265.23	14575.4	20448	33795.8
K.AADGSDVELWK.L	SLL0480	3.4677e-15	2	739.8893	5	409675	489085	370257	572055	1.33679e+06	1.07963e+06	1.19274e+06	1.21224e+06
K.AADGSDVELWKLWNR.R	SLL0480	2.61128e-19	3	683.36597	1									27360.8	31903.3	43206.9	31389.7
K.AADGSDVELWKLWNRR.Q	SLL0480	5.04643e-13	4	551.801	2					24379	29238	184.76	70317.4	19790.9	17796.7	12588	11811.6
K.AADILEQR.R	SLR0370	1.79286e-10	2	530.2986	1					103858	71719.1	125539	61491.8
K.AADLIM*ILLPDEVQK.T	sll1363	2.82256e-18	2	987.0653	24	273725	36207.8	90191.2	86519.7	356504	153869	163885	154358	182139	98256.6	86717.2	85885.5
K.AADLIMILLPDEVQK.T	sll1363	1.31767e-17	2	979.07007	16	168125	9672.04	36076.8	36217.7	337089	65139.7	56656.7	65314.3	62149.9	17340.6	17719.8	16975.2
K.AADWLTLPHLR.Q	SLL1253	1.01269e-13	3	479.60858	1					10265	19015.2	18340.9	15097.9
K.AADWQER.E	slr1281	8.90029e-11	2	510.2552	1	17149.5	16840	17489.5	8880.2
K.AADWQERECYDMFGIVYEGHPNLK.R	slr1281	8.7535e-17	4	804.8845	2					32053.8	15590.7	6865.5	13936	16090	7047.47	5796.49	3074.28
K.AADWQERECYDMFGIVYEGHPNLKR.I	slr1281	4.40849e-16	4	843.91095	3	141696	34210.5	9270.79	51861.1	45079.4	12304.6	8654.54	13214.9
K.AADYIKGFNK.T	slr0040	3.89997e-14	2	779.9496	1					20510.9	26759.1	31315.3	83959.1
K.AAEAEQASALSEM*TVR.E	sll1536	1.97631e-18	2	912.4497	20	89081.2	112548	69923	142520	107744	485000	405552	470416	627607	1.88404e+06	1.48111e+06	2.33294e+06
K.AAEAEQASALSEMTVR.E	sll1536	1.08893e-20	2	904.4523	15	2.25352e+06	4.92458e+06	3.52789e+06	5.72149e+06	168465	507509	513326	592416	127108	398061	530339	356017
K.AAEDDRIVALLIDGR.R	SLL1703	2.21288e-14	3	591.0003	1					13784.5	12814.9	5607.31	9164.09
K.AAEELFLTQPTVSQQMK.Q	sll0030	2.51527e-21	2	1105.092	6	0	19819.4	18055.9	21108.3	9816.56	22836.7	32793.9	21832.8	12665.3	17247.3	15395.9	14793.8
K.AAEESRDEIAR.S	sll1633	4.24766e-12	3	464.2399	5	1491.65	2319	1692.84	1958.63	1966.8	1985.47	4933.8	5489.86	451.63	971.47	2866.03	2556.16
K.AAEFLKDVPINLGISSPM*ARPK.E	SLR1124	3.56124e-17	4	701.4037	2					19058.2	34067.8	18056.2	50572.1	6927.13	19445.5	24523.2	14632.9
K.AAEGFIYIWGLPTK.V	slr0585	2.62772e-18	2	927.5278	7	121828	20504.9	22457.5	41886.8	14780	4726.22	0	0	40364.7	8104.64	8298.67	9925.44
K.AAEGQILR.T	sll1463	7.79528e-10	2	501.29596	1	8550.55	20068.6	16814.5	12486.9
K.AAEHASNFMYNR.Q	SLL0735	1.47982e-16	2	777.86444	2					142890	209163	163073	189923
K.AAELFNAQEK.K	sll1667	3.55281e-13	2	704.88617	3					835843	1.53669e+06	1.16257e+06	1.22283e+06	335231	489144	375780	578127
K.AAELFNAQEKK.D	sll1667	6.22826e-15	2	840.9851	4					109999	169970	169360	244352	662464	1.17543e+06	1.23032e+06	2.01063e+06
K.AAELKPIPFSQPTSEK.I	SLR0575	7.90284e-21	3	726.0829	7	757929	533379	645064	430313	204674	211991	260727	120172
K.AAELQYGK.L	SLR1641	3.69077e-11	2	584.3332	1	11920.1	17276.3	7965.65	16037.4
K.AAEQEFADLQK.F	SLR0659	9.79419e-15	2	769.4074	6					438648	731458	908551	599014	65327.8	100968	109300	128641
K.AAEQLASLK.V	SLR0929	1.48606e-11	2	609.8672	3					211014	443719	797488	233658	146168	304541	176827	296340
K.AAEQLASLKVNYK.I	SLR0929	6.18937e-17	3	623.03815	2					388872	593998	873422	887972
K.AAESINLCGGR.N	SLR0106	6.12157e-11	2	646.83075	1					20386.5	22112.8	38679.2	21610.3
K.AAETALSLPESYIEVVR.K	SLL0006	4.19651e-16	2	996.5442	3	40211.8	15047.7	21536.2	21987.5	68009.3	31425.8	35090.1	19502.2	6851.01	4213.6	5539.87	2433.66
K.AAEVATELGYETVTGLPHNQK.F	SLL0157	4.17509e-27	3	839.44556	16	225729	201749	203924	185206	46897.1	41366	44281.7	54499.9	216656	218300	111238	128591
K.AAEVEIPQAVLPDTVFEAVVK.I	sll1317	6.26098e-24	2	1257.211	32	111438	66348.8	66410.1	50787.9	75959.5	140638	67003.6	22479.3	192493	144516	75556	94857.1
K.AAEVEIPQAVLPDTVFEAVVKIPYDLDSQQVLGDGSK.G	sll1317	2.97508e-20	3	1458.4608	8	0	0	1960.51	0	2120.98	1930.67	0	7215.28	2064.16	916.91	1880.64	1415.2
K.AAFNADCDGQAGLQELAGNATLLYYMTEEGSEGK.Q	sll1127	1.51438e-21	4	971.4568	2	14476.1	0	8142.58	0	0	0	4581.21	0
K.AAFPAWK.K	sll1561	9.57876e-11	2	539.817	2					134504	291831	293450	240795	134760	209124	170287	217583
K.AAFSETYHHLGSHGQDVR.C	SLL0596	1.84682e-23	4	539.7651	8	14270.6	15539.5	11072.5	9065.64	82695.4	112538	74277.8	63617.5	238995	311973	148726	111369
K.AAGAFAALK.E	SLR1853	8.67393e-12	2	554.33813	3					114082	145469	10281.9	62685.9	423945	276924	48552.6	249022
K.AAGDLEAHSVDEDFLTALEYGM*PPTGGLGIGIDR.L	slr1550	5.77528e-12	3	1216.5953	1					0	0	0	0
K.AAGDLEAHSVDEDFLTALEYGMPPTGGLGIGIDR.L	slr1550	2.72828e-14	3	1211.6	2					0	3537.45	2388.15	0	0	0	0	0
K.AAGELLSQPQAYEQMANAINPFGDGTASQK.I	SLR0624	1.22235e-13	4	849.6765	2	6391.11	4892.49	5655.08	4402.05	5697.18	5873.91	7008.14	6961.75
K.AAGFTIVGK.T	SLL0828	3.92032e-12	2	576.3548	2					537928	655297	1.25972e+06	765668	173359	290637	317335	255690
K.AAGITAGLKPSGSPDLSLIYSETEAIAAGVFTTSQVR.A	sll1883	1.98504e-17	4	992.5386	3	1728.68	0	0	2076.37	2989.68	1737.63	0	0	2540.39	957.91	1195.17	709.24
K.AAGREDLAQR.A	SLL0162	4.19358e-10	3	410.8946	2					806.83	937.18	630.45	821.09	529.99	951.99	1757.47	1560.83
K.AAGTLADLDSAEQLAAIVR.A	slr1656	2.15979e-22	2	1015.0563	8	41186.9	81828.4	69332.1	77105.1	24138.9	77919	78859.2	27650.1	23145.1	60688.7	50801.1	45190.7
K.AAGVLSDAPR.D	slr0611	7.53339e-11	2	550.812	1									39393.5	62068	58739.1	49012
K.AAGVPLIVAINK.V	slr0744	1.74212e-14	2	727.4714	2	84429.4	53785.4	62292.5	48629					29128.3	36981.5	32637.9	28244.6
K.AAGVPLIVAINKVDKPEANPDR.I	slr0744	1.14161e-23	3	907.19916	5	9746.89	13500.9	19898.2	10559.8	114999	164745	105321	80618.4	93333.2	99368.4	56543.1	75428.7
K.AAGVTALDPR.A	sll1525	6.57662e-13	2	557.81903	3					1.5817e+06	4.30625e+06	2.04276e+06	2.39068e+06	865984	1.74017e+06	2.01015e+06	2252136
K.AAHSAFNLAGTK.T	SLR0657	4.50403e-12	3	492.6113	1	19712.3	33006.8	20543.3	37987.1
K.AAHTFPNVNQDFWIR.Y	slr0040	3.34673e-21	2	980.50073	48	2.54544e+06	2.64304e+06	814579	3.06149e+06	1.19685e+06	2.03105e+06	621572	1.54539e+06	936524	1.21256e+06	419553	1.05071e+06
K.AAIADPNRFAAYLVTSTDSLAQK.A	SLR1794	1.68131e-17	3	904.4923	6	19135.1	20987.1	27218.3	29177.6					19077.4	30132.2	24954.5	17562.1
K.AAIAGCTVVINAAGAR.P	sll1218	5.44026e-16	2	829.9601	2	79810.5	40893.2	82364.2	31308					42944.4	42606.9	49623.3	38323.2
K.AAIAGCTVVINAAGARPSADLTGPFK.V	sll1218	7.39487e-18	3	939.51514	2	16029.5	10078.8	17231	10439.5	23158.6	32192.5	24755	17297.7
K.AAIEEGDNWIR.R	slr5017	9.15467e-15	2	709.3623	3	117373	151214	164525	179196	79770.5	99370.9	143935	101979	157534	227901	230338	284158
K.AAIELLFDVK.V	sll1801	1.28664e-12	2	703.93134	20	926688	383024	384779	444161	736980	728060	315410	385939	1.43493e+06	532009	696972	458480
K.AAIEQIFQQHGVVTDPEAIDTLVR.Y	slr0963	4.67431e-22	3	931.8341	19	276084	318885	282479	303082	286607	816438	342761	417354	628312	930885	349133	583597
K.AAIFVVDGQQGPTASDEEIAQWLR.Q	SLR1974	3.75964e-21	2	1373.2042	7	4452.07	0	0	2249.02	23627.5	16534.5	2317.06	2176.85	32943.9	15045.5	10954.2	21049.5
K.AAIISIDKAYPGQAK.R	SLL0936	8.89661e-17	2	989.5873	3					16150.2	41515.8	41101.1	34857.4	160708	335908	215927	322148
K.AAIIWEGEPGDSR.I	SLL0542	1.28231e-14	2	772.89453	4	40828.5	84309.4	49628.1	46302.9	159052	343716	155725	118882	284689	511429	143938	249748
K.AAILNAEAEQQK.K	SLR1128	2.92068e-15	2	787.44226	7	16880.5	27978.6	69845.1	41120.2	140903	279245	830775	318048	114284	210154	565838	319381
K.AAILNAEAEQQKK.V	SLR1128	1.33633e-16	2	923.5393	9	10782.2	19060.8	39926.3	25143.2	120545	309629	627283	433247	2.7158e+06	6.89869e+06	1.52766e+07	9.37517e+06
K.AAINGEIHYYDSINLFDDQGK.L	SLL1640	4.99956e-13	3	891.44135	1					13651.3	17671.2	14340.8	15061.2
K.AAKANAELQQTLGGLGTSSATSAFER.M	sll0617	7.08185e-20	3	956.50696	1									5497.93	6284.31	8815.57	4127.57
K.AALDGGIEVNVPFLPGR.G	sll1987	2.68961e-18	2	935.02246	3	113007	47077.4	172266	71690.4	10863.6	5143.13	6954.59	9381.55
K.AALDGGIEVNVPFLPGRGDATQAM*TDAESFTPLEPIHDGYR.N	sll1987	1.67638e-14	4	1122.8037	6	0	0	0	0	0	0	0	0	5579.79	0	2867.47	0
K.AALDGGIEVNVPFLPGRGDATQAMTDAESFTPLEPIHDGYR.N	sll1987	6.36435e-14	4	1118.8055	5					0	6679.07	0	0	2965.12	3235.77	1835.36	0
K.AALDVFEQEPLAADSPLTQLPQVILGSHNGSNTR.E	SLR2123	1.4129e-13	3	1245.3148	7	5019.39	0	67629.4	3047.36	0	0	0	0	0	0	6753.79	1263.25
K.AALEKEIEKLER.R	SLR0731	1.13067e-14	3	621.03906	6	285592	474491	149452	307097	132002	333955	100372	315366	519253	1.33164e+06	182839	409281
K.AALGLTKDEAEK.V	SLR0374	2.44266e-15	3	559.995	4					3.14322e+06	7.80556e+06	7.33682e+06	4.32181e+06	1.55958e+06	2.2399e+06	2.0118e+06	2.5361e+06
K.AALGLTKDEAEKVYR.K	SLR0374	2.76978e-18	2	1048.6075	6	93273.5	475883	248882	481963	33396.7	61510.9	102005	106712	95946.1	231268	397770	287496
K.AALHLSAEAVR.L	SLL0891	3.28881e-14	3	427.91766	6	119792	110279	103971	122905	165735	208338	170689	176695	32460.3	49340.3	32112	40944.8
K.AALIQLLGQK.-	SLR1183	6.95732e-12	2	671.93665	3					24187.8	44692.3	76772.6	64712.3	18617.1	34114.7	68438	49395.4
K.AALNAIEQVFAEK.G	slr0212	3.26689e-14	3	564.65796	3	17521.5	5891.03	7015.47	7684.45	18348.1	11931	8245.63	0	9754.91	8143.61	4695.65	5756.24
K.AAM*ALGDNCAQALR.S	SLR0237	1.45574e-16	2	811.3976	3					20232	45254.2	71005.4	45073.9	56315.6	77419.8	149122	117155
K.AAM*DGGDLPGQIGSVIK.K	slr0051	7.55263e-21	2	967.0171	13	244938	472656	777517	264072	33663.2	74304.3	248273	44546.6	28473.1	43679.5	96171.1	37288.4
K.AAM*DGGDLPGQIGSVIKK.I	slr0051	7.53518e-19	3	735.74646	4	47267.8	40898.8	67455.5	41637	93144.8	168143	124343	76857.3	101028	289447	255583	122211
K.AAM*EFLLR.S	sll1393	7.96086e-11	2	555.80865	1					119556	127162	110652	59699.1
K.AAM*EQGLLLAPAGPK.V	slr1022	3.08316e-18	2	886.0042	3					65274.6	95028.4	129839	96024.3	10112	17059.4	12602.2	13445.1
K.AAMAILNPR.M	slr2005	3.59946e-12	2	550.82166	1					561631	612623	2222845	574098
K.AAMDGGDLPGQIGSVIK.K	slr0051	2.50015e-21	2	959.02075	13	469964	1.04314e+06	2.16976e+06	411793	133769	210134	616395	104900	80477.8	168286	343394	133538
K.AAMDGGDLPGQIGSVIKK.I	slr0051	9.98281e-22	2	1095.1176	4					97804.1	215839	453191	192468	27919.4	59156.7	112577	73805.2
K.AAMEFLLR.S	sll1393	5.08744e-11	2	547.8121	5	371714	101538	298398	109623	108872	62230.1	81950.7	30265.2	331857	202910	115112	118599
K.AAMEQGLLLAPAGPK.V	slr1022	1.02062e-18	2	878.0087	6	237556	303489	304083	219483	114441	145091	102026	62554.3	44496.2	60365	85888.8	55131.2
K.AANGAILQEIGNVSHDKVTM*GEIPPLVEQAFVASEDSR.F	SLL0002	1.18313e-15	4	1075.3044	4	5806.15	7035.75	4365.69	0	2369.26	3789.22	3763.98	0	4736.97	4987.64	3574.48	0
K.AANGAILQEIGNVSHDKVTMGEIPPLVEQAFVASEDSR.F	SLL0002	7.50603e-16	4	1071.3042	5	13927.7	0	0	13809.4	9871.82	4290.26	0	9828.48	5171.93	0	0	0
K.AAPATAEIPIIFLSALTDQK.S	SLR1305	1.79351e-23	2	1179.6804	10	11079.1	20313.6	2277.33	21331.5	15250.1	24386.8	3588.86	20332.2	17531.9	19616.6	6044.12	14179.3
K.AAPDSINNKEELEVK.V	SLR0697	1.45802e-19	3	697.0539	4	222602	204100	93621.5	130125	34919	52476.8	29091.1	34171.6
K.AAPGYFTAK.L	SLL1356	5.74483e-13	2	607.3428	1					682457	667288	411662	365531
K.AAPTLAAAHAISR.A	slr2032	1.58601e-16	3	465.27255	15	50502.3	77847.4	39669.5	63856.8	3.72475e+06	6.08281e+06	3.79362e+06	6.12041e+06	2.88326e+06	5.03127e+06	3.31465e+06	4.21029e+06
K.AAQFLETLSR.Q	slr5058	4.58215e-13	2	640.35944	2					76776.6	149871	167351	78414.2	36274.3	53370.9	31017.9	35045.7
K.AAQIASSPR.T	ssl0563	4.82577e-12	2	522.7999	6	3941.24	5992.12	8277.2	7065.46	1930.53	2735.12	8970.16	6347.14	5214.25	5124.39	15687.1	14036.3
K.AAQIASSPRTEDCVGCK.R	ssl0563	1.68638e-13	3	713.3573	1					4066.64	9559.76	11126.2	17700.4
K.AAQIYSAIQTGAK.L	slr0161	1.33525e-16	2	805.4607	5	87655.3	132960	162104	128756	49079.8	149552	142296	96644.7	82341.5	149571	99130.6	112711
K.AAQSAIAACR.Q	sll1307	1.16003e-13	2	581.81006	2					9987.4	8032.35	6257.78	7573.95	6457.56	5844.76	3225.46	8118.26
K.AAQSYWGGAQQVGVTVK.G	SLR1794	6.77197e-23	2	1019.5499	3	19719.3	30366.6	25556.7	24613.1	9637.05	31108.8	32408.4	27702.4	19605.4	33181.8	30769.3	31606
K.AATDQAQNAAEAGITK.I	SLR0226	2.10256e-20	2	924.48785	5	8672.93	10238.6	11930.3	11474.7	7383.25	43776.3	49887.1	27834	7865.54	41561.2	60560.3	23981.1
K.AATKDQDNTEVESVTGAVK.R	SLR0962	3.31994e-18	2	1198.1359	5	26160.2	33147.6	27826.9	21360.8	18234.5	42456.3	28221.1	35667
K.AATKDQDNTEVESVTGAVKR.D	SLR0962	5.89585e-22	4	638.59705	6	52553.1	133016	59667.4	77879	101131	212201	237443	200958
K.AATLDTEAAQGFANSPDAVAAILYADTGSVLVQSAYR.Q	slr0559	1.83695e-30	4	968.744	57	37031.1	611.77	3183.3	10970	53806.7	17884.9	2953.56	22514.9	54857.2	54366.6	25046.4	24127
K.AAVAELGVNPQGFR.V	SLR0804	2.79989e-15	2	786.9342	2	62111.6	220254	51662.6	130126	42998.1	84303.1	55096.9	67790.9
K.AAVAELTDYQPMYVVGEEGVVEVAR.Y	SLL0019	6.27177e-13	2	1420.2222	1	0	0	0	5285.32
K.AAVAFLEPHMDKDDSADNAK.G	slr0212	1.71514e-19	3	859.77185	3					80232.7	129996	39137.2	51156.4	150905	174691	57401.6	120068
K.AAVEAAGDVGETPEGLEK.V	slr0447	1.18028e-22	2	1016.027	57	245535	4.10459e+06	1.22784e+07	2.76394e+06	1.25749e+06	3.09529e+06	1.11122e+07	1.6388e+06	850145	1.78994e+06	9.25444e+06	2.8808e+06
K.AAVEAAGDVGETPEGLEKVR.A	slr0447	5.95758e-21	3	762.74316	16	165956	315547	178152	306761	33187.1	212175	3.59723e+06	2.4635e+06	53799.1	51866.3	1.09504e+07	824236
K.AAVEEGIVPGGGTTLAHLAPQLEDWATGNLKDEELTGALIVAR.A	slr2076	5.22956e-24	5	934.9062	15	575936	0	6564.67	0	17842.1	2178.12	0	0	9306.65	0	2302.85	0
K.AAVEEGIVPGGGTTLIR.L	sll0416	3.08158e-14	2	892.5069	10	5.41149e+06	8.05773e+06	4.94491e+06	7.02903e+06	3.38476e+06	6.06877e+06	6.8004e+06	5.79335e+06	1.25422e+06	1.58713e+06	2.34446e+06	2.28019e+06
K.AAVKQEELPIIGNFSLR.S	SLL0533	9.50775e-20	3	725.0923	28	849780	2.15205e+06	1.26531e+06	2.04813e+06	361099	670818	861145	977004	642255	1.20995e+06	2.06237e+06	1.26528e+06
K.AAVLFENGNWDK.L	SSL0352	4.62318e-10	2	825.93085	1	169364	117096	0	0
K.AAVLFENGNWDKLVTFR.L	SSL0352	5.74063e-14	3	757.07947	8	774041	221378	117639	314342	272180	141437	57277	172213	164536	34431.1	124341	40245.9
K.AAVPLQVGAEYDPR.L	SLL0459	2.66677e-16	2	815.4393	4	49463.3	63439.9	109288	78084.9	19913.4	28670.6	38198.8	20716.6	21392.5	30651.4	44890.1	27821.4
K.AAVPPVQPK.A	SLR0962	8.9909e-13	2	597.87585	1					5841.71	9442.1	16263	6276.83
K.AAVTDSLILQDYLLSSSDDGSVTISR.L	SLL1315	3.13749e-19	2	1435.7424	10	0	2938.97	0	2382.19	5150.58	11465.6	4552.99	5577.77	0	0	0	0
K.AAYAESTETM*R.S	SLR1847	3.78294e-14	2	695.3269	10	3168.1	3955.9	3528.38	3342.6	3289.68	3881.2	7282.52	4257.78	6886.24	10907.3	21175.2	12091.5
K.AAYAESTETMR.S	SLR1847	1.08215e-15	2	687.3271	7	52637.4	77255.6	66274.1	65813.1	159140	254245	331602	247693	19523.8	28195.7	46529.9	30339.9
K.AAYALPENFTVQFVR.S	SLL1570	1.99291e-18	2	935.50415	3	46253.8	21071.9	44736.8	29738	26553.5	9920.9	16075	9922.17	17727.4	8294.26	11683.3	8662.89
K.AAYGFDDNQIEEENLLTLGK.L	SLL0877	7.76045e-25	2	1264.6412	2	10668.6	10616	16319.3	8323.84	6364.37	12397.1	12126.2	5710.51
K.AAYQNIQAR.K	slr2102	1.83625e-12	2	589.8235	3	6659.48	9524.87	13424.9	13011.4					15379.3	20804.4	45252.1	32028.3
K.AAYTVEEFVQLLER.P	SLL0329	3.738e-18	2	906.4903	3	41209.3	3588.18	11500.9	11371.5	31427.8	14561	6864.64	9624.6	21679.9	7103.9	9484.78	6481.36
K.AAYTVEEFVQLLERPR.K	SLL0329	9.64603e-21	3	689.0453	30	1.84125e+06	132770	183769	490980	424178	240878	61100.9	197694	323936	81331.2	125938	77547
K.AAYTVEEFVQLLERPRK.I	SLL0329	1.31903e-13	4	585.0856	1									10476.4	3106.03	3686.09	3851.93
K.ACDDLGGTYSQSGNNK.T	SLR0442	3.54541e-22	2	987.9575	7					7684.84	11209	21534.2	18269.2	9197.53	13928.3	32004	22251
K.ACEEAGIPPAPSR.R	SLL2002	1.2682e-16	2	749.8752	9					61540.1	113744	88897.3	64114	53877.1	99090.4	70504.9	78627.8
K.ACEEAGIPPAPSRR.T	SLL2002	1.64774e-14	3	552.2857	3					24448.3	33454.9	32500.6	38733.6	5202.92	5465.87	5126.33	7856.24
K.ACFAIAGPVIDNTCR.L	SLL0593	6.51099e-16	2	904.9487	9	179065	211552	454226	238811	59456.5	151778	305852	93370.2	166393	400613	489944	300308
K.ACFPAGTVSGAPK.I	slr0738	2.87322e-18	2	775.9135	6					189873	458353	511499	329968	179127	317389	333524	370121
K.ACGVQGIRPGTSCEPIMTTVGSQDTTGPMTR.D	slr0665	1.98675e-13	3	1137.2072	2					0	4255.55	0	5207.82
K.ACGYYSTSK.E	SLL0359	4.22154e-14	2	662.82635	19	40541.3	81431.4	79933.6	92173.9	222625	431780	541012	464713	48362.8	65673.5	80840.9	104175
K.ACGYYSTSKEGQVR.V	SLL0359	8.51316e-20	3	631.9837	14	1331.58	5085.79	2857.53	9436.88	74676.6	291598	443414	1533810	106142	708461	2.23743e+06	1.25956e+06
K.ACHEAVHALGAPR.I	SLL0230	2.27092e-18	3	511.60065	1	1858.04	1939.31	1593.12	2213.05
K.ACIAYAADRER.R	SSL2733	3.78124e-15	3	480.5776	2	4205.7	10144.3	17250.3	12447.5					108412	247249	166662	184589
K.ACQQIQTEMEQQVAFLEK.N	SLL0459	9.54959e-22	2	1235.1227	2	5926.18	7517.27	18428	7558.94					4838.5	6901.75	5752.23	6741.27
K.ACTAEVM*AQEQR.F	slr0841	2.36298e-17	3	518.57745	12	2467.37	3982.27	4685.19	3009.89	6248.01	10262.4	16371.8	8067.51	5497.75	10019.7	17494.2	11476.3
K.ACTAEVMAQEQR.F	slr0841	6.59495e-17	2	769.36475	4	5481.19	11919.4	10738	8112.56	21246.5	40594.4	91140.7	33603.1	32167.9	56981.1	50998.1	41998.1
K.ACYSQGETIDELMQNIR.E	SSR1258	1.70991e-22	2	1086.5123	5	27625.4	27645.6	49555.4	26467.5	33052.1	46515.9	63362.8	45120.8	5733.22	7893	9942.68	5450.85
K.ADADLYALTPEDLASETVDQVR.N	SLL0985	1.30057e-13	2	1268.6298	3	4079.37	1633.36	5421.46	2665.08	0	0	0	0
K.ADAWLNGQEYLLPDNLK.T	SLR1416	1.34721e-14	2	1125.0881	17	48482.4	116499	182425	98175.6	40326.6	78601.5	134232	76117.1	7263.99	39268.9	80541	17935.1
K.ADDIPVNIYRPK.T	slr1643	2.83356e-16	3	563.65826	9	832826	193789	464687	901838	2.78582e+06	619629	1.79071e+06	3.05588e+06	1.714e+06	335720	786613	2.025e+06
K.ADDRIEVDQLNAGDLGAVLGLK.D	sll1098	9.208e-16	3	857.47455	5	117152	71212.3	84194.9	60242.9	29103	33318.3	28365.9	30909.1	98741.7	88618.3	0	39903.7
K.ADDRVVAIGEM*GLDFFK.A	sll1786	2.02932e-13	3	729.71704	1					10396	6614.66	5440.79	6555
K.ADDRVVAIGEMGLDFFK.A	sll1786	4.20903e-19	3	724.38696	3	55446.9	9134.02	10651.5	15511.4	87495.6	56553.9	10313.5	40257.5
K.ADEFAIHLFLANGHREEVR.F	SSL2781	3.15726e-11	4	593.0591	3	65369.9	2179.21	8551.08	12404.8	26782.5	9167.38	0	3744.29	39796.7	2363.52	6096.92	3276.5
K.ADFADRLYESLGCGIVDGR.Q	slr1239	2.90035e-18	3	753.37146	3	17512.9	36655.2	28876.1	49410.8	69303.1	145033	68389	213345
K.ADFCEIYTDVPGILTTDPR.L	SLR0657	2.05038e-21	2	1164.0719	7	8735.53	9107.41	9256.63	11384.8	10281.4	7902.02	7205.07	7097.53	8185.86	7318.9	6640.92	5347.44
K.ADFDLEQLQQDYPR.R	sll1076	1.00657e-18	2	941.4586	1					29424.3	50732.2	54672.7	30277.5
K.ADIEAFFK.N	SLL1651	2.49994e-11	2	614.84204	5	255445	181940	482721	148117	135963	139760	345526	68402.1	237700	214845	248686	168963
K.ADIEWM*EATQK.K	SLR0606	8.87736e-16	2	813.4065	12	508442	822435	904775	946379	200092	370417	738868	436824	117774	185574	219216	192019
K.ADIEWMEATQK.K	SLR0606	8.87736e-16	2	805.4092	9	161240	263866	257105	307437	361908	575336	855506	671476	142908	360362	320602	355381
K.ADIHPTWYPDAK.V	ssl3445	2.98218e-16	2	851.4438	3					112609	263133	182424	93464.6	140248	118633	96546.4	138032
K.ADKGEIIEDGK.A	SLR0872	2.0235e-13	3	536.30334	2									96103	168730	64224.7	171200
K.ADLEKQFQEQAK.Q	SLL0533	2.80884e-16	3	623.0138	4					63438.3	199861	276239	505819
K.ADLEQSLQLLR.D	SLL1663	2.18152e-13	2	715.41095	7	1.18519e+06	880951	1.05547e+06	954427	377570	355125	384812	186303	785407	561329	440016	572961
K.ADLETALHSPLPDKK.K	SLR0320	1.09531e-16	3	689.7301	5	46222.2	67914.3	36818.2	29959.5	102972	198508	158082	103894	64356.7	100203	75380.3	69728.4
K.ADLIDAGIAK.G	SLR0637	2.46428e-12	2	637.8816	10	91251.2	230999	292446	185351	90271.9	235991	258625	144798	251643	622627	616228	397827
K.ADLVTQM*VYEFPELQGIM*GEK.Y	slr0220	6.03724e-20	3	906.791	6	18445.6	13307.5	27856.8	10073.5	18079.6	31478.3	57279.2	21240.1
K.ADLVTQMVYEFPELQGIM*GEK.Y	slr0220	7.06044e-20	2	1351.6887	8	17788	11137.7	25284.4	24214.6	8601.59	6968.25	14463.6	4348.63	20001.1	0	14368.4	10114.7
K.ADLVTQMVYEFPELQGIMGEK.Y	slr0220	4.20925e-24	3	896.13086	12	17634.9	3364.96	17405.8	14176	5058.18	4675.25	0	2677.81	15520.9	6262.93	3571.68	3415.98
K.ADLWDVVVGH.C	SLL0927	2.22583e-12	2	627.83514	1									23324.6	13454.9	15991.2	12803.2
K.ADLWDVVVGHCFSDIALKPTDK.T	SLL0927	2.9991e-22	4	730.3948	10	543684	12302.3	46326.6	90901.2	224658	103406	19123.3	51874.2	119078	16724.1	15953.4	11035
K.ADLWDVVVGHCFSDIALKPTDKTR.F	SLL0927	1.17724e-17	5	635.7464	2	43048.7	2629.99	13148.9	14456.7
K.ADNYPDQLSGGQK.Q	slr1735	9.10005e-18	2	840.9257	12					61102	272743	310833	173916	101811	293686	277407	263005
K.ADPCPNYGPLNQEVNQVLELGAGR.A	SLR1236	1.84294e-21	3	919.12537	4					35672.8	33929.2	24555.5	38876.2
K.ADPEAQSVGIFVLEPVPPAEK.Q	SLR0723	1.48396e-15	2	1241.1786	4	8910.61	11392.3	6000.8	7914.72	14074.8	20618.2	27123.4	19939.4	3171.93	5106.94	1566.78	2534.26
K.ADPVNLGTNFEISIK.D	SLL1213	3.06348e-19	2	953.5324	2	98615.6	36627.1	57850.9	39711.4	55833.6	69793.4	50585.4	16683
K.ADQKFEYPVAWGVDLQSEHER.Y	sll0495	3.15774e-20	4	698.85345	5					27886.8	29956.1	20911.4	21084.6	47757.1	37149.9	18476.5	19927.4
K.ADSEAFLGEPVTQAVITVPAYFTDAQR.Q	sll0058	8.7119e-22	2	1520.7777	6	0	0	2646.46	0	0	3063.17	5044.35	0	0	2484.5	2697.3	0
K.ADSLIVLPQQGDR.L	SLL1730	1.06436e-10	2	778.43164	1	14927.6	32001.1	28973.9	48496.9
K.ADVPLSEM*FGYIGDLR.T	slr1463	1.08368e-19	2	971.9889	19	692658	515399	648405	717318	114260	197813	122025	126418	131473	160456	111387	91754.3
K.ADVPLSEMFGYIGDLR.T	slr1463	8.53797e-21	2	963.996	10	48084.4	20774.2	27626.7	25957.4	6780.53	6398.81	3770.19	3606.97	25425.2	33744.5	16646.4	18293.5
K.ADVQGSLGAILGSLEQLPQGEVQIR.V	slr0744	3.42447e-15	2	1361.7526	9	18585	11434.6	0	0	13421.3	13542.2	2550.62	13648.7	11668.9	7828.49	7478.02	3739.75
K.ADVTMTAGR.D	SLL0542	4.87695e-13	2	533.27686	1	1734.26	1673.33	796.78	756.07
K.ADYSNYGAGVDIAAPGGSTDGKDGK.I	SLR0535	2.94611e-19	3	940.1298	4	19016.9	38382.4	28460.6	21521	28445.3	69551.2	31102	31075.8	20454.3	28127.5	19870.5	23262.7
K.ADYSQPGLVPDTLK.E	SLR1852	1.78087e-18	2	896.4892	15	4.31116e+06	6.13522e+06	3.39288e+06	4.31004e+06	453633	886899	520311	484093	492606	764747	302378	744111
K.ADYSQPGLVPDTLKEK.L	SLR1852	5.49631e-20	3	731.4059	44	3.9245e+06	1.64569e+07	4.77831e+06	1.47495e+07	4.97606e+06	1.03123e+07	4.42985e+06	1.42118e+07	3.75857e+06	9.43057e+06	4.5027e+06	1.45563e+07
K.AEAANFPFCTIEPNVGVVSVPDDR.L	SLL0245	1.89258e-22	2	1374.6742	11	0	19707.6	5818.12	5347.44	10788	17342	11625.3	7999.04	0	2669.64	0	2439.86
K.AEAANFPFCTIEPNVGVVSVPDDRLGK.L	SLL0245	3.19799e-24	3	1063.8851	13	11732.1	38736.5	24190.4	39233.8	8921.43	32937.8	28322.4	39669.4	12617	35301.8	13248.4	30823.4
K.AEADLRDRLNEDTQDR.L	sll1324	1.06144e-19	3	687.67377	9	38636	616046	234271	448055	20732.5	57539.9	94729.8	60278.6	1929.79	4114.33	3902.98	3672.83
K.AEADLRDRLNEDTQDRLIER.S	sll1324	7.45218e-10	3	858.111	1					4266.4	6268.73	8175.31	8678.04
K.AEAETIVTLHCDR.C	SLR0816	4.44142e-16	2	829.9181	5	132099	103065	125533	93595.8	65414.3	75481.3	93810.6	65257.8	648185	850036	218545	445552
K.AEAILTQIR.A	sll1667	1.18806e-10	2	579.8514	1					516775	728555	781968	644757
K.AEALAPEEAGIK.F	sll0837	5.28226e-15	2	743.9205	2					39951.2	39871.2	55300.1	26316.8	29224.8	17183.1	27954.7	22948.4
K.AEASEEFNFEAFNSGLYDR.A	SLR1367	1.68596e-23	2	1170.5322	16	121439	45827.7	170050	89835.4	53964.6	78289.4	85149.2	68908.5	47058.7	46027.5	43825.4	22236.6
K.AECELAIACDAPSEGYFVGPTVFK.N	sll1561	1.28245e-18	3	973.80975	3	17438.2	10939.7	12299.8	7646.43	7140.5	13543.7	19920.2	10514.5
K.AECFAGITK.I	SLR0018	1.33809e-12	2	642.8463	1									172399	120037	108350	144813
K.AEDPEKVLEQAVIDM*QEDLVQLR.Q	sll0617	1.41634e-22	3	991.5238	32	391438	95768.8	182842	154482	415228	347696	166248	129813	450125	213811	93604.3	86075.6
K.AEDPEKVLEQAVIDMQEDLVQLR.Q	sll0617	1.41884e-24	3	986.1937	81	865476	141952	37432.2	230009	237059	146417	47723.1	85796.9	698949	221608	85851.4	142034
K.AEDSVIIGSQK.G	slr0417	3.3851e-14	2	717.90485	2					182392	180851	201557	109171	48206.2	45795.2	28951.1	51845.2
K.AEDYSPEQIAQM*K.A	sll1549	5.09667e-18	2	907.4465	11	260357	403352	968770	253603	84725.9	111329	307983	83616.7	69521.8	97502.6	377917	48355.5
K.AEDYSPEQIAQMK.A	sll1549	5.09667e-18	2	899.4486	6	489025	766942	3.24882e+06	257288	153942	199106	676543	140573	91026.4	165199	364515	113769
K.AEEMEATLK.A	SLR1932	1.24911e-12	2	655.34894	2					97543.4	131636	226137	100207	79396.9	99127.9	140413	137195
K.AEEQFWPALNNIGLIEYEQGK.I	sll0837	6.88103e-19	3	913.14276	2	8312.64	2723.72	5411.47	4870.48	16441.5	8455.63	4986	0
K.AEFGFEAQVSLR.E	SLL1213	5.59845e-16	2	749.3945	8	178981	47893.3	66110.6	85863.4	52806.1	54794.7	33403.3	42414.2
K.AEFM*NPGGSVK.D	sll0712	7.13253e-16	2	720.8722	4					105510	145598	310099	115067	67007.8	105711	126690	118809
K.AEFM*NPGGSVKDR.A	sll0712	2.49417e-16	3	571.2938	4					26295	46997.4	74394.4	74605.1	12546	25612.4	36237.9	31154.3
K.AEFMNPGGSVK.D	sll0712	7.13253e-16	2	712.8746	4					227065	420710	439419	176496	498146	818928	926202	921627
K.AEFMNPGGSVKDR.A	sll0712	3.02646e-16	3	565.9618	2					18374.8	53391.7	72374.6	93953.5	56131.1	162293	201254	128079
K.AEGDNGEPEVTSEEIAHIVASWTGVPVNK.L	sll0020	7.47773e-14	3	1108.5564	2									9407.01	3607.07	1523.24	0
K.AEGETLWDGVR.N	SLR1468	1.33378e-13	2	688.8512	2	55255.5	73726.7	96960.6	55276.2					88460.4	95377	84351.2	87221.3
K.AEGFWQEFR.C	SLL0842	1.5116e-13	2	657.3241	3	219044	108160	371371	125384					29208	20208	25243.5	14438
K.AEGGTAIDEGLK.L	SLL0103	3.61357e-15	2	725.3961	2					24117.3	51684.6	39455.3	26189.1	121887	160202	61433.1	104299
K.AEGLDAIFTR.H	SLL1559	5.19856e-13	2	618.8393	15	1.4165e+06	1.41199e+06	2.12747e+06	1.87389e+06	3.23584e+06	3521652	6.26112e+06	4.09809e+06	5.50485e+06	5.87461e+06	7.17356e+06	8.6558e+06
K.AEGLIKDLK.E	sll0170	1.84269e-11	2	709.94995	7					441096	1.55303e+06	1.03658e+06	1.58155e+06	370178	1.17373e+06	497091	882220
K.AEGLTAVHHR.K	SLL0550	3.42295e-14	2	617.8425	3	941.56	978.8	329.82	1240.95	4778.59	6137.57	3897.75	8553.62
K.AEHPELKK.L	SLL0788	9.54253e-12	3	461.94626	2	2574.99	3684.79	764.86	1683.52	14005.7	25871.4	8321.6	18184.8
K.AEIAAAESLQTNLYR.L	SLR1301	1.04093e-18	3	598.65533	9	144447	128959	169461	181354	114293	173412	151869	126131	67854.9	117344	72621.7	67293.5
K.AEIALAEQK.T	SLL1021	1.54315e-11	2	630.87286	5					710387	2.71293e+06	2.50445e+06	2.93251e+06	495571	1.62649e+06	942860	1.86845e+06
K.AEIKEGVNPK.R	sll0226	1.80611e-12	3	506.3061	1									2581.28	7115.21	7219.94	9216.18
K.AEINCTEAVGVSEAPR.G	sll1226	2.78435e-19	2	923.9562	6	64450.2	79212.1	73532.8	62073.6	16168.6	54778.8	40773.6	38005.8	5743.93	12296.7	4093.26	7913.9
K.AEIQQAVNGVLESGQFILGK.T	SLR1666	1.25282e-18	3	797.4464	9	39661.1	16235.5	26366.5	26039.5	26197.6	27258.3	23653.5	23883.2	5391	4304.29	3990.74	3440.92
K.AEKNEPSDTKPPRPSGVYDAPYR.V	SLR1169	4.97762e-12	5	602.11945	1									42208.9	58541.9	66424.7	60554.9
K.AELDPDSQDRLER.N	slr0357	1.29928e-13	3	563.28406	1									99442.9	65386.4	33500.6	58503.9
K.AELEALTPIVNQANSDSYNLDSALELLVR.T	sll1499	3.5024e-13	4	826.4385	2	0	0	0	0	5318.89	2189.58	0	0
K.AELEESKTPESSSSS.E	slr1046	7.10646e-11	2	928.45654	1									1057.31	2122.58	1305.18	2048.3
K.AELEESKTPESSSSSEK.A	slr1046	2.55345e-22	3	753.0534	6					27807.9	30859.7	14433	15605	72975	84787.8	39380.4	84417.1
K.AELEESKTPESSSSSEKAS.-	slr1046	6.93259e-19	3	805.7414	2					750.17	676.71	981.02	956.28	879.39	2590.19	3412.51	3357.16
K.AELEQNKNPFQAK.L	slr2058	9.56506e-18	3	650.36426	4					273584	366255	134342	190753	384381	405085	131849	405851
K.AELESIGASVEYQEFPM*GHAIPPM*ALAR.L	SLL1284	4.08699e-15	3	1064.1946	1	0	0	8745.06	0
K.AELESIGASVEYQEFPM*GHAIPPMALAR.L	SLL1284	1.94091e-15	3	1058.8624	5	13222.2	0	20970.8	25437.3	9375.02	12967.1	12548.5	20351.7	0	4736.65	3185.3	2570.54
K.AELESIGASVEYQEFPMGHAIPPM*ALAR.L	SLL1284	4.00784e-11	3	1058.8605	1									6670.82	4462.62	14437.5	8551.35
K.AELESIGASVEYQEFPMGHAIPPMALAR.L	SLL1284	1.24971e-22	3	1053.5323	8	17835.7	3273.33	9826.36	0	13264.2	17371	11069	18800.2	54708.7	42853.3	63347	12111.6
K.AELFGIALDR.Q	SLL1564	1.67711e-12	2	624.8573	1					14273.9	20919.8	15304.1	10864
K.AELIEGIVHVASPLR.H	SLL1072	5.28717e-15	3	583.34607	2					37188.6	25962.5	34581.8	17532.2	27046.1	18065.6	22638.6	14672.7
K.AELIGPEPEGADVVEQGLGWHNQNGK.G	sll1987	3.51529e-11	3	1011.84393	5	14379.6	14565	37165.9	14539.6	32387	41577.5	49309.5	17515.1	31825.2	41181.4	46992.2	40896.1
K.AELLEMVER.N	sll0865	4.28885e-10	2	617.3353	1					16116.2	25391.5	33472.6	19392.3
K.AELNLAMAR.F	SLL1481	4.33628e-12	2	566.8168	1					158075	226654	286713	154763
K.AELTETEEAYVLK.L	sll1514	7.25788e-17	2	892.4824	10	146431	97624.7	66419.5	128823	85483.8	133325	48816.4	63720.2	67946.7	135263	39466.1	79912.1
K.AELTETEEAYVLKLELPGM*DPDNLDIQAAR.D	sll1514	1.27451e-13	4	912.9698	4	63141.9	34212.3	40194.8	75557.2	13148.5	10873.7	7687.13	11465.4
K.AELTETEEAYVLKLELPGMDPDNLDIQAAR.D	sll1514	4.91362e-14	4	908.96954	9	25246.1	4986.29	0	13644.6	2576.8	6690.51	0	3045.45	2985.35	2299.5	1760.16	2525.1
K.AELTIPAGTQPNTVLTLENK.G	sll0897	1.32618e-21	2	1199.675	2	0	0	0	0	0	0	5281.83	0
K.AENLAYLDEAK.Q	SLR1763	1.69393e-14	2	762.9107	5	227880	254807	149767	187172	357533	864655	448399	352174
K.AENYLPWNEFVK.W	slr6012	2.3452e-17	2	899.4743	3	45420.4	40235.9	23021.7	57028.1	23895.3	44097.1	13544.7	32742.4	33068	41151.6	11540.4	53030.8
K.AEPPVLQPQSPQER.E	sll0336	9.99462e-15	2	860.4603	4					44942.7	64654.9	38708.6	41361.2	20520.5	50896.6	30257.1	40221
K.AEPQALILAQK.L	slr0357	1.25462e-13	2	735.4497	2	19516	14964.6	19092.5	16101.2	28736.1	31834.2	40331.5	15843.8
K.AEQDLLASHPAITGVPYNGLSEQTTER.F	SLL0887	4.06664e-14	3	1014.8423	13	45894.7	49486.2	34043.3	25583.7	47068.4	48240	22350.4	32288.4	55881.2	53927.9	24150.6	30762.4
K.AEQIELGIHTARPGVVVGR.G	sll1804	8.201e-15	4	537.3109	5	150217	155708	91197.1	120803	43720.5	38178.1	54392.4	35688.8	38580.6	32465.6	12835.7	27638
K.AESATSSTEANGGESKKEMLVGSALR.E	SLL0148	9.62369e-13	4	761.6432	1									8061.57	17124	9581.39	11136.6
K.AESFLGLTDLEGR.D	SLR0222	2.88792e-16	2	776.4104	1	49338.6	38083.3	33811.8	38489.2
K.AESGSTIVNQLR.R	slr0557	7.21337e-15	2	709.88983	2					34844	32900.6	20949.4	19262.1	40646.2	32795.9	19151.5	26832.1
K.AESGSTIVNQLRR.L	slr0557	2.1183e-11	3	525.62915	2					295332	366584	248779	395904
K.AESTAQQIIQLYR.Q	SLL1761	2.63178e-15	2	832.959	1									18566.9	22963.2	35142.4	31226.5
K.AESVPEPEITK.A	ssl5065	1.23174e-12	2	744.41266	1					31001.5	28613.2	57709.3	26016.7
K.AETNFAEEVAAAAK.G	sll1261	1.88677e-18	2	855.4528	6	281416	95758	297172	127928	61484.1	95572.8	150015	23673.5	170688	162144	85701.4	159399
K.AETNFAEEVAAAAKG.-	sll1261	2.06338e-18	2	883.9611	13	1.47693e+06	2.15808e+06	2.29733e+06	2.16896e+06	229796	433686	563066	238182	155917	275000	256425	306610
K.AETQALQAR.L	SLL1665	5.66568e-12	2	566.31573	1	1545.52	1781.69	2411.08	1369.49
K.AETVGILPHWEIGEK.L	slr1703	1.23567e-19	3	656.36536	12	466226	495281	667047	445317	233236	334665	307113	224308	164186	292066	120241	167149
K.AEVLEIM*PQGFLPR.L	SLL1381	2.49773e-11	2	880.9812	2					5278.3	5751.92	7087.98	4410.07	12973	10389.5	13053.2	12372
K.AEVLEIMPQGFLPR.L	SLL1381	5.73126e-18	3	581.9915	2	59504.7	35058	69877.9	57775.2					6797	7016.84	15105.3	6931.29
K.AEVTDAFPTIVPFASEGQGTLSR.A	SLR0042	1.22416e-16	2	1269.1555	16	66906.3	87336.3	10114.4	87521.5	61056.2	22529.5	14163.7	18464.2	5936.58	13756.9	2180.86	12876.7
K.AEWRDEENYFFR.L	slr0649	1.29553e-16	3	602.61694	3	83287.1	23903.8	41828.2	57897.5	77453.4	72452.2	35016.4	74281.6	29355.6	21441.3	16817.1	13725.5
K.AEYGQYETSIPGVFAAGDCR.R	sll1027	7.9962e-23	2	1168.0426	9	35339.4	80603.2	27605	60859.2	10109.2	28223.7	21689.9	11152.7	43822	74517.3	65869.2	58064.2
K.AEYGQYETSIPGVFAAGDCRR.G	sll1027	1.13333e-14	3	831.06366	2					54420.9	97927.9	89673.5	85933
K.AEYLVSYDNLSAK.L	sll1579	2.23387e-17	2	880.96954	6	9815.57	47537.2	32627.3	628404	13457.4	19799.4	23741.5	337162	10146.8	25915.7	21759.8	582988
K.AEYPQATIDVIVEPR.A	SLR0606	1.98334e-19	2	922.99725	16	1.26785e+06	713402	1.43917e+06	885863	856842	1.20144e+06	635931	621952	1.17986e+06	900644	719134	801729
K.AFAAEDYQLDLFREEAQQHR.R	SLL1276	7.69782e-14	4	646.0694	3	25080.8	22663	28646.2	19715.1	47303.1	57050	50679.2	56068.4
K.AFAATEAGDFVTAEK.Y	SLL0886	5.45894e-19	2	908.4688	8	1.31337e+06	615521	726973	519254	154065	235668	126050	49463.4	261368	244143	186852	219610
K.AFAETALDFQELLK.S	SLR0723	2.03969e-17	2	942.5234	4	61391.6	25140.9	36797.5	38492.1	30422.7	35181.8	23886.7	20908.2
K.AFAGGAGSGDSDGGTSSR.I	SLR0374	4.35372e-14	2	850.88257	1					5343.16	4665.63	5756.08	2297.58
K.AFAVEDLPLGALSHDHDQQLQDFLR.G	SLR1134	2.54125e-22	4	745.6327	1					7918.4	11028.7	13729.1	8538.86
K.AFDQSYCGAIEAVVDLICQR.F	SLL0083	1.19667e-17	3	820.4006	1					2421.36	1113.19	977.87	1054.95
K.AFECGGVDYITKPFQIEEVVAR.I	SLL1673	3.28941e-22	3	939.4897	6	50214	46837.2	33397.2	82728.3	95609.9	187996	53978.3	219712	110424	162305	102699	123727
K.AFEEIQTLIGR.V	slr1218	7.35765e-14	2	710.8997	5	547980	257005	745121	492011	35440.5	58399.6	64174.7	31971.4	87872.5	110397	70407.1	82404.4
K.AFEPGLLAK.A	slr1030	8.1027e-12	2	617.37476	5					229805	307213	372992	246779	2.68897e+06	4.30145e+06	4.57957e+06	3.80191e+06
K.AFEPGLLAKANR.G	slr1030	9.68318e-10	2	787.97144	1									60371.6	7061.5	7527.98	9714.8
K.AFFDDRPGGDITFLSGSGNDEISIAR.D	SLL1951	8.972e-24	3	967.8096	2	33927.5	5444.12	7705.54	16389.4	14957.2	4660.25	4059.69	11601.2
K.AFFTTSQLDTK.D	slr0940	2.62139e-15	2	774.4215	4	50297.3	29212.8	73030.2	39200.6	86515.6	107293	151136	76346.6	74298.9	53153.4	75233.2	47938.8
K.AFFTTSQLDTKDK.I	slr0940	6.10357e-18	2	967.5319	3	42282.8	40998.6	46990.9	35642.9	118360	176880	191235	110458
K.AFFTTSQLDTKDKIANSIALATSPIVR.G	slr0940	4.0423e-14	4	836.2211	1									12561.9	31082.2	22286.4	10179.9
K.AFGEAWAER.Y	SLR0116	4.76627e-13	2	590.798	3					194099	426186	427511	512117	276869	521578	509871	645082
K.AFIGAM*VNGM*EYLQTFGEDTVPYR.R	slr0335	5.47278e-15	2	1443.6775	8	6600.45	12099	0	12229.4	2777.79	17885	0	5432.22	2666.29	1918.7	0	0
K.AFIGAM*VNGM*EYLQTFGEDTVPYRR.F	slr0335	1.19131e-10	3	1014.8175	1					4768.46	22371.5	1030.31	9633.4
K.AFIGAM*VNGMEYLQTFGEDTVPYR.R	slr0335	1.90337e-10	2	1435.6791	1	0	2403	0	2787.92
K.AFIGAMVNGM*EYLQTFGEDTVPYR.R	slr0335	5.57656e-19	2	1435.6807	6	16541.5	6277.84	0	15069.6	1651.93	2918.89	0	3997.24	3950.65	0	0	0
K.AFIGAMVNGMEYLQTFGEDTVPYR.R	slr0335	1.16367e-23	2	1427.6821	7	61775	27844.7	0	3321.6	6982.86	8358.64	0	0	7425.61	2181.85	0	0
K.AFKDNPQLPNLLLAPEFK.Q	SLL0329	1.73932e-15	2	1244.2252	10	232183	50914	42721	76008.5	118443	53992.8	34404.5	31293.8	18961.8	11121.9	7663.14	8954.8
K.AFLTYAFGGTDKYDGR.Y	slr2097	3.34748e-19	2	1035.5295	11	427920	170497	934810	614975	139113	232196	506573	439094	104242	110847	331236	117374
K.AFNADATSAFGGIVALNQPLDGPTAAAM*VK.T	slr0597	9.75e-17	3	1074.8964	2	3040.85	2764.45	3275.48	1214.87
K.AFNADATSAFGGIVALNQPLDGPTAAAMVK.T	slr0597	1.32688e-19	4	802.42474	5	9570.1	9027.59	11681.2	0	5304.39	4743.66	953.13	2000.74
K.AFNLGGADYITKPFQMEEVLAR.I	SLL1229	4.00376e-20	3	920.1548	2	39499.5	13304.6	30981.3	40230	15723.6	24558.8	10919.9	22515.7
K.AFNQVIPEK.N	SLR1471	1.11763e-12	2	667.3888	3					2.28148e+06	2274557	3.59208e+06	883910	1.91595e+06	1.82818e+06	1.21561e+06	1.27982e+06
K.AFNQVIPEKNSQILTPTYSVTK.G	SLR1471	1.30921e-20	3	970.88104	5	70220.9	93608.2	78406.8	61875.2	65538.3	100641	121315	83627.4	38389.5	60966.3	41744.9	51220.3
K.AFNQVIPEKNSQILTPTYSVTKGEDR.I	SLR1471	1.6458e-15	4	842.956	13	48192.1	96772.8	59649.4	66750.3	90702.2	181527	143341	131217	112678	185393	203292	110599
K.AFPLDM*ELALQEALR.L	SLR1800	4.27052e-15	2	939.00244	1	17309.1	7464.23	7310.83	12005.9
K.AFPLDMELALQEALR.L	SLR1800	2.77027e-18	2	931.0088	7	202708	42779.4	47845.4	69850.9	42857.7	29031.2	11169	20474.8	11318.2	4509.41	2204.3	3838.4
K.AFPVAIADIPPLAVTR.I	sll1941	2.3903e-16	2	898.0348	2	22970.3	24206.4	44403.1	21786.7	24942.1	25913	41448.5	26705.2
K.AFQDM*VALEK.G	SLR1349	7.82038e-14	2	728.39014	14	310848	440059	663575	577269	385997	581801	916282	610588	435702	744798	977157	1.02023e+06
K.AFQDMVALEK.G	SLR1349	5.85065e-14	2	720.39105	20	188711	332303	436562	291394	299261	520630	896503	475948	168233	266665	510372	371748
K.AFQDMVALEKGAIANPDEQR.M	SLR1349	4.63431e-24	3	831.09955	4	33417.8	90309.9	48456.3	273104	19012.6	41574.1	47733.2	164787
K.AFQEFGYLSQLPEGFTDHPGDALAYQCWK.L	SLL0102	4.53704e-24	3	1221.9181	7	29549.9	5127.15	3037.24	8108.65	5527.56	0	0	0	25417.6	18725.8	19676.6	2755.42
K.AFSETDFTEDLK.K	sll5080	1.62714e-16	2	845.9247	9	617939	581840	1.07353e+06	620523	289244	369635	749245	342678	139666	209406	285912	195507
K.AFSETDFTEDLKK.F	sll5080	7.04553e-18	2	982.02094	6	225443	205176	297186	244838	338560	411901	529174	368900	72145.6	89056.1	89019.6	88773.5
K.AFTELEVR.Q	SLR1443	3.83308e-11	2	554.8099	1									403579	431227	280153	480691
K.AFTLITLGPITGQDSTGAIAQK.M	slr1406	1.06797e-24	2	1246.2083	13	75528.9	0	0	53979.7	43185.8	37492.8	23773.8	35223.6	41567.6	34621.9	27236.5	32152.7
K.AFTPPPKVDSAVIR.L	SLL0708	5.8539e-13	3	596.0184	2	41591.8	67961.3	72296.2	59376.1	29632	54600.9	57115.1	37533.9
K.AFTSLEDLGR.V	slr0197	3.65426e-13	2	626.836	3	97410.6	130940	148355	133044	60225.1	99325.7	163954	93761.2	61943.4	157432	139349	126581
K.AFTYSADLSDAQATQGIIPK.A	SLL1709	4.21767e-12	2	1193.1305	4	8577.59	6807.97	10837.6	13054.6	0	4836.11	7497.08	0	4308.45	4962.19	4560.58	4197.96
K.AFVADVHQGNIKPPTAPK.F	SLR1349	1.1242e-19	3	775.11414	5	45760.8	46693.9	47828.2	41157.8	80084.9	128545	153108	113344	56967.8	88728.7	55554.8	56142.8
K.AFVEFANDKFGR.V	SLR0315	1.3192e-16	3	563.63824	3	199991	82942.3	172316	175554	120087	76048.4	83267.7	62975.8	157793	95932.5	73315.3	63318.3
K.AFVLAPNYDIGR.T	SLR0442	2.02428e-15	2	740.4078	5	430681	678428	638522	770306	92898.2	136145	141804	164261	40795	60357.2	54378.1	62494.9
K.AFVLAPNYDIGRTGNGSYEGMLLGK.T	SLR0442	7.86065e-10	3	978.17505	1									13563.8	23164.4	57076.2	27986.4
K.AFVLNLLQEGR.S	SLL0219	5.92528e-14	2	702.4105	6	198777	214167	131355	371816	324797	990443	321352	1.17299e+06	472899	867609	336975	906476
K.AFVTGGAAR.L	slr2067	2.18181e-12	2	497.28275	21	3.21457e+06	7.39776e+06	7144.28	4.55457e+06	5.96257e+06	1.36115e+07	27556.6	7.40136e+06	747421	2.04091e+06	19940.4	1.18551e+06
K.AFVVPGSEQVK.Q	sll1470	2.90837e-15	1	1448.8345	7	104769	189179	251079	140858	460302	1.27524e+06	2.39303e+06	1.03133e+06
K.AGAAM*LNYVAVK.G	sll1085	4.37626e-14	2	756.42834	1					46096.1	83453.4	137164	41347.7
K.AGAAMLNYVAVK.G	sll1085	2.69272e-16	2	748.4299	1					19305.8	22553.8	121162	24947.8
K.AGADGTIPIPAIAGQPRPPSGWPITTQSGPAEIELAEYLTAK.G	SLR0565	4.51782e-14	5	906.8892	3	5051.02	1451.33	2496.51	3996.51	0	0	0	0
K.AGADIISVHVEHNASPHLHR.T	sll0807	1.27329e-23	4	576.80786	2	174933	37611.4	32990.5	30848.6
K.AGADLGLKVEIDHLENPR.V	slr1020	5.81114e-22	3	745.7517	2	66950.2	21561.8	10637.5	20333.4					77912.9	44269.4	16530.3	21382.3
K.AGAELEASK.S	slr1159	6.78458e-12	2	582.3308	6	57012.1	87955.3	195329	71354.2	20451.6	10340	70411.5	24797.2	26547.8	19051.5	98579.3	65910.9
K.AGAELVATAK.E	SLL1682	5.71531e-13	2	609.86743	3	52195.1	60470.6	41931.3	61844.7	85622.4	200288	216149	138541	190557	341561	262755	366174
K.AGASGIGNPVLYVGSTTGR.D	sll1056	2.71447e-23	2	961.0165	8	832773	1.13186e+06	858527	1.05633e+06	262120	600092	627700	583552	276494	697092	579355	818016
K.AGASYYGVSDLTALATDTHK.F	SLR0825	7.11e-21	3	777.0696	3	54019.7	34770.8	61981.5	35490.3	20404.4	25279.4	26605.2	12337.2
K.AGASYYGVSDLTALATDTHKFEAR.Y	SLR0825	2.90054e-25	3	944.8185	7	30137	17754.9	32821.3	26787.5	58339.8	59647.8	69101.6	77388.5	28611.4	45829.4	67426.5	35795
K.AGAVM*VDNSSAFR.M	slr0549	1.84363e-17	2	742.86664	10	137716	217447	293926	201130	212305	346676	850686	381812	101065	149373	229315	166437
K.AGAVM*VGK.T	SLR0877	1.32905e-10	2	518.8064	4	1689.8	3901.92	3463.93	2995.25	8300.04	10123.3	27039.7	16441.6	1455.66	1748.22	3712.52	3325.09
K.AGAVMVDNSSAFR.M	slr0549	5.07918e-18	2	734.87	6	101269	181640	241303	161593	14037.5	20597	31710.9	20071.1	266617	443419	968687	540107
K.AGAVMVGK.T	SLR0877	1.32288e-11	2	510.80878	1	2889.68	8088.1	7324.32	4998.48
K.AGDRQGAATMLQTAAK.T	SLL0103	9.57171e-11	3	626.6742	1					37261.7	55066.8	49230.8	115822
K.AGDRYLPIAGQLIFNPGENQK.N	SLR1028	6.01089e-14	3	864.133	1	14369.7	3828.99	4743.91	6732.77
K.AGDSGTTDFQFM*LR.G	slr0746	3.32489e-14	2	853.4008	1					22074.7	53179.7	41466.1	45712.5
K.AGDSGTTDFQFMLR.G	slr0746	3.01951e-19	2	845.4041	3	33574.4	69069.7	64027.1	54956.3	37961.7	90892.9	96025.6	51670.8	56338	122542	92368.7	70124.4
K.AGDVIGAVR.K	sll1812	7.00182e-12	2	501.29688	3	119683	242957	193679	171821	314892	838648	776376	435383	122681	166608	226152	217319
K.AGDVIGAVRK.G	sll1812	6.0894e-13	3	425.26517	2					29937.6	53587.2	80090.1	74384.4	50409.4	76441.3	159426	133703
K.AGEEQVEVK.K	sll7043	1.37539e-12	2	638.8518	1	670.56	1273.68	1093.7	775.15
K.AGEEQVEVKK.R	sll7043	6.44324e-12	3	516.9693	1					3502.22	1881.7	4637.17	3467.66
K.AGEEVKWVNNK.L	sll0199	5.09302e-16	3	569.324	2					42452.6	215175	102728	222564	27811	139152	334200	83588
K.AGEGILFLDPGDR.N	slr1238	2.26292e-15	2	752.40204	5	112903	42916.2	102203	55105.3	141697	117496	130633	62752.5
K.AGEGILFLDPGDRNFNSLVEISTQHGKEPVM*VQR.F	slr1238	3.44637e-15	5	812.22815	1					11359.6	2852.27	3570.08	5289.12
K.AGEGILFLDPGDRNFNSLVEISTQHGKEPVMVQR.F	slr1238	1.76572e-17	5	809.22864	2	17572.5	0	9405.15	0					11935.8	5643.13	5427.26	0
K.AGEIIPEVVR.V	sll1209	8.6974e-12	2	613.8648	2					87759.4	115230	229684	146899	31507.9	41580.8	52899.6	45690.3
K.AGEKDVLERR.S	SLL0141	1.33894e-10	3	487.618	2	7777.66	15060.3	7601.64	9913.78	14914.2	18140.5	26409.6	26341.5
K.AGENLPFLTSGR.N	sll1076	2.45808e-13	2	703.3818	1					40803.9	39881.1	69500	25972.5
K.AGERDTLQAPLWGSDGDREVIQAAK.S	SLR0064	9.24086e-16	4	743.64136	1	20767.4	46834.3	28018.3	32545.1
K.AGETITTFQLKPETILDEVR.A	slr0665	2.57281e-20	2	1275.2072	21	353749	346574	287254	393153	88345.3	116857	82693.6	114695	145489	226222	82389.1	74245.1
K.AGEVFSSLGSEEQQR.E	SLR1768	7.49937e-18	2	884.434	8	200190	320506	239831	312246	84638.5	172281	155609	103651	23245.7	38727.1	28142.5	35279.6
K.AGEVHAIMGR.N	slr0075	4.802e-14	2	592.8196	1	7628.39	7428.29	4343.41	6656.58
K.AGFDTLVEAGYQPELAYFECLHEVK.L	sll1363	1.03914e-24	3	1058.8634	39	237206	875.15	19197.4	19044.6	132484	54542.7	4417.95	34166.8	205081	31899.8	65907.7	35326.2
K.AGFEGGQM*PLYR.R	sll1813	9.10923e-13	2	743.36694	3					277336	404045	682609	383224	1134519	1.62634e+06	2.13745e+06	1675865
K.AGFEGGQMPLYR.R	sll1813	1.11928e-16	2	735.3695	9	1.53776e+06	3.27356e+06	2.28309e+06	1.86912e+06	433642	789018	981511	519906	98271.4	170860	150769	145631
K.AGFKAGVQDYR.L	slr0009	2.54496e-15	3	500.27676	17	29313.8	109748	52516.9	157607	277208	851104	849524	2.84887e+06	569958	2.27143e+06	5.71177e+06	2.47557e+06
K.AGFLTAIAK.G	slr0665	1.19941e-11	2	590.3691	2	182154	87585.1	104517	84498.4	169481	131649	128469	63212.4
K.AGFLWYSALEETTK.A	SLL1305	7.88344e-19	2	952.5085	7	95120.9	38936.5	42750.1	73501.4	13043.2	16347.7	7446.04	10578.9	2547.16	2578.47	823.47	2123.12
K.AGFSQAGLASQKPR.L	sll1614	2.487e-18	3	569.32214	2					46675	100999	118351	118379	47365.7	140959	117381	126403
K.AGGDLLEQVELFDEYR.G	sll1553	2.98557e-20	2	999.501	14	699109	240102	305997	285521	73501	90486.6	50806.2	37008.2	84575.2	68765	28859	40228.1
K.AGGDLLEQVELFDEYRGQSVPAGQR.S	sll1553	5.59511e-18	3	960.1535	11	137355	223398	141192	266047	64424.7	81407.8	47151.2	116411	17547.5	49156.4	26405.5	30619.3
K.AGGLGDVIYGLSR.E	sll1393	3.68267e-16	2	711.3984	6	67513.1	47847.2	89179.3	60828.3	88273.1	131530	143735	81917.4	275327	308433	281286	266440
K.AGGPDYLLQFLEPR.H	sll1561	2.4176e-17	2	860.46356	7	85324.7	87010.1	58158.3	105232	25228.7	47196.2	34176.5	43012.8	17714.8	17114.2	13047.6	13244.1
K.AGGPVDAVINELKPLLEEGDM*IIDGGNSLYEDTER.R	SLL0329	8.19065e-16	3	1345.3478	16	3636.26	3598.51	3884.46	5126.82	5740.72	5104.61	0	7532.82	21662.7	1311.15	0	1603.04
K.AGGPVDAVINELKPLLEEGDM*IIDGGNSLYEDTERR.T	SLL0329	2.21473e-16	5	838.83215	33	65886.8	10277.1	12788.8	24617.1	237721	54855.7	11786.4	95474.6	98978.3	13342.9	9235.35	12694.4
K.AGGPVDAVINELKPLLEEGDMIIDGGNSLYEDTER.R	SLL0329	1.03338e-16	3	1340.0177	15	19041.5	0	0	0	13415.5	4923.12	699.66	4888.99	24579.4	0	0	4108.31
K.AGGPVDAVINELKPLLEEGDMIIDGGNSLYEDTERR.T	SLL0329	1.09496e-16	5	835.6309	20	114581	34344.7	0	78395.5	182001	34601.3	0	27018.1	34850.2	10827.8	0	4823.4
K.AGGTYLSSEELR.E	SLR0416	4.96116e-15	2	713.8678	1					25799.4	23691.9	64017.5	19190.9
K.AGHWVTVYER.E	sll1027	3.28803e-14	2	681.35626	3					96058	119502	71681.1	74277.4	55701.8	71145.9	28539.7	18218.2
K.AGIAWSDYK.A	sll6036	5.02318e-13	2	649.85156	3					388827	694526	788798	538251	149940	169492	143118	145598
K.AGIETYLFER.K	sll1091	2.2166e-13	2	671.8614	14	4.78113e+06	5.77313e+06	4.83223e+06	4.49645e+06	197525	313440	314227	209065	1.14602e+06	1.859e+06	1.57318e+06	1.04628e+06
K.AGIGVDDILEAIVQQVPPPADTVDQPLR.A	SLR0604	1.17998e-16	4	768.4207	1	4455.95	0	2322.13	2446.2
K.AGIGVPEDCPSLGHLLNHAFEQK.V	slr1550	6.42926e-25	4	695.11383	4	17124.3	5611.84	30614.5	10461.6	15929.7	18816.5	21155.2	10955.1	122084	88692.2	68757.1	58502.6
K.AGIHGGEIVCQGDFQTLLK.N	slr1844	4.45158e-18	3	777.7501	2	35384.3	18086	25031	23030.8					14299.4	24853	37224.9	28387.6
K.AGILTDPTQVVHVPFGLVK.G	sll0502	2.34488e-21	3	760.4499	4	89033.1	90508.8	119961	76605.6	65607.6	117090	72413.9	65731.8
K.AGILTDPTQVVHVPFGLVKGEDGK.K	sll0502	2.55865e-19	3	970.5519	5	10916.9	120432	18369	141509	43481.9	147052	52771.3	131283	1175.3	4288.77	2498.79	2325.81
K.AGISDEDLAQK.V	slr6047	3.68454e-14	2	717.88635	1					63117.7	83477	101791	114674
K.AGITDIGIIISPETGEEIK.T	sll0207	5.52128e-18	2	1122.6353	8	14729	3079.2	16358.4	9013.1	2494.84	29830.8	73032.7	22016.8	31386.6	46815.1	55159.6	25821.8
K.AGIYTDFK.K	ssl0601	1.44477e-11	1	1202.6637	2					246882	525510	954936	395130
K.AGIYTDFKK.H	ssl0601	6.2559e-13	2	737.93353	4	63037	142356	144424	99504.9	155638	261211	329321	161283	130260	132599	218865	182944
K.AGKPLHFK.G	SLR1251	7.64352e-12	3	443.94855	1	25572.6	26512.9	5857.26	17054
K.AGLEMTVR.Y	SLR1051	2.27353e-11	2	510.7846	3	117470	78446.1	149370	46238.4	174677	151534	192055	89215.6	444665	329929	315920	232003
K.AGLINVLIEIPAGSK.N	slr1622	1.29532e-17	2	892.05176	32	1.29848e+06	628555	775545	1.2317e+06	94741	101130	51153.9	62574.7	428800	339062	253296	256351
K.AGLIPILCVGESK.A	slr0783	2.19727e-16	2	822.9845	19	1.87986e+06	2.67678e+06	5.05024e+06	2.92058e+06	1.05806e+06	1.29263e+06	2.20433e+06	1.22746e+06	299731	422936	869702	642208
K.AGLIQESVDAFQQAIALYEQR.Q	SLR0626	1.37017e-25	2	1247.664	5	0	0	0	0	8730.17	1499.39	1278.27	0	6897.23	244.34	920.9	1466.16
K.AGLKPDLEIVAK.A	sll1172	5.16119e-15	2	843.5282	7					592117	1.18766e+06	989692	1.1066e+06	977256	1.41718e+06	897943	1.17737e+06
K.AGLPWLK.R	SLR1875	6.13534e-10	2	536.8402	2					58639.5	55024.7	68981.4	35719.3	119947	86057.5	69424.9	96709.5
K.AGLQVWDVEELPTHGGSLR.V	SLR1610	2.8489e-21	3	736.7229	3	29554.7	17121.1	46792.2	30465	41098.6	52734.8	54527	71495.5	43800.1	85116.6	74038.9	56522.7
K.AGLRPMAGFIIGFDGEK.Q	SLL1242	1.61717e-11	3	689.7165	1	39781.7	8222	16024.4	13609.6
K.AGLYEM*SEAFFR.R	SLR2079	1.42143e-15	2	790.8799	3					66155.5	82972.9	95500.4	87288.8	26830	24912.8	33004.2	28020.1
K.AGLYEMSEAFFR.R	SLR2079	8.95143e-17	2	782.8844	2	53325.1	17859.4	57677.9	41875
K.AGNQSMVEFCQEHALPYEVCGK.V	SLL1495	1.18629e-17	3	948.1102	3	62946.8	53074.4	64860.4	43183.1	19374.7	37147.2	50248.5	30058.1	26067.7	68785	49277.4	29314.1
K.AGNTDSVPEFSLAEITFPVK.L	slr1031	1.22562e-20	2	1205.6423	13	90198.1	72458.8	156696	159518	51275	5653.29	98989.9	106906	48302	59849.9	63217.6	66288
K.AGPVVTDQGNLVIDVK.F	slr0194	1.74032e-20	2	957.0493	22	669376	545891	568454	399195	173729	278047	227587	146898	421349	573685	375080	327777
K.AGQDLAYTLTTPAIVDR.F	SLL0493	1.46134e-18	2	975.02594	9	123040	102823	232605	118975	91804	111072	245808	90359.1	200681	197933	185221	201759
K.AGQDLAYTLTTPAIVDRFK.L	SLL0493	3.13653e-17	3	790.10956	5	22662.4	14463.7	41924.8	16827	95103.7	140204	180053	113153	74182.7	89967.4	81793.9	76330.4
K.AGQFIGAIAK.I	sll0362	8.88343e-13	2	632.38495	2					64593.6	149915	153917	154805	116501	209781	168830	215245
K.AGQGGHIFNLGHGVLVGTPEDNVR.F	slr0536	1.19407e-16	3	863.45166	7	125176	86073.6	135828	147233	0	20589.2	20995.8	27563.2	144930	156725	153640	84270.8
K.AGQKQLPVWGDGSPTR.E	SLL1213	7.67039e-13	3	662.3641	1									16471.9	39180.8	103330	45598.6
K.AGQLTEGEVEIVLSEK.K	SLR0374	4.02941e-19	2	995.5513	4	160337	143759	160160	177950	14695	36353.3	23036	26174.1
K.AGQLTEGEVEIVLSEKK.Q	SLR0374	4.75371e-21	3	754.7671	8	319836	307808	179631	298336	88828.5	214890	117205	167639	134731	220917	89363.3	87315.2
K.AGQQAALVKEDGSIAK.G	SLR1105	5.3341e-20	2	1009.5815	7	17022.4	30469.4	28712.6	34386.5	575625	1.00171e+06	742728	1.02775e+06	1.69502e+06	2.13809e+06	1.90096e+06	3.03648e+06
K.AGQQQM*PIPSDGYLIIDR.G	SLR0280	3.14004e-16	2	1081.5547	2	16682.1	10610.3	32576.8	17419.4	11371.7	9804.48	17975.6	10012.8
K.AGQQQMPIPSDGYLIIDR.G	SLR0280	1.06676e-21	2	1073.5582	4	22591.8	25366.6	44235.8	16924.5	36508.8	34477.6	54250.6	23400.4
K.AGQSDDLNDTLNYADAVAIVQK.L	SLR1626	5.20926e-23	2	1305.1698	6	47618.4	13476.2	22768.7	18295.4	14700.7	14890.5	16576.2	7389.65	21422	14438.3	9473.03	6611.61
K.AGQVTILGGGVVGTEAAK.M	SLL1682	1.62018e-14	2	958.5585	1									23267	24235.3	32388.9	23898.9
K.AGQWLLDK.Q	slr2089	3.49462e-11	2	609.86194	2					242339	234770	259508	185154	326596	109697	126323	136282
K.AGQYVEPSLAEANK.A	SLR1247	1.51575e-18	2	882.9718	9	176418	205832	137484	402415	508420	482517	510166	1.24589e+06
K.AGQYVEPSLAEANKAISGAK.F	SLR1247	1.81714e-23	3	812.7859	2					14766.7	26327.3	25836.4	129485	18126.6	18699.3	61881	63486.3
K.AGSGGGSSAAPTATPAPQQP.E	SLL1841	5.46402e-10	2	927.45996	1									0	163.08	242.6	0
K.AGSGVATLGLPDSPGVPSNTTK.A	sll0017	6.16608e-20	2	1157.6279	31	52607.2	117448	284761	92204.9	58744	71764.8	495658	62905.4	1218.47	8133.3	34730.5	22182.5
K.AGSIVAISSISGER.G	slr1994	1.42917e-13	2	745.9183	2					108209	222737	228298	179177
K.AGSPVEIELTDAK.T	SLR1096	1.32735e-16	2	809.4499	12	2.64444e+06	3.82279e+06	3.74099e+06	3.41731e+06	2.16541e+06	3.3106e+06	4.55215e+06	2.27162e+06	1.39667e+06	1.94163e+06	1.45863e+06	1.82889e+06
K.AGSPVEIELTDAKTK.E	SLR1096	3.14856e-19	2	996.0721	1									6974.96	12258.4	38777.6	19261.5
K.AGSQLVFK.N	SLR0552	3.80793e-11	2	569.34503	1									139509	212571	181788	260311
K.AGSQLVFKNGLSIVAQPR.S	SLR0552	5.66112e-14	4	544.3192	14	747982	1.04771e+06	536208	1.30725e+06	214322	346136	139422	372562	200431	431351	177515	265394
K.AGTELAWLVDPMAK.S	SLL0007	9.50425e-19	2	895.4944	3	8171.05	1638	5254.54	4749.51	6115.61	6391.86	6476.15	3366.33	40590.4	23034.5	33570.8	24949.9
K.AGTIDGYCVSEPWNLR.A	slr0043	1.05273e-20	2	991.481	13	186691	190419	54611.2	165626	435482	545373	69248.3	397223	130418	94891.4	16025.1	105143
K.AGVAVTAINAETSNAEEIK.E	SLL1521	9.59447e-22	2	1088.5897	2	25404.2	10816.1	17045.7	15604.4					17567.8	13366.1	6259.61	11022.2
K.AGVAVTAINAETSNAEEIKEAIGK.S	SLL1521	1.24049e-24	3	940.1902	12	159123	211837	145866	178031	33045.5	90763.6	72793.9	80457.8	192037	209037	130669	187560
K.AGVIGFTK.T	SLR0886	4.68513e-11	2	540.8357	2					2640379	4.51306e+06	5.06136e+06	4.92608e+06
K.AGVIGM*M*K.S	slr1994	2.76054e-11	2	563.8141	1					2876.65	3845.28	7479.58	4478.89
K.AGVIGMMK.S	slr1994	8.39068e-12	1	1094.6287	2					13811.6	27439	31020.6	18021
K.AGVQDYR.L	slr0009	1.60187e-10	2	476.75266	19	26066.8	48042.8	36176.5	31139.8	33444.4	29435.7	63618.7	44239.8	30942.2	33975.9	62870.4	55336.7
K.AGVSISVDDLTIPPEKK.Q	sll1789	3.63395e-17	2	1101.1395	18	273809	292994	223879	298993	145229	169085	201949	215682	183816	284901	296679	197962
K.AGWILDGFPR.N	SLL1815	1.06865e-13	2	638.35315	6	1.29767e+06	975137	1.94988e+06	1.7742e+06	1.31134e+06	1.43388e+06	1.99128e+06	1.90397e+06	1.57995e+06	1.80027e+06	3153594	1.74889e+06
K.AGWM*GGKPVPGYREEPGVDPSSTTPTFAALK.L	slr1843	3.56278e-18	4	913.7245	2					12092.6	11974.7	23919.9	15837.8	22453.3	24074.4	16780.5	20385.5
K.AGWMGGKPVPGYREEPGVDPSSTTPTFAALK.L	slr1843	3.39521e-16	4	909.7261	2	12005.6	22021.6	17694.5	21737.1	14998.3	15745.8	18263.6	16209.7
K.AGYGAEEIFEQSGFQK.V	SLL0102	3.86209e-21	2	1024.5101	10	257282	312961	435603	289406	168159	282369	305025	185636	264647	349941	296598	268680
K.AGYLFPEIAR.R	SLL0480	2.81042e-13	2	640.8601	15	4.47624e+06	4.65199e+06	3.5324e+06	6.32771e+06	1.28244e+06	1.48375e+06	1.41419e+06	2.08975e+06	1.5487e+06	1.9054e+06	1.2815e+06	2.06291e+06
K.AHADVVLVSGYDGGTGASPQTSIK.H	sll1502	2.82764e-24	3	873.4594	8	78220	94334.9	63302.8	85652.3	15062	25106.6	7024.87	18534.5	95000.7	129400	59336.4	74039.9
K.AHFRPDEVTLIED.-	ssr0330	5.90721e-10	2	843.4343	1					277168	60095.6	163467	320853
K.AHGGALM*IVDAVTSLGATPVAIDDLGLDVVASGSQK.G	SLL1559	4.61224e-11	4	939.0081	1	3503.24	0	0	0
K.AHGGALMIVDAVTSLGATPVAIDDLGLDVVASGSQK.G	SLL1559	1.44427e-21	3	1246.3441	4	3345.17	0	0	0
K.AHHGDFEAENVELITK.E	SLL0149	5.10086e-13	3	700.03064	3	22019.6	23794.7	16256.8	17292.6	27288.6	47170.8	24447.5	39624.7	17156.4	29791.6	17180	17332.6
K.AHILEANQDNNKLVLTQR.R	slr1984	1.92708e-20	2	1183.1615	13	341135	938527	373880	873995	72095.8	148998	121735	182978	9305.56	17923.2	14503.2	23062.5
K.AHPDIFNM*LLQILEDGR.L	sll0020	5.80447e-16	3	714.7123	2	6190	1942.69	1968.12	1596.1	7285.64	2296.99	1925.81	1912.5
K.AHTLVNLPEADFITELR.Q	SLR1300	4.53016e-15	3	695.0495	1									18469.5	18872.4	16290.6	13683.1
K.AIAADAPAELAMAQGSNINPER.I	sll0813	1.09539e-18	2	1177.5958	3					25535.7	39512.7	34707.7	37172.9	0	4100.27	2996.66	4078.45
K.AIAAKDEAK.V	SLL0245	2.20397e-11	3	450.27692	1									745.72	925.16	2010.18	3381.32
K.AIAAQLLLPHDQGEKVS.-	slr5058	1.2025e-13	3	693.39886	1					23053.9	33454.6	55269.5	32089.7
K.AIADGEEIYQETR.L	SLL1435	7.91541e-17	2	819.9067	7	134559	309037	244276	218620	3.11066e+06	5.81855e+06	6.81511e+06	4953114	1.1114e+06	1.80905e+06	2.33031e+06	2.24239e+06
K.AIADIEAAYGAGIR.D	SLR0556	4.81799e-15	2	767.9209	1									74517.9	103827	38201.8	49728.3
K.AIADIEAAYGAGIRDFAESR.I	SLR0556	4.92017e-15	2	1120.576	11	101254	226144	396337	420561	113778	204462	300444	306905	168573	394735	615173	256520
K.AIADIFAEDGEDTFRDLETEVLGHLAAQTR.S	sll1669	7.13081e-28	4	862.6879	7	57538.8	0	0	963.96	58391.4	3461.06	0	5621.07	91239.2	1605.21	7802.14	992.03
K.AIADPPGFQGTLRPYQAR.G	SLL1366	3.41015e-10	3	701.379	1					70166.2	100932	134758	87710.5
K.AIADTPDEPEYVDIGFEK.G	slr0585	2.34266e-22	2	1149.0746	24	459841	719547	461964	933842	96219.1	127885	181495	152678	97964.9	153625	111541	199163
K.AIAEARPEIVFHLAAQPLVR.R	slr0984	7.47999e-16	3	782.4595	2					35930.9	41309.6	31473.7	51195.9
K.AIAEGADYIGVGPVYATPTK.A	sll0635	2.09599e-21	2	1141.1179	6	3767.5	16093.4	14527.4	8224.83	31919.1	41744.5	47355.2	23958.2	6441.64	14622.4	21832.2	16262.9
K.AIAEM*AGSESIK.L	sll1837	1.39831e-15	2	755.90326	9	9519.12	4762.67	9815.22	8856.02	178270	112530	342693	188910	696737	763213	863527	982290
K.AIAEMAGSESIK.L	sll1837	1.39831e-15	2	747.9056	4	0	0	0	0	0	0	0	0	124778	294674	136170	151900
K.AIAENVGVFFPNQEGR.G	slr1295	6.08745e-20	3	631.3318	39	1.95697e+06	3.61475e+06	1.02474e+07	2.89792e+06	1.19245e+06	3.34361e+06	1.368e+07	2.71792e+06	1.66357e+06	5.32546e+06	1.62241e+07	3.58733e+06
K.AIAEQSGVK.T	SLR0537	4.85725e-12	2	595.8521	3	5189.6	4860.13	3879.16	4039.19					2346.73	840.68	3181.88	2877.28
K.AIAEVMVQNLEGSRR.Q	XXX_SLR1474	8.78173e-10	2	908.9951	1					31970.5	27821	31989.4	19592.2
K.AIAEWGTGSTGSR.L	slr0917	2.17024e-11	2	718.86615	1									29597	44371.1	38741.5	48035.5
K.AIAGGFLVQSADDEREDPSTWQVVTEK.Q	slr0597	1.20963e-25	3	1079.5498	6	122446	71608.4	133053	70711.6	9583.9	4440.87	5518.05	4721.11	65439.4	31498.8	20961.2	22209.8
K.AIAGGKNQEALQQLTQYLEK.S	SLL0606	7.96787e-19	3	879.164	2					8620.32	20777.7	28351.6	22163.2	10336.8	31878.5	22763.1	20758
K.AIAGLDYFGQDEDTIASVVGALLR.E	SLR0427	2.34602e-26	2	1319.704	5	19376.2	0	0	0	7663.71	1302.18	0	1171.04	18846.8	1902.56	2553.78	1211.11
K.AIAIEEGASILQAAK.E	sll1223	1.45323e-17	2	887.0222	12	255509	260584	550103	406490	49906.1	126918	175882	92048	241192	362834	421567	380286
K.AIAITSCGQEVTVIGAEK.T	SLL1376	1.15153e-22	2	1068.0834	2	16518.8	7896.74	20257	20008.8	7451.37	15605.8	23106	24964.4
K.AIAIYRDQDGQVR.A	SLL1869	4.49383e-14	3	550.3001	3					88262.1	159154	198947	136365	46375.6	41142.2	42378.6	33345
K.AIALEELK.I	SLL1252	5.88105e-10	2	587.86786	4					160313	388741	627360	273749	79542.6	130814	242722	159437
K.AIALESVAGAYWR.G	sll0078	6.87843e-14	2	775.92664	2	257951	181070	198632	246012
K.AIALGATLVGSAAPVLAEAK.I	SLL1556	2.4668e-20	2	1056.1392	9	51455.1	31579.3	52739.4	35808	55469.9	44280.2	29664.1	36184.4	27503.6	25367.7	50097.9	21965.6
K.AIALGYVPTELAK.V	SLL0171	3.19161e-16	2	817.49255	6	163091	304938	351005	242565	159997	277268	381144	270703	268799	622127	491109	473386
K.AIALKQEVDK.A	SLL0542	4.36027e-13	2	773.9752	2	72733.5	157466	57713.5	90583.4	84045.1	239301	82935.2	73628.4
K.AIALQAYNNVLR.R	SLR1975	4.72889e-12	2	745.4341	1									93880.7	91990.6	96576.8	131017
K.AIALVEPIDRR.L	slr0083	8.20863e-12	2	698.92224	2									98792.3	177198	178701	152891
K.AIAM*DNALVVNLMR.H	SLR0626	3.15451e-15	2	845.9592	1					19287.6	26069.7	19208.1	19585.1
K.AIAPEGDKR.L	SLR0453	2.942e-12	3	415.57877	4	441.88	1270.42	610.19	845.61	1820.7	1572.64	3184.49	5395.59	989.93	1549.3	5135.64	6933.56
K.AIAPHLSLTDNK.S	slr5024	4.3683e-14	3	523.3052	1									105467	126573	116742	128705
K.AIAPLPENTIVAVNADDPTLSHLGQK.L	SLR0938	4.22348e-29	3	991.5469	13	367781	219688	332062	259988	47589.2	148249	184253	98443.4	20841.9	32298.8	34668.7	34692.5
K.AIAPVFGGVNLEDIAAPR.C	SLR0721	3.93137e-22	2	977.5496	12	86366.2	115740	199530	150016	272946	714191	1.27624e+06	586617	46131.7	84954.9	114914	72739.2
K.AIAQVGAISAGNDEEVGQM*IANAM*DK.V	slr2076	5.16708e-20	3	975.14905	4	21618	5489.35	16420.1	13420.4	5863.93	7112.21	15907	8771.77	6505.74	9682.17	9420.21	13190.5
K.AIAQVGAISAGNDEEVGQM*IANAM*DKVGQEGVISLEEGK.S	slr2076	1.27226e-13	5	879.65295	1									2554.97	1168.74	1187.43	665.74
K.AIAQVGAISAGNDEEVGQM*IANAMDK.V	slr2076	1.4132e-21	3	969.8209	11	121556	53588.5	82910.2	66298.1	39666.6	52002.3	49757.3	25738.9	24814.7	37415.7	16321.2	29860.1
K.AIAQVGAISAGNDEEVGQM*IANAMDKVGQEGVISLEEGK.S	slr2076	1.77664e-22	4	1095.0632	34	30505	18714.9	9356.09	9786.64	21681.1	20093.1	15550.7	10691.9	7555.32	5014.46	9175.48	4569.43
K.AIAQVGAISAGNDEEVGQMIANAM*DK.V	slr2076	8.65133e-22	3	969.8193	10	73669.7	47774.1	74269.5	48600.1	15525.3	28391.2	44959.6	24136.1	7635.86	12955	26621.2	18039.1
K.AIAQVGAISAGNDEEVGQMIANAM*DKVGQEGVISLEEGK.S	slr2076	1.1259e-16	4	1095.0623	5	13725.7	0	0	0	0	15155.6	0	0	0	4563.29	0	0
K.AIAQVGAISAGNDEEVGQMIANAMDK.V	slr2076	5.76696e-28	2	1446.2317	22	90778	46681	71792.3	37074.2	119850	147768	132480	65170.4	10394.9	9225.6	6525.99	4400.6
K.AIAQVGAISAGNDEEVGQMIANAMDKVGQEGVISLEEGK.S	slr2076	1.94939e-25	4	1091.0659	51	13466.9	6005.77	7004.41	9105.43	29260.3	31230.1	1848.31	28339.1	34661.2	17573.4	14280.2	23914.1
K.AIASEGSFKR.A	sll0998	4.27111e-13	3	451.92953	6	10763.4	35914.7	28569.1	35480.4	19480.8	55087.2	67253.9	69954.5	74235.7	155189	184669	196759
K.AIASLVHSNTLDSEHIIPSVFDNR.V	SLR0721	6.83625e-20	3	927.15515	6	119688	65286.9	113963	113598	10427.9	19350.3	12026.8	17017.8	57688.5	48820.2	64999.4	29482.4
K.AIATELVAQSAR.I	SLL1329	1.37307e-14	2	687.3972	3	46583.1	56566.4	121029	74893.7	190770	422881	888590	437919	73317.3	101287	209139	109733
K.AIATYSHGPLLPK.N	SLR1742	4.67254e-15	3	552.6618	1									46564.4	79239.2	102833	72735.2
K.AIAVNPEQNLLTTAEGR.Q	SLR1591	3.92732e-21	2	971.02905	4	27119.3	30932.4	64966.3	37479.3	6673.2	12482.4	29194.3	0	1654.82	3172.49	8880.19	3595.11
K.AIAVQANVAK.K	sll5079	3.48415e-13	2	636.89685	7	149033	176912	394396	249439	17948.8	32954.2	39902.3	34497.2	37083.7	56450.4	85747.5	59270.6
K.AIAYEATK.S	SLR1223	4.16968e-11	2	577.83527	2	14403	31066.8	32192.3	19356.4					36885.7	59875.6	84660.9	56646.8
K.AIAYPDFSQRPVSKPK.E	SLL0602	2.11526e-14	4	559.8255	1	90950.6	89108.1	76826.7	78078.9
K.AIDAFTLGK.H	SLR1107	7.24074e-12	2	612.36066	1					32059	66467.5	68955.8	35373.8
K.AIDAGDYNYAIAFQER.I	sll1091	6.61001e-21	2	980.98065	20	269008	274373	382742	341275	105185	231729	203178	171111	122705	187668	171372	136328
K.AIDDM*GDR.Q	SLL0480	4.00747e-11	2	526.74475	1					1198.84	721.82	1282.27	1135.43
K.AIDDM*GDRQTFK.G	SLL0480	5.4424e-16	3	567.6207	4					52393.2	72077.4	127603	207420	12511.8	40375.3	47788.4	53207.9
K.AIDDMGDRQTFK.G	SLL0480	6.98748e-17	2	842.93085	3					51148.1	150681	224374	574403	140136	423404	574967	525745
K.AIDDMGDRQTFKGYGPEQGYAWLR.E	SLL0480	1.57047e-17	4	766.38025	1					17692.1	34389.7	31393.4	77748
K.AIDFVAAGK.V	SLR0076	4.13162e-12	2	590.3512	3					167278	220094	185635	132035	1139.51	1099.45	1515.85	978.28
K.AIDISQNLANQTPDGR.V	SLL1343	3.73432e-19	2	928.98334	10	162796	269791	218814	162014	108443	127110	249284	165682	14801.6	27958.1	38246.2	36799.5
K.AIDLIDEAGSR.V	sll0020	1.24367e-13	2	652.35376	5	1.68805e+06	1.5689e+06	1.33249e+06	950196	2.22878e+06	3.30149e+06	2.46746e+06	1.48715e+06	126094	133117	56419.3	62230.1
K.AIDLVDEAAAK.L	SLR1641	6.42645e-14	2	702.4028	3	1.21885e+06	901917	678314	909674	115219	157011	120499	87958.9
K.AIDLVDEAAAR.L	slr0156	2.05023e-12	2	644.35474	1	102177	86908.7	99023.8	82197.4
K.AIDM*GVTTAEM*K.G	sll5066	8.87959e-17	2	793.90344	2					6029.75	4167.02	11982.3	6697.11	8646.33	9380.74	11955.4	10318.2
K.AIDMGVTTAEMK.G	sll5066	8.87959e-17	2	777.90826	3	3921.84	7349.56	5414.46	6094.24	64444.6	135193	101756	88454.2	62307.3	84003.8	142677	89210.1
K.AIEDAAKIPK.D	SLR1799	1.00674e-12	3	496.9771	1									23831	55845.3	67254.3	116873
K.AIEGEKEYK.D	sll1099	1.28564e-12	3	500.28598	9	57221.8	60078.9	35531.1	25732.7	30271.8	19678.7	22960.1	19958.5	104455	84253	62248.6	137479
K.AIEGEKEYKDAILELM*K.A	sll1099	7.76997e-18	3	858.1491	59	2.7117e+06	5.41574e+06	2.3637e+06	5.91857e+06	3.55026e+06	8.13245e+06	2.41675e+06	9837512	1.85864e+06	5.54023e+06	3.12105e+06	3.39446e+06
K.AIEGEKEYKDAILELMK.A	sll1099	1.20985e-18	3	852.8181	227	1.17863e+07	2.72367e+07	8.4902e+06	2.83507e+07	9.24211e+06	2.30642e+07	4.05494e+06	2.65241e+07	6.20707e+06	1.59842e+07	9.24977e+06	7.13887e+06
K.AIELENLAAK.V	slr2058	2.00845e-12	2	680.4072	1									916913	1.62165e+06	733046	2.21114e+06
K.AIESVENLPLDDQEILLDIIQK.R	SSL2920	1.38499e-22	2	1398.7808	11	31436.7	10241.2	40426.3	39707.6	12266.3	10639.9	14305.3	13496.7	11907.4	8394.47	13411.6	11716.8
K.AIESVENLPLDDQEILLDIIQKR.L	SSL2920	4.68678e-23	3	984.88837	4	48868	27781	21777.7	68532.7					18625.5	18713.4	46769.1	21823.5
K.AIETELLRR.E	SLL0441	2.53935e-10	3	415.58588	1					29082.5	88748.8	78522.6	100121
K.AIEVNVGR.T	sll1209	5.6404e-11	2	501.79672	1					51397.6	70458.9	135823	101771
K.AIEYEIER.Q	SLL1435	8.42503e-11	2	583.81195	5					165867	276499	333048	214995	101353	153647	198001	130273
K.AIEYM*HRR.L	slr0335	6.97259e-11	3	412.55295	2	3369.55	5251.84	303.98	2825.31	4259.53	8600.61	556.09	2983.46
K.AIEYMHRR.L	slr0335	2.43558e-12	2	610.32764	2	38743.3	74617	9924.82	48101.7
K.AIGAEFQVPSQLVDLLR.I	SLL1730	2.06566e-20	2	1000.5718	6	6010.94	0	3992.33	0	32952.5	28220.8	27029.5	19731.4	57997.9	30575.9	56523.9	41632.1
K.AIGAQVNQGGRPEK.Q	SLR1533	1.28861e-16	2	856.98535	6	1302.09	930.55	1240.01	648.56	34154.9	44146.7	39292.4	19992.9	32433.9	16187.8	20571.2	17744.7
K.AIGATVSECIVATGEDPQKVK.E	SLL0498	1.01422e-13	3	869.48	1					19578	25364.4	19070.7	19413.2
K.AIGEAFKK.Y	sll1549	3.91645e-11	3	432.60593	1					28796.1	53816.4	187776	26415
K.AIGLSDNEILDSLSHPEFYQK.T	sll1787	1.23982e-25	3	888.7988	26	390447	302942	363885	403907	218610	266377	224618	199887	434022	305191	259128	344494
K.AIGTVDVPQEAFM*AVLK.L	SLR0604	1.19708e-21	2	1047.082	8	87133.6	98077.3	71202.8	81646.5	20088.7	40428.7	31058.3	29512.7	36156.1	34828.7	35490.7	38590.4
K.AIGTVDVPQEAFMAVLK.L	SLR0604	5.93286e-22	2	1039.083	7	262546	70793.1	44323.9	59576.8	25694.7	62618.7	31102.8	33834.9	70391.5	117764	33672	63528.3
K.AIGTVDVPQEAFMAVLKLDPQ.-	SLR0604	1.28454e-10	3	844.1333	1									5596.27	11348.7	13949	6662.81
K.AIGVPLYEQIGR.K	sll0030	2.82883e-10	2	730.42126	1	9428.31	22215	19501.9	23171.1
K.AIIEAHNSLSNANR.T	SLL1021	4.2073e-18	3	551.9652	2	15855.4	45304.1	17496.6	31386.1	133099	408576	228832	328677
K.AIIHSDGVAISYQHDGENQVER.K	SLL0659	1.00846e-17	3	861.42865	2	28678.9	50903.9	41053.9	42043.1
K.AIILVEQNAK.Q	slr1881	1.51151e-12	2	693.93097	1									338305	453632	589404	331579
K.AIIPYFR.F	SLL1033	7.51104e-10	2	512.30896	2	140580	154859	184079	171055	42277	135733	118875	71349.2
K.AIKEATGKDDAEAIK.K	sll1746	7.95956e-18	4	534.813	16	33217.2	141261	40971.9	123246	500638	1.01808e+06	754686	1.64868e+06	249267	806387	829265	827042
K.AIKEATGKDDAEAIKK.Q	sll1746	5.53808e-15	4	602.862	6	9208.99	30959.3	8462.7	20006	77936.7	166873	104272	327325
K.AIKEVTWIPTQGENR.I	sll1362	3.01355e-15	2	1015.56616	2					57516.7	61982.9	40967.1	93284	3517.21	14343.3	30908.4	16629.3
K.AIKNLTPLVEVK.A	sll1097	1.21347e-13	2	879.0666	4	19441.4	26330.3	31834.8	40693.6	25181.6	29381.8	36867.9	34090.2	52636.3	95811	420113	239890
K.AILAGELDDLPEQAFYLVGDIEEAK.A	slr1329	1.73256e-27	2	1504.2976	28	2542.19	0	0	0	3386.48	2865.34	0	2140.08	17898.6	12676.5	10999.5	8116.49
K.AILAGELDDLPEQAFYLVGDIEEAKAK.G	slr1329	2.24098e-30	3	1117.6108	4	2080.6	5404.92	0	9841.78	889.14	0	0	8802.65
K.AILANWSDYLGK.F	sll1499	6.40346e-16	2	819.96106	5	46343.2	23124.2	24335.1	30417.5	243672	177763	149443	180528	78786.5	49422	35156	45960.3
K.AILAQPAGTVDGR.I	sll0920	3.89977e-14	2	706.9035	6					70997.7	138454	252788	128171	113353	268877	498806	315211
K.AILDFQPGATIVEVK.D	SLL0224	1.26024e-18	2	945.0539	5	251899	121637	188260	179663	48451.6	52178.9	56438.4	36215.9	256953	177711	167270	184665
K.AILDFQPGATIVEVKDQADGM*AK.L	SLL0224	7.05085e-15	3	955.8532	5	60830.5	56897.7	84042.2	115841	29221.2	26437	31271.3	42813.5	40546.5	43937.7	92756.8	45486.1
K.AILDFQPGATIVEVKDQADGMAK.L	SLL0224	9.00353e-22	3	950.51965	10	142862	143087	162913	244927	84321.8	104613	90143.8	115150	70452.6	114340	77499.6	103065
K.AILDKTPGPNFISAK.D	sll1027	3.41924e-19	3	668.7321	10	23028.8	48635.7	34215.7	53470.1	18198.9	44181.1	44010.6	48868.4	1.25018e+06	2.41367e+06	2.01499e+06	2.06749e+06
K.AILPSYNGTLLDIHDKGDIK.T	SLR0913	3.35489e-16	3	872.82434	1									51653.6	90859.2	13511.5	57222.1
K.AILSTLQNESGPIALEALATK.V	SLR1349	3.96276e-24	2	1214.6993	29	130076	75169.6	370319	125235	54721.7	63836.8	44472.2	26340	76698.8	49588.4	30876.8	220258
K.AILSTLQNESGPIALEALATKVQAPEQVETVYK.I	SLR1349	2.09401e-17	3	1315.4031	6	13571.5	9917.35	17824.5	34546.8					0	1897.2	9199.06	6363.47
K.AIM*PVHLFGQPAAM*AQIK.A	SLR1666	2.55399e-21	3	748.41376	2					60382.3	83798.3	98504.6	90651	33548.8	26178.5	29241.4	56707.8
K.AIM*PVHLFGQPAAMAQIK.A	SLR1666	3.22445e-18	3	743.08246	2									52630.6	62156.7	69291.2	63300.7
K.AIM*QALPAR.L	SLL1043	5.69081e-12	2	565.8268	2					19739.2	25786.6	25682.5	22931.2	22523.3	28814.7	26698.4	23348.2
K.AIMPVHLFGQPAAM*AQIK.A	SLR1666	1.19124e-16	3	743.0822	2					75485.4	104453	80296.9	106446
K.AIMPVHLFGQPAAMAQIK.A	SLR1666	1.25304e-23	3	737.75183	2									54122	61261.2	61198.9	53760.5
K.AIMQALPAR.L	SLL1043	4.88763e-12	2	557.8285	4					517079	699501	494993	336881	1.64171e+06	1.24443e+06	2.63123e+06	1.40527e+06
K.AINESDM*CM*VPDPN.T	slr1756	1.10744e-11	2	884.87006	1	725.92	2319.88	1227.11	1397.08
K.AINESDM*CM*VPDPNTATIDPFCK.E	slr1756	2.37696e-18	3	982.77844	1					0	8746.7	19986.8	8318.25
K.AINESDM*CM*VPDPNTATIDPFCKEPTLSM*ICSIKEPR.T	slr1756	6.02668e-13	5	950.4539	4	0	0	6496.29	0	4447.19	6476.08	4600.58	3325.61	3208.94	0	0	0
K.AINESDM*CM*VPDPNTATIDPFCKEPTLSMICSIKEPR.T	slr1756	3.29681e-15	4	1183.8192	8	7726.06	6574.05	18079.2	8970.66	0	0	0	0	0	3880.01	3301.4	0
K.AINESDM*CMVPDPNTATIDPFCK.E	slr1756	5.26518e-15	3	977.4475	2	0	0	5411.86	0					0	21619.7	19650.6	13791.6
K.AINESDM*CMVPDPNTATIDPFCKEPTLSM*ICSIKEPR.T	slr1756	3.30121e-10	4	1183.8157	1									0	0	0	0
K.AINESDM*CMVPDPNTATIDPFCKEPTLSMICSIKEPR.T	slr1756	4.59104e-14	4	1179.8165	4					0	0	0	0	0	0	5480.71	0
K.AINESDMCM*VPDPNTATIDPFCK.E	slr1756	2.17423e-21	3	977.4469	5	49945.8	29479.5	19590.1	53506.3	8093.25	26886	20477.4	14216	18605.2	29192.9	28982	21450.7
K.AINESDMCM*VPDPNTATIDPFCKEPTLSM*ICSIKEPR.T	slr1756	1.58356e-11	4	1183.5659	2					0	0	0	0
K.AINESDMCM*VPDPNTATIDPFCKEPTLSMICSIKEPR.T	slr1756	4.21125e-17	4	1179.8165	16	0	5283.19	0	0	0	0	11566.9	5728.68	0	11692.3	2812.43	20664
K.AINESDMCMVPDPNTATIDPFCK.E	slr1756	4.96726e-18	3	972.11755	6	19039.2	13626.9	17064.8	9136.08	0	0	2340.31	0	18139.3	13661.2	16834.4	13455.5
K.AINESDMCMVPDPNTATIDPFCKEPTLSM*ICSIKEPR.T	slr1756	1.32871e-15	4	1179.8187	11	0	3632.08	1875.22	0	0	2095.87	1194.29	6987.51	0	0	13592.6	0
K.AINESDMCMVPDPNTATIDPFCKEPTLSMICSIK.E	slr1756	4.6999e-14	3	1440.0264	5	0	0	1079.3	0	0	0	2917.45	0	0	0	4747.48	0
K.AINESDMCMVPDPNTATIDPFCKEPTLSMICSIKEPR.T	slr1756	1.02546e-17	4	1175.8197	13	0	4663.74	1840.49	0	0	0	0	0	0	0	2565.43	0
K.AINLDQVGK.V	SLR1307	6.57466e-12	2	623.3734	2					101034	85795.6	315473	95231.7	107587	147504	234976	166696
K.AINQIVQLPNELLEYSVTSVTEGIDALGK.V	slr0186	4.88679e-12	4	851.47406	1	0	0	0	0
K.AIPDEDVLAFAVAEQR.A	sll7033	4.88926e-20	2	944.50104	4	49691.4	30946.7	43492	41543.3	81057.3	111524	93189.6	96046.1
K.AIPITVDAK.T	sll0373	8.26247e-12	2	608.3812	6					838991	2.2776e+06	2.82466e+06	2.33505e+06	291863	678266	773486	867835
K.AIPLVLM*SGR.K	SLR2024	6.32893e-13	2	608.8639	2					522941	1.14715e+06	1.20293e+06	743198
K.AIPLVLMSGR.K	SLR2024	6.32893e-13	2	600.86694	6	393762	340945	472332	327800	66717.4	161393	146735	90349.3	67745.6	90748.1	81450.6	58804.4
K.AIQAEQDAEQER.L	SLR1612	9.72631e-16	2	766.3779	6	8762.64	10061.4	7202.83	8710.6	45043.3	41133.8	67758.2	75730.4	5960.6	6528.96	6922.86	13479.2
K.AIQAEQDAEQERLK.A	SLR1612	5.45775e-14	2	959.01575	1									0	0	22512.1	20827.3
K.AIQAQGIDATHLVEVGVQCSLR.Q	SLL0005	5.63207e-20	3	837.1161	1	19418	9228.98	12278.9	12551.8
K.AIQAQQDAEQAK.A	SLR1612	1.02855e-15	2	794.9305	7	2317.87	2379.64	1948.77	2877.6	7840.66	6365.92	11995	8425.27	15618.2	13462.1	14971.5	26994
K.AIQAQQDAEQAKAELQK.L	SLR1612	2.22941e-21	2	1151.6392	3	11597.9	31663.6	36042.8	74919.4	6297.12	9874.41	9270.63	19591.6	9403.55	19234.9	18657.1	36917.6
K.AIQAQQDAEQER.L	SLR1612	8.82525e-16	2	765.88617	6	2717.14	3542.68	2400.89	2865.59	10299	6198.42	14169.6	15376.9	2259.39	2559.76	2160.58	5550.8
K.AIQAQQDAEQERLK.A	SLR1612	6.75354e-18	2	958.5236	7	2802.18	7927.15	3189.57	12893.5	60616.7	89138.8	205628	612603	61864.5	106658	126190	140597
K.AIQDCSNAIEINPNYADFYVYR.G	sll1667	3.39062e-21	2	1390.6584	4	16077.8	6878.21	1888.24	12274.4	4494.88	23136.4	27421	7073.95
K.AIQQLLDQGLAYR.C	sll0179	6.08324e-16	2	816.9642	4	89617.3	32654.6	77597	84170.2	30901.2	28685.1	45311.1	40732.7
K.AIRVPGGNETISNVR.I	slr1720	2.72454e-16	3	575.9928	2					241560	714994	1.55156e+06	1.64618e+06	248873	357757	781050	620985
K.AISETQIELVHPDNDELK.H	SLL1109	8.26632e-20	3	780.4159	9	92078.6	30712.2	39515.5	23379.6	383257	557019	291355	199634	187204	160312	91644.3	119701
K.AISGVDFLVR.E	SLR1067	4.76047e-13	2	610.86	4	164516	200508	146522	298143	104583	193081	143415	206470	95130.3	124608	78409.7	139140
K.AISLSDLGLTPNNDGK.V	sll0145	1.20023e-19	2	952.02216	19	503482	519590	916783	565731	1.32153e+06	1.35134e+06	4.98158e+06	1.99237e+06	844301	2.00798e+06	3.65371e+06	2.24143e+06
K.AISLSDLGLTPNNDGKVIR.L	sll0145	5.49855e-16	3	757.76904	5	20868.2	35365.9	28179.3	52723.6	27131.4	43555.6	65939.3	70976.8	12004.1	63779.2	520433	86724.9
K.AISPNPSFIADENLPR.Y	SLR0082	2.11084e-20	2	943.00006	9	145139	157512	122633	231428	72132.3	71721.8	114857	118772	59291.7	60139.2	73458.2	123655
K.AISSANDPQAVYQTLLAADALR.Y	SLL0529	3.49043e-24	2	1216.6527	42	188617	233294	132425	334272	173697	268942	119938	214828	52307.3	110672	29137.3	84804.4
K.AITETLLTFTGVPHRLEPICTINGVQFINDSK.A	sll2010	3.05348e-13	4	969.0221	1					22987.5	12464.6	6520.14	12422.4
K.AITLGIDRDLIAK.Q	SLR1740	2.56481e-15	2	844.0217	8	264528	300679	243300	343405	157422	319284	193068	263420	167452	285546	142903	184548
K.AITQEYEQQITDAR.R	sll1323	2.97835e-18	2	905.4575	16	44888	181831	199523	158168	65110.9	3.52835e+06	3.02598e+06	2.0238e+06	180361	2.70864e+06	2.93404e+06	2.05368e+06
K.AITQEYEQQITDARR.Q	sll1323	2.32223e-16	3	656.0083	7	20816	5.69047e+06	3.70295e+06	4.71264e+06	11457.4	1.08017e+06	2.49041e+06	2.33605e+06	0	42075.2	63383.2	51064
K.AITVRPTPPLSPR.L	SLR1913	3.00232e-13	3	516.9823	1					47715.1	123447	164440	126178
K.AIVDKVNR.E	sll1450	4.52689e-11	3	401.58563	1									6244.83	15431.2	29801.9	11361.8
K.AIVDKVNREDLWR.E	sll1450	2.21881e-15	4	476.27533	11	60243.2	598126	1.14886e+06	525443	406318	1.26244e+06	1.91854e+06	1.23302e+06	68397.7	648654	1.65413e+06	276054
K.AIVEEHINLVGLGHAVDK.R	slr0043	2.61349e-20	3	734.7556	1	62847.6	25079.7	28441.3	23517.9
K.AIVGANAFAHESGIHQDGVLK.N	slr0186	2.46495e-25	3	808.10767	12	649132	840135	779538	1.1397e+06	142048	242850	240318	265674	40447.5	59702.4	42335.8	66488.3
K.AIVGKDIYDRK.A	SLR0237	1.29462e-12	3	570.67926	1									87471.5	204074	315882	203042
K.AIVTSLQGK.H	SLL1825	9.20133e-12	1	1204.7454	4					1.84413e+06	4.66882e+06	5.04989e+06	1.31369e+06	397925	715528	504419	490281
K.AIVTSLQGKHEVLQASR.Q	SLL1825	1.8545e-21	2	1063.118	5					5350.57	30256.1	25667	18318.6	71928.9	234958	149451	112787
K.AIVYPQVLK.L	SLR1927	5.15923e-12	2	659.92017	1					63091.3	79232.5	207370	78991
K.AIYDTLIQVCEDPEWVVR.Y	sll1051	1.05244e-15	2	1175.5989	4	22858.6	3286.15	11088.1	17957	5837.52	6209	5155.65	7507.64	9482.53	2464.1	11120.4	3395.54
K.AIYQQQFEQLK.A	SLR1959	7.26182e-15	2	842.46826	1	80413.4	155299	141998	184082
K.AKAELNLAMAR.F	SLL1481	2.32601e-12	3	492.62482	1					57518.7	91954.9	96227	100143
K.AKDEAGENASIKDIVR.L	SLR1793	1.44589e-17	3	716.7412	5					821510	478219	153833	224302	191976	53434.3	28077.2	32336.3
K.AKDGDSVGAATFQMENLLR.L	SLR0594	1.05912e-18	3	771.06934	3	20594.6	12780.2	20556.4	17151.9	21709.4	27498.1	26479	24631.8
K.AKDTISGAYPPIACR.N	SLL0188	4.46976e-18	3	636.6793	4					25553.7	52134.3	69049.9	43278.4	44555.7	99872.3	110597	65118.2
K.AKEAGQEDDAENLFDK.A	slr0823	1.85614e-17	2	1106.5559	5	86430.4	64311	33555.7	33765.3	257451	336792	97462.9	145321	28850.5	41822.8	0	23525.1
K.AKEAGQEDDAENLFDKAAEYWK.Q	slr0823	5.1119e-22	4	776.8959	11	33984.7	42375.7	19787.8	44107.5	189531	215618	74891.6	209232	84222.9	140617	27663.4	57118.8
K.AKEIM*LCPGSVPFVPPGIEIDHK.T	SLR1096	2.19302e-12	4	746.409	1					7013.64	12167.3	9357.99	9325.81
K.AKEIMLCPGSVPFVPPGIEIDHK.T	SLR1096	2.56325e-23	3	989.5454	2									55987.5	51065.6	36242	38925.5
K.AKELGVDTVLIDTAGR.L	slr1531	8.98299e-20	2	973.5609	9	98316.6	141954	132581	151709	20701.6	37366.7	35902.3	30684.6	91926.8	207862	390648	191787
K.AKENAPCLIFIDEIDAVGR.Q	slr0228	1.768e-16	3	807.1028	14									46187.5	11971.1	10449.7	33034.6
K.AKENAPCLVFIDEIDAVGR.Q	slr1390	2.12475e-17	3	802.4298	2	20737.8	0	16875.3	11589.8	25959.9	11181.9	7669.67	9922.01
K.AKENAPTLLSLTR.Q	SLL1070	1.79006e-16	3	568.0071	28	483287	691692	517929	575125	6.50757e+06	1.14975e+07	1.171e+07	1.10066e+07	5.43764e+06	8.78591e+06	1.04464e+07	7.69318e+06
K.AKEQLGESITK.K	SLL1712	2.2598e-14	2	818.48267	10	50389.9	48017.6	32461.9	40532.2	1.34309e+06	1.97295e+06	744321	1.00027e+06	724599	890401	421143	948227
K.AKEQLGESITKK.E	SLL1712	1.03697e-15	4	477.79385	8	14329.7	19647.8	5878.64	11649.2	214263	323909	112964	241162	284516	470929	147704	285220
K.AKEVAADLGIGDQFR.L	SLR1234	5.44384e-18	2	939.5213	6	22056.6	8763.28	9474.25	8963.76	185530	99383.4	46714.9	59531.7	125502	62764.3	45752	44754.1
K.AKGEPPSEVPEK.T	SLL1583	4.54399e-13	3	567.324	1					2120.91	2542.1	2970.56	2063.17
K.AKGEPPSEVPEKTK.A	SLL1583	7.89333e-16	4	519.0553	1									10298.4	36817.3	27135.4	28233.5
K.AKGGETLGEDYLPLGNTEVTPIITK.I	slr0447	2.03458e-22	3	1016.89813	51	98299.1	64113.9	491458	86412.6	10491.5	136550	277070	83582.9	8373.98	18622.7	179127	25460.2
K.AKICGYVTSTK.K	SLL0822	1.2763e-15	2	830.4759	1					16125.1	45616.5	70554.4	116090
K.AKIELSGVSQTEINLPFITATQDGPK.H	sll0170	2.18839e-19	3	1063.9293	6	9783.55	7353.1	5179.76	9598.18	7658.55	6561.96	2200.18	6083.15
K.AKNPDLWETMLTLCEK.H	slr0080	6.67775e-21	2	1191.1324	4	14090.7	20594.4	23559.1	14293.5	31042.9	30363.8	47784.5	31557	5689.63	4153.1	6729.33	2205.62
K.AKPEEIPDRVHQLQQELK.A	sll0362	1.35406e-10	4	648.37024	2					10679.5	17913.6	18688	12533	12292.8	29061.4	11857.3	10033.6
K.AKPPAVEEKPFTEFINQDFLPALQSALGK.I	sll0272	4.31229e-13	5	753.22314	6	62355.9	19122.1	35773.5	30007.8					25634.8	17346.9	14759.1	12487.2
K.AKPQILEPIM*AVDVFTPEDHM*GDVIGDLNR.R	slr1463	4.23588e-24	4	910.9714	13	54689.9	51549.4	58386.7	58102.5	35840.2	41810.7	19036.4	27643.3	30024	41525.9	46364.9	25035.5
K.AKPQILEPIM*AVDVFTPEDHM*GDVIGDLNRR.R	slr1463	6.87461e-16	4	949.9961	8	67574.4	26648.4	25765	31961.6	44780.1	45101.8	31695.1	40538.2	33717.7	11769.6	20717.1	18638.6
K.AKPQILEPIM*AVDVFTPEDHMGDVIGDLNR.R	slr1463	3.52836e-25	4	906.973	19	134454	67129.1	9333.71	45099.3	58801.4	56119.4	5678.65	49554.7	102583	38993.7	22145	3505.4
K.AKPQILEPIM*AVDVFTPEDHMGDVIGDLNRR.R	slr1463	6.41958e-21	5	757	3	15996	14699	7819.52	10344.9	27405.9	23306.6	5123.02	25255.9
K.AKPQILEPIMAVDVFTPEDHM*GDVIGDLNR.R	slr1463	3.21736e-20	4	906.9752	11	33204.4	0	0	3506.52	33693.2	31881.7	5444.84	7950.3	6529.66	20547.2	4921.55	2647.95
K.AKPQILEPIMAVDVFTPEDHM*GDVIGDLNRR.R	slr1463	2.65665e-18	5	756.99976	4					26857.3	42362.9	27735.7	36817.9	11366.2	17154.9	7080.7	6134.64
K.AKPQILEPIMAVDVFTPEDHMGDVIGDLNR.R	slr1463	1.76624e-26	4	902.97205	15	94275.9	43832	2968.71	25249.6	43479.6	52572.2	0	0	84070.7	47668.6	34480.5	7677.26
K.AKPQILEPIMAVDVFTPEDHMGDVIGDLNRR.R	slr1463	3.01257e-20	5	753.80273	5	23696.4	0	0	6606.84					29129.3	7663.6	6109.3	2882.78
K.AKSWDTCPTIDGGR.E	sll1031	1.9383e-16	2	926.4661	3					48074	75136.8	109076	98963.9	5777.34	24201.9	49643.7	18414
K.AKVDPSQVAFASGD.P	SLL1873	1.4116e-10	2	840.4443	4	73750.1	88468.8	45752	69323.6	19765.2	27019.8	24972	16275.1	5530.52	18819.4	8922.31	9946.42
K.AKVDPSQVAFASGDPIPQNVAR.R	SLL1873	6.27648e-19	3	852.4641	15	62074	262939	68979.6	199916	37562.9	96076	81316	61039.2	1567.54	2373.15	4554.22	1900.93
K.AKVEAM*SPEQAR.T	slr0162	3.01794e-14	3	540.9584	3					714.81	921.36	934.31	1289.3	442.03	868.35	740.47	1178.04
K.AKVEAMSPEQAR.T	slr0162	2.45033e-16	3	535.6268	3					14932	20556.2	18093	21271.1	7555.02	12486.4	12503.4	13211.1
K.AKVQLTVEQEGVVNGQK.L	SLR1301	2.00171e-10	3	754.09955	1									51014.7	64245.8	35855.3	42770.9
K.AKVSVDNNPVPTSFEK.W	slr1834	9.08115e-22	2	1082.6013	48	1.66308e+06	6.7051e+06	3.73788e+06	6.04838e+06	780408	1.08965e+06	1.37413e+06	1.79051e+06	867370	7.33917e+06	8.19331e+06	1.05655e+07
K.AKVYVEGDSTK.V	sll1463	3.0372e-15	3	543.64496	1	965.99	5351.69	1870.54	3503.28
K.AKYVEIINSSK.A	sll1326	8.7738e-15	2	842.5021	3					15057	94119.3	54855.1	105263	37580.4	93739.8	69219.8	73651.4
K.ALAALKDLSTSR.V	sll0672	6.42776e-15	3	511.97726	2	43656.6	169751	28281.7	156582	41369.6	100446	44725.9	107748
K.ALAANADLYVNDAFGTAHR.A	slr0394	1.29187e-24	3	712.03125	226	1.83378e+06	2.58697e+06	3.44107e+06	3.43325e+06	1.19505e+06	1.78866e+06	2.38625e+06	2.0548e+06	1.52706e+06	2.70208e+06	2.26771e+06	1.74113e+06
K.ALAAYFFGSEEAM*IR.L	sll0020	3.62123e-11	2	917.96106	1	11625.4	0	2541.26	4160.3
K.ALAAYFFGSEEAMIR.L	sll0020	4.42742e-14	3	607.31226	1	886.61	0	0	0
K.ALADIAKDLQPK.Q	slr0212	4.43917e-15	3	572.3517	3					17365	56097.7	81459	271287	23529.8	147755	271742	270609
K.ALADYPLDGLTLR.L	SLR0323	7.51825e-14	2	781.43884	3	39676.9	35521.5	32313.9	38241.3	15419.8	27642.7	17393.9	18710.8	29524.8	53992.6	22630.3	34664.8
K.ALAEIQPNLPAVEEIPAIPQPLTEEEK.K	SLL1294	4.54856e-11	3	1076.5957	2					0	2515.32	1870.7	2743.91	0	0	0	0
K.ALAEIQPNLPAVEEIPAIPQPLTEEEKK.Q	SLL1294	5.09031e-12	3	1167.3257	5	4091.21	7775.01	10952.2	4173.3					0	0	0	1766.45
K.ALAEKETDGIAK.V	SLR1096	2.44266e-15	3	559.99646	10					4.43775e+06	5.97693e+06	5.93127e+06	6.89577e+06	79961.1	142616	160979	137613
K.ALAELGDCK.T	SLL1178	2.06289e-12	2	632.8435	2					306452	300430	604328	217902	258258	178729	160041	301874
K.ALAEPGLASICQLTAIGSR.S	sll0660	7.23679e-21	2	1036.5693	8	58971.6	53160.5	106939	72596	26304.6	32252.7	74498.2	27669.5	25196.7	18261	21015.8	17152.2
K.ALAGDRPVHDPTGELK.T	sll1425	1.31772e-16	2	982.5435	7					352847	555636	349162	450700	259248	465395	339004	491445
K.ALAILADQHYQQR.C	SLR1384	9.04979e-16	3	557.6398	1					7168.87	13080.6	17023.2	14579.7
K.ALAILQDLK.T	SLR1102	7.79965e-11	2	636.9104	3	94308.4	46957.2	65650.3	41767	65105.9	92097.3	100435	48733.7
K.ALALAALNPPNPPR.F	SLR1435	1.10725e-12	2	779.9621	1	27081.9	40693.4	22160.9	23965.4
K.ALAPQPGVLGESR.I	SLL1021	5.00455e-12	2	719.90936	3									23607.1	57975.4	61570.3	61770.1
K.ALAQAQSLGNR.G	SLR1968	4.73601e-14	2	636.8596	1					51801.3	85822	72673.6	62723.2
K.ALAQQTINPPTLTR.H	SLR0454	1.16682e-14	2	834.48096	2					38626.1	58946.5	55628.1	57228.9	25449.9	60948.4	44387.8	61298.7
K.ALAQSELPPGSR.Q	SLR1205	7.63239e-14	2	685.3809	27					666205	1.31867e+06	2.01076e+06	1.11346e+06	1.54016e+06	3.30726e+06	4.42293e+06	3.08321e+06
K.ALASDDNQTKYQVSPFYIQK.N	SLR1874	2.95548e-19	3	916.82367	1									11728.5	25663	83400.4	47479.8
K.ALCDHYNDLLR.G	SLR0863	1.31601e-15	2	767.3842	2					48196.1	83226.9	63954.5	62444.2	45918.9	81779.5	61484	46091
K.ALDDDEFK.S	sll1502	1.90272e-11	2	620.8164	3					85135.8	96303.3	376684	70744.1	3095.87	4265.51	4113.18	0
K.ALDDLLKEVDR.R	SLR1228	4.98429e-14	3	525.63745	3	33961	81587.9	39391.1	52112.1	24148.5	58255.3	21321.8	25325.1	35048.4	69230.5	25987.6	51407.1
K.ALDFTEQM*LESK.A	SLL1526	2.84981e-16	2	858.4414	8	330284	298105	268791	306389	144065	211570	205575	212380	132540	153614	75600.8	208101
K.ALDFTEQMLESK.A	SLL1526	2.84981e-16	2	850.4423	11	2.47064e+06	2.30381e+06	2.02103e+06	2.73448e+06	1.8103e+06	1.97261e+06	1.46865e+06	1.64354e+06	1.31079e+06	1.03572e+06	454747	1.31516e+06
K.ALDIEKQDELIK.K	slr7024	8.25763e-15	3	616.3659	6	494156	940871	224337	945456	701412	1.41866e+06	960059	1.14877e+06	45404.6	78510.9	17928.1	75447.9
K.ALDIEKQDELIKK.V	slr7024	3.56826e-16	3	707.09595	4					116377	222921	72816.2	286475	58572.3	98169.5	65521.4	91687.8
K.ALDKHDYHAEK.G	slr1984	3.63387e-16	3	586.9928	4	45165.1	9390.41	1806.28	4612.08	124431	144722	13865.7	48863.9
K.ALDLFLAR.R	SLL0572	3.75051e-10	2	531.82574	3	114328	88291.2	115920	134113	75500.8	115852	75655.4	141292	79624.3	80236	65854.8	83099.9
K.ALDPNDFK.T	SLL1559	1.2761e-11	2	604.3323	5					1.40032e+07	1.37675e+07	2.83957e+07	1.13388e+07	6.0357e+06	5065333	7.9049e+06	1.11659e+07
K.ALDPNDFKTLLEADSDKTIK.A	SLL1559	5.87142e-19	4	703.3949	4	87741.8	117583	89030.5	161899	37600.1	42872.6	49806.7	81602.7	38744.4	48146.6	44281.8	48024.6
K.ALDQVEEK.G	SLR2002	4.1645e-11	2	610.34174	1									11316.3	13518.1	28961.6	21186.9
K.ALDYLAAGVER.V	SLL0198	4.45152e-13	2	661.3654	4	157234	178388	454140	175872	55612.6	50039.6	123937	32173.8	73971.4	61230.4	157926	45974.4
K.ALEAGLSGDDALNAAFEENAK.D	sll1502	8.53573e-25	2	1197.6039	2	2178.54	4310.81	2348.98	2148.86	12067.4	11672.4	6971.5	9314.2
K.ALEAGLSGDDALNAAFEENAKDVAR.I	sll1502	7.9272e-24	3	945.817	14	74749.2	183984	105710	139631	143105	293559	177982	312455	125894	208937	218526	163352
K.ALEAGQHQQVLAQHCPN.V	SLR1932	1.79489e-13	3	682.341	2					8500.07	9910.81	13279.9	7928.17	11522.5	20261.5	16095.9	17342.8
K.ALEAGQHQQVLAQHCPNVFYGDNANFSNNVK.F	SLR1932	3.73582e-15	4	940.46313	2					11051.7	8567.15	14156.3	15792.4	12698.1	12093.2	13070.9	18367.5
K.ALEAPLHQLASNAGVEGSVIVEK.V	sll0416	5.07127e-26	3	874.1599	153	1.32121e+06	1.30508e+06	1.30088e+06	1.82055e+06	883789	1.47646e+06	646520	1.22979e+06	1.23364e+06	1.24713e+06	893133	1.05628e+06
K.ALEAPLHQLASNAGVEGSVIVEKVK.E	sll0416	1.9963e-27	3	997.90985	10	43775.4	82204	49192.1	125281	18541.9	39169.5	31005.3	77798.1	13329.9	63764.2	51538.1	40621.5
K.ALECEDYYVR.E	slr1878	7.86376e-15	2	731.3434	2	167951	212697	391089	299972					53416.7	60642.7	149013	87895.5
K.ALEDNEQILFR.Y	slr0520	3.78222e-14	2	746.3993	4	303646	419001	296888	406804	31219.5	61953.3	69147.1	50291.6	42238.9	62598.8	52977.4	51026.2
K.ALEELWLEVFK.Q	sll1314	1.76079e-14	2	832.9853	1					39847.6	140.14	1063.04	1149.29
K.ALEHGAPSVENVIVVQR.T	SLL0542	3.45359e-21	2	981.54706	6	88553.2	87142.3	67530.5	82721.3	21019.1	47466.4	16812.5	17159	14129.9	23032.7	4109.43	7520.84
K.ALEIDPSQIR.E	sll0306	1.12924e-12	2	643.36475	3	42663.4	51278.9	47815.7	53054.4	69555.8	99784.4	114206	68487.4	161863	106761	144186	132084
K.ALELASSEAEAANATK.S	SLL1871	7.70733e-20	2	932.4969	4	24674.5	57914.8	19035.7	46119.7	40807.8	73804.1	67286.1	118185	0	10240.9	2747.18	8954.32
K.ALELGVPIAQTWSCYAGGEEPCGR.C	SLR0527	3.48006e-14	3	922.44354	3	22884.7	16457.1	20619.1	20970.2	2393.98	0	5206.36	4607.94
K.ALELIPSM*KPDLVLCSGDM*VAGQSPK.L	SLR1895	3.64069e-15	3	1074.2384	1					4931.07	6432.08	15461.2	4136.83
K.ALELIPSM*KPDLVLCSGDMVAGQSPK.L	SLR1895	1.121e-20	3	1068.906	1	7588.46	8169.82	18098.3	8580.16
K.ALELIPSMKPDLVLCSGDMVAGQSPK.L	SLR1895	3.65279e-13	3	1063.5753	1									7463.33	11485	24010.6	11956.1
K.ALESELAFYGEVFGFTPAKN.-	SLR0825	1.91097e-13	2	1239.6461	2	2266.13	0	1804.24	1052.11	0	0	0	0
K.ALESSLTELATITGQK.P	sll1808	2.22788e-15	3	650.70465	1	8260.08	3609.83	4674.67	3831.4
K.ALESSLTELATITGQKPVVTR.A	sll1808	2.55464e-21	2	1251.7219	35	436854	976988	782841	680051	821731	1.61554e+06	2.40407e+06	1.67029e+06	902192	3.95014e+06	3.39651e+06	2.92966e+06
K.ALETYQETLAIEPNNK.V	slr0171	1.48881e-20	2	1061.5659	11	49281.2	154339	69915.4	80136.5	30619.9	51480.4	45288.2	31411.3	183296	238854	347486	210127
K.ALETYQETLAIEPNNKVAQR.R	slr0171	1.67572e-13	3	859.7958	4	39109.1	91597.5	32195.3	106764	29287.6	47758.4	35029.6	66345.9	7177.47	27575.5	17496.5	14991.8
K.ALEVLEHLLEER.L	SLR1793	6.79238e-15	3	532.3035	27	540129	202255	98963	286400	367502	600902	107247	321769	858393	749322	302273	333646
K.ALFATPTM*VEVLR.T	sll0837	6.81778e-13	2	804.4522	12	497013	343384	558118	445277	168433	213615	209119	140163	373106	484828	873224	364063
K.ALFATPTMVEVLR.T	sll0837	5.04369e-17	3	531.30536	11	119874	99529.8	130268	125340	633718	760089	807435	788410	86954	124027	205793	74833.7
K.ALFPGGTITGCPK.I	slr1979	1.32376e-17	2	803.94635	2					62504.5	93229.4	128799	80367.3	23385.7	37278.7	44398.9	44324.5
K.ALFVENPDSIAGVILEPVVGNAGFILPDAGFLEGLR.E	sll0017	9.23018e-10	4	964.2803	2					2412.59	2105.31	713.35	1388.2	1854.66	1670.93	824.19	1191.09
K.ALGADVISGVNPGQQFIK.I	slr1531	5.42376e-22	2	1051.5945	4	67562.2	53101.4	71346.7	62880	16992.8	27040.5	26684.1	17504.8	9648.66	8915.88	7047.49	7473.95
K.ALGATIADPCFADSYVEK.Y	sll0041	2.2213e-21	2	1108.5603	9	69718.9	184488	183298	59355.7	2170.29	12109	18271.6	3132.89	34533.6	181267	238985	142893
K.ALGATIADPCFADSYVEKYR.S	sll0041	1.63644e-14	3	845.43256	2					8324.24	8221.1	21172.4	29963.3
K.ALGDNLPIVAEDLGVITPEVEALRDEFNFPGM*K.V	SLL1676	2.80526e-11	3	1292.0193	3					7324.56	1133.84	0	1376.33	13516.9	0	0	0
K.ALGDNLPIVAEDLGVITPEVEALRDEFNFPGMK.V	SLL1676	9.34665e-12	3	1286.6846	6					11688	0	0	1338.47	20168	2217.6	0	2174.15
K.ALGEEEQLAVAAQLATQK.A	SLL1120	9.48538e-22	2	1079.6012	4	17933.4	24663	29526.7	29716.8	21374.3	26713.7	28184.4	18689	3400.2	6675.26	6849.42	5591.17
K.ALGGTVPFGQASK.L	sll1580	4.74347e-17	2	760.9375	15	30095.9	71422	41871.1	372811	144269	155824	180107	1.27145e+07	48986.5	57719.8	28795.2	2.01745e+07
K.ALGHQGHTIDVADQGK.T	SLR1837	2.34922e-15	3	645.6807	2					12349.2	19397.2	14662.2	14389.2	17774.6	32850.8	20057.4	21394.1
K.ALGLSNFGPK.R	SLR1503	3.97611e-13	2	646.384	1									43786	57491.2	63232.4	69612.4
K.ALGLSNLSLALNSVGNGGDR.Q	slr0357	4.00518e-10	2	1037.0574	1	12000.6	5652.68	9084.16	9082.48
K.ALGLYQEAIELNPK.M	slr0823	2.57494e-17	2	924.02985	11	346011	463418	276703	373613	422145	807414	281876	353027	86664.1	172382	51938.5	80863.6
K.ALGMPFR.S	sll1808	2.09067e-10	2	468.26572	3					413974	792513	762870	255338	134107	213913	131123	117752
K.ALGQTVGEVM*NDVPISILPTQTLR.E	SLR0172	1.82345e-18	2	1356.7428	54	106172	113898	130745	113545	27812.5	69313.4	40533.9	21740	3320.94	7786.87	7502.09	5298.92
K.ALGQTVGEVMNDVPISILPTQTLR.E	SLR0172	3.91768e-21	2	1348.7441	18	30133.8	35864	33818	46100.2	3122.34	13243.1	14878.3	10212.5	0	49512.1	6398.89	13618.8
K.ALGSHLGEEVSSAYER.L	slr0649	3.01571e-20	2	924.9659	9	194563	200107	237051	198712	193550	284081	164542	156184	104559	136766	102391	160637
K.ALGVTATGLSSPEFK.Q	slr1734	4.06633e-19	2	883.50116	12	233248	406726	448919	383204	796778	1.00644e+06	1.41924e+06	1.08604e+06	1.7987e+06	2.30188e+06	2.72505e+06	2.35499e+06
K.ALGYLGEYLEK.L	slr1848	6.57667e-14	2	772.4344	2	152528	33475.2	73773.1	50553.1	186947	183462	103284	74583.4
K.ALHICEETFAPLEVAYDYDLIRR.H	sll1688	3.65468e-19	4	735.3783	1					13921.9	2631.81	4620.96	3715.48
K.ALIGELDEGWQTM*LK.Y	SLL0997	2.71144e-18	3	670.02844	11	33973.4	33833.7	51174.8	35711.7	43344.7	53464.9	50398.5	33732.1	73070.5	122887	138991	64009.6
K.ALIGELDEGWQTMLK.Y	SLL0997	3.13899e-19	2	996.54175	20	218809	204054	323114	147266	70070.9	138470	107189	71101.4	111513	144761	176752	71648.3
K.ALIITHSETSTGVLNDLAAINAAAK.A	SLL1559	3.50611e-19	3	928.19165	60	916085	222027	615904	752565	877471	779320	604347	1.02816e+06	317673	300367	424290	187473
K.ALIQEGLSQLK.G	sll6060	2.68977e-13	2	744.4551	4	73748.3	65340.6	100364	122060	17690.4	22636.7	27344.1	43455.9	144771	143029	105909	346181
K.ALKAEEQFWPALNNIGLIEYEQGK.I	sll0837	4.12798e-19	3	1064.918	3	16998.3	2742.83	7241.61	7808.97	7979.06	4018.42	2696.98	3735.17
K.ALKEEGYEVVLVNSNPASIMTDPELADR.T	sll0370	4.43364e-11	3	1117.244	1					0	0	0	0
K.ALKENEGDLEK.S	sll1261	1.58754e-14	2	839.4714	5	1874.18	2130.63	1289.73	1422	195339	153087	257093	289813
K.ALKENEGDLEKSIEWLR.Q	sll1261	8.02579e-17	4	616.34656	1									19663.8	46624.7	163892	38532.8
K.ALKLDLLR.G	sll1679	8.56065e-10	2	615.412	4	340484	283568	231526	307500	210196	200331	172284	206102
K.ALLAASGR.V	SLR1096	3.77805e-10	2	451.78067	2	3175.6	5562.29	4693.52	4591.73					53526.5	106590	108988	95905.9
K.ALLADGLPIFSLAQSRPSLDDVYLAATGK.T	SLL0759	7.66398e-18	3	1097.6171	5	52407.6	6888.59	5534.89	8979.79	21067.6	5333.79	0	2927.64	25287	0	5527.8	0
K.ALLAGAILR.G	SLL1446	2.00623e-10	2	521.3487	2					68451.1	97753.1	43710.1	69590.1	172056	126816	71405.3	115066
K.ALLALFEPM*GLTGK.N	slr0774	2.01245e-17	2	883.0128	6	25138.1	16321.4	19243	21028	39338.9	50829.8	38887.2	54543.8
K.ALLALFEPMGLTGK.N	slr0774	3.00829e-17	3	583.68036	1	13275.1	11301.3	8896.41	12436.6
K.ALLDLALQPDYGPASVK.A	SLR0846	1.42186e-20	2	1030.0885	1									12557.3	12082.1	27025.6	19136.8
K.ALLEACAYCADPNHEM*EIR.E	slr0043	1.49709e-21	3	808.37024	7	90391.5	60658.2	37459.2	64545	79131.1	75027.1	11139.2	67970	142465	154192	47924.3	108762
K.ALLEACAYCADPNHEMEIR.E	slr0043	4.38441e-26	3	803.0371	6	31507.9	16753.4	0	13510.1	262968	279592	20901.1	216353	39798.4	33269.5	0	18874.6
K.ALLEACEYCDDRR.H	sll1452	2.48868e-14	3	605.6123	4	47143.5	66815.3	192091	78979.3	52798.2	120537	344040	121806	186314	335719	386143	217978
K.ALLEARPDTANLK.R	slr0798	2.98874e-15	3	567.3358	1					40997.2	81579.9	104097	63643.3
K.ALLEELDIEFSPLGSTTFK.N	SLL1186	1.01371e-22	2	1199.6555	4	3102.74	0	1765.53	0	8065.31	5432.95	2925.64	1814.84	2551.62	2588.72	1628.12	0
K.ALLFKESYLQGR.A	slr0528	1.36935e-13	3	571.6688	1					24582.8	42502.9	28505.9	70451.4
K.ALLGSDNFSDK.V	SLL1663	1.12669e-14	2	727.8892	2					110723	157859	156466	77334.4	138997	123264	79475.4	124251
K.ALLGSDNFSDKVR.G	SLL1663	9.35846e-16	3	570.65155	6	397041	608178	478163	548749	283284	402655	563537	465356	90074.7	133783	140437	105836
K.ALLHSQCPEVLVK.G	SLL1433	2.09173e-14	3	594.67755	2	31843	45461.1	60667.3	28473	96384.2	96508.6	164205	87012.5
K.ALLM*AVM*EAQQWCDQAENKEEMCQILSK.R	sll1450	9.81935e-17	4	955.46155	1					5280.57	9334.21	9197.22	8137.2
K.ALLNQHLANHTGK.S	slr0542	2.08221e-17	4	426.99838	3					78378.5	71023.2	74041.6	55134	116439	127335	106627	123212
K.ALLSIFGR.E	sll1742	3.82096e-10	2	510.81998	7	196664	150593	195358	267795	127813	181708	114933	128780	184845	216978	213583	143202
K.ALLTTLQPR.L	slr0387	2.69306e-11	2	578.86194	2					63005.1	82659.6	287523	124701	51165.3	59624.7	114792	83815.6
K.ALLVQLESYR.L	SLL1213	8.58972e-13	2	668.3934	4	171516	357.29	50480.7	25886.1	110502	16640.6	13644.5	13213	193889	26436.5	31310.9	34971.5
K.ALNAALAQIER.S	sll0569	1.79246e-13	2	657.3865	9	400347	422033	645822	895995	401459	550530	1.14501e+06	1.04112e+06	1.06738e+06	1.07095e+06	2.17742e+06	2.46559e+06
K.ALNEGIGKFDPETIQIDTVGPTVGK.A	slr0775	2.14133e-14	3	1011.2272	2	6360.86	0	6500.53	3070.38	8675	8196.75	10028.5	5259.87
K.ALNIYNSDIGGLSR.G	SLR0897	6.88413e-16	2	818.94434	2	108315	52275	22459.1	21486.2	178237	163677	81574.4	43593.5
K.ALNLPLFAPDNAASNAITAVAPLGVEAEK.I	SLL1559	6.15548e-24	4	792.1911	61	72295.6	17311.1	55481.2	56412.1	76458.5	86964.5	165757	72421.1	27954.4	25076	23863.7	24962.6
K.ALNLPLFAPDNAASNAITAVAPLGVEAEKIR.S	SLL1559	2.73326e-22	3	1145.9755	28	3593.25	8140.69	12759.4	92475.1	86206.1	23519	8218.67	103150	10901.5	15169.5	28713.6	180312
K.ALNNPNINIK.T	sll0430	2.65041e-13	2	699.9178	6					569216	1098942	287417	1.31197e+06	1.68997e+06	3.71318e+06	1.38828e+06	4.65627e+06
K.ALNSAGPINIQAR.V	SLR1616	6.08413e-16	2	734.9218	2					104248	159858	491694	311847	59052.1	72245.5	287309	207911
K.ALPLLAEK.A	slr2058	9.76347e-10	2	571.8705	1									63985.9	122757	75078.6	92524
K.ALPLVGDDIDTDR.I	SLL1444	2.56724e-16	2	772.4076	4	851849	1.14772e+06	1.35129e+06	921127	195158	658940	795191	300296	383873	582533	619409	707221
K.ALPLVGDDIDTDRIIPAR.F	SLL1444	2.22118e-18	3	698.7272	12	254022	1.8439e+06	1.62362e+06	2.18746e+06	239551	562726	1.08065e+06	958448	432593	2.27376e+06	4.64701e+06	2.81865e+06
K.ALPNLHPCLTGWPSR.S	SLL0487	7.66127e-19	3	621.66534	2	52260.9	93761.8	90767	102770					28906.2	28763.9	39097.6	25357.7
K.ALPSNDIQM*QLNEGNQPVIFTPLGGLK.M	slr0965	2.31279e-17	3	1066.9095	11	2935.59	0	2710.52	1910.07	4889.75	14946.8	10862.3	25336.3	6915.3	15567.3	27027	24379.9
K.ALPSNDIQMQLNEGNQPVIFTPLGGLK.M	slr0965	1.03623e-17	3	1061.5765	6	15916.8	4012.43	16715.1	19757.5	5828.98	5754.76	3795.23	7811.17	1709.55	2235.59	2349.87	3047.08
K.ALQDGYLTPAM*EAEVGR.L	SLR1970	1.7991e-17	2	990.9939	8	138952	148254	169339	172371	60262.2	74557.4	103171	62446.2	52154.5	93237.7	111699	76773.3
K.ALQDGYLTPAMEAEVGR.L	SLR1970	2.01696e-20	2	982.9974	7	215437	316374	362497	204863	178770	302992	513827	207693	159065	272683	303025	249321
K.ALQEGTSDIHVEPQEETLR.I	slr0063	1.11018e-21	3	765.72327	18	1.02237e+06	1.71411e+06	2461366	1.97568e+06	88400.6	392162	723406	393298	438369	632575	1.69019e+06	1.36237e+06
K.ALQELPLSR.Q	SLL1372	4.47094e-11	2	585.8513	1									159433	270187	212608	246967
K.ALQETIDRNRPSGAK.G	sll1744	1.83694e-12	4	486.7765	4					49534	163823	108585	149069	452859	533007	423556	517105
K.ALQNGVDIYTLK.G	SSL3044	1.24189e-10	2	812.4652	1	232708	308901	494029	398449
K.ALQNQEYQSAIEALEMVCR.R	SLR1939	3.91543e-23	2	1199.0883	4	9364.07	11193.2	12654.8	16958.4	9406.42	11025.2	12059	12798.5	15959.8	27899.3	23204.6	17141.9
K.ALQPHLPPVATLR.E	SLL0377	8.51285e-15	3	519.65125	1					15478.9	51067.4	30901.5	33536.5
K.ALQPILEM*EDPESAIIFVR.T	slr0083	1.64415e-17	2	1166.1254	2	6682.38	0	0	1596.91	2323.04	0	2387.28	0
K.ALQPILEMEDPESAIIFVR.T	slr0083	9.17801e-20	3	772.42114	7	43198.7	14314.3	16231.4	21993.6	59565.2	22961	10530.4	35335	32351.5	4799.67	16203.9	9727.01
K.ALQSLSEEDPTFR.V	sll1098	4.25488e-14	2	818.9179	1									140572	309166	327742	490667
K.ALQTDM*QK.L	SLR1301	1.01645e-11	2	619.8359	1									753.51	1033.42	1883.3	1339.95
K.ALQTLAPEIPAYVLPTLYYGK.S	SLR0596	7.96096e-21	3	870.5005	9	24864.8	22107.1	26306.3	20549.7	6478.87	5900.03	5821.82	4279.55	12044.2	10360.7	0	0
K.ALQTVPPELEELGK.Y	SLL1165	1.63052e-17	2	906.52185	2	5303.71	15370	17088.5	13423.6	19899.6	38561.3	42263.7	30154.6
K.ALQTYAPIWK.A	SLL0744	6.39167e-14	2	739.93335	1									71979	190589	142142	198927
K.ALQYYAEALALGK.S	SLL0499	2.38165e-16	2	849.9866	2					24815.7	23509.2	20131.3	32263.6
K.ALSDIICTSSNAVK.I	sll0622	2.44906e-18	2	883.98206	1	34943.3	23887.8	31405.1	27546.2
K.ALTADM*APVYEQFGLDPK.E	slr0399	7.34938e-15	2	1135.585	12	11163.7	14200.8	21972.3	17472.5	15327.9	40185.3	59357.9	53260.9	79908	105021	131186	83712.4
K.ALTADMAPVYEQFGLDPK.E	slr0399	1.88175e-15	3	752.06116	9	12146.8	11759.9	112541	6130.91	14266.2	13736.2	53856.8	8480.57	41333.2	43992.2	13690.6	49741.7
K.ALTDEAETLLK.E	sll1326	8.91543e-14	2	746.4282	26	2.77264e+06	4.76098e+07	4.9738e+07	2.83156e+07	1.94012e+06	2.41837e+07	3.13727e+07	1.13557e+07	1.06708e+06	1.05214e+07	9.31651e+06	9.89559e+06
K.ALTDEAETLLKEGIK.E	sll1326	3.07499e-18	2	1032.1007	22	87555.1	1.38667e+06	852352	1.04737e+06	28421.3	418342	684910	568251	141587	1.10876e+06	1.56015e+06	1.04251e+06
K.ALTDEAETLLKEGIKEFTQGFAA.-	sll1326	2.08007e-22	3	972.19794	33	6308.15	228281	59725.7	421803	41687.2	247224	76694.7	603123	21944.8	198176	216485	155388
K.ALTDNAQSLVNGAAQAVYNK.F	sll1578	1.67254e-25	2	1168.6261	80	5.49917e+06	225481	325416	4.37401e+06	1.51328e+06	171204	209365	957088	580306	92212.6	60746.6	1.42839e+06
K.ALTDNAQSLVNGAAQAVYNKFPY.T	sll1578	4.44404e-13	2	1372.7141	7	48036.5	0	0	33375.6					25987.3	0	0	25131.6
K.ALTDNAQSLVNGAAQAVYNKFPYTTQTQGNNFAADQR.G	sll1578	4.71299e-13	4	1070.0327	11	5468.25	0	0	7333.16	0	0	0	33632.6	2116.09	0	0	3607.14
K.ALTEFAIDVTGR.I	SLR0950	2.42136e-15	2	718.898	2					68939.6	93967.2	66301.8	89147.9	83352	91211.7	62643.1	76484
K.ALTIAGETLVSEGDRQR.Q	slr0387	6.12223e-13	3	654.02405	1									67086.5	64871.5	69084.5	51746.6
K.ALTLPTVQGK.T	SLR0863	4.34489e-13	2	658.4115	2									200106	706060	458375	426596
K.ALTVEVER.G	slr0020	6.31607e-11	2	530.8088	2					92730.6	86801.3	96594.3	59719.1	16457.3	33492.8	25867.8	24593.3
K.ALVAATADAQAQAR.V	SLR0431	1.36563e-17	3	500.94635	16	1.83352e+06	1.78392e+06	2.44008e+06	3.07187e+06	150412	228923	238758	200412	138704	248228	287995	254943
K.ALVEGAVGVAR.T	slr2034	4.67705e-14	2	593.3563	9	1.6121e+06	2.89056e+06	2.64571e+06	1.82804e+06	123328	271706	251197	132880	655940	1.26769e+06	745192	630185
K.ALVQNM*VAAM*AAPTFR.V	SLL1841	5.8689e-17	2	933.98737	9	144579	152887	246411	132162	92431.5	154937	171452	92501.7	159241	230092	188776	177963
K.ALVQNM*VAAMAAPTFR.V	SLL1841	2.39912e-19	2	925.99066	2	21711.6	35802.8	32187.7	25567.8	29802.1	48240	58973.6	27838.6
K.ALVQNMVAAM*AAPTFR.V	SLL1841	2.76612e-17	2	925.9915	5	36357	51710.4	50819.5	45729.7	45542.1	93500.5	72815.2	49221.9	180811	255351	143827	221788
K.ALVQNMVAAMAAPTFR.V	SLL1841	1.60381e-19	2	917.9948	11	169736	170146	153640	142683	22566.1	31376.1	19109.5	20127	49962.6	58101.4	34369.1	39927
K.ALVVSESAK.A	SLR1968	4.64883e-12	2	596.3614	2	26677.4	41839.4	10528.1	36397.5					56088.5	71416.9	57512.2	58326.1
K.ALYTGDIQLAEAIR.A	slr0652	5.54527e-17	2	839.4679	14	529144	448985	971189	707856	316883	607918	966172	529792	365002	522966	645942	416812
K.AM*GYDSCPM*IGFDLQK.V	SLR1719	1.2349e-19	2	1077.0023	9	69091.7	59073	185828	75437.6	43837.8	47984.2	115905	64865.7	35025.8	29852.9	84013.3	49892.4
K.AM*GYDSCPMIGFDLQK.V	SLR1719	3.46363e-22	2	1069.0037	8	71337.3	70131.8	162353	81721.7	73241.3	83880.5	178096	104168
K.AM*ICGGTEAAITPLSYAGFASAR.A	SLL1069	6.19061e-25	2	1238.113	14	38013	26073	53900.7	43577	12778.7	20521	27603.1	27062.8	0	4974.75	8275.7	0
K.AM*IDPSTADITAR.V	slr2089	7.15135e-16	2	761.3874	1									64247	85856.9	87816.8	150512
K.AM*LEEAMTLTETVINR.L	SLL0271	6.34456e-14	2	991.50366	1					7602.95	9916.21	7887.92	6315.23
K.AM*M*DFPAVQK.A	SLR0244	5.19295e-15	2	729.37024	4					99548.9	173654	167637	109951	1.1298e+06	1.79067e+06	1.31641e+06	1.31485e+06
K.AM*M*SLPATK.G	sll1747	3.18646e-11	2	635.34296	1									999.02	1551.32	1515.67	1810.05
K.AM*MDFPAVQK.A	SLR0244	4.21505e-15	2	721.37317	5					92840.2	172774	198007	116463	58278.9	101639	67088.2	65365.9
K.AM*MSLPATK.G	sll1747	3.24121e-13	2	627.34467	2					187748	276402	397389	418028
K.AM*NTCLAAEDFPR.D	SLR0420	1.41215e-18	2	828.3847	5	40784.6	66663.6	52581.9	50806.4	47560.1	113041	221262	83199.9	44565.9	109890	97500.7	86046.8
K.AM*PGGPYENLEAK.R	slr0261	1.87123e-17	2	840.9268	20					4.15208e+06	8.49693e+06	1.19063e+07	6.90666e+06	3.38531e+06	5.44571e+06	6.05273e+06	6.81133e+06
K.AM*PGGPYENLEAKR.L	slr0261	3.73854e-19	3	612.98816	6					414874	743854	1.30526e+06	867353	116794	183545	269686	215380
K.AM*QDAIK.-	sll5034	2.80144e-10	2	540.8017	1	354.36	779.51	578.91	291.81
K.AM*QIFEQLPVITESDITK.Q	SLR0869	1.95915e-11	3	789.7622	1									21236.8	38387.1	20921.8	24543
K.AM*RQDEDYVCSTYR.D	SLR1934	4.49049e-11	2	977.42926	1					5804.83	9203.03	9162.84	14626.7
K.AM*SDGPQSLTPDRFDETM*K.Q	sll0934	7.45114e-11	3	816.0526	2	147535	153609	203438	140133
K.AM*SDGPQSLTPDRFDETMK.Q	sll0934	6.64292e-18	3	810.7204	14	291248	441456	475974	415530	231188	326799	488712	390832	139075	228219	219169	268053
K.AM*SPELLTAFAK.A	slr1196	5.9163e-16	2	791.93976	1					62717.1	57146.3	50527.7	41317.8
K.AMAMLESVGLGAK.A	slr0467	3.73007e-17	2	783.4361	1	49478	63137.8	55212.3	66150.2
K.AMGYDSCPM*IGFDLQK.V	SLR1719	2.61815e-21	2	1069.0033	5	61062.6	40526.8	118347	78067.8	18864.4	21508.4	47001.3	21156.2
K.AMGYDSCPMIGFDLQK.V	SLR1719	8.76443e-22	2	1061.0068	4	52130.7	40982.1	144077	73835.3	61007.2	32381.3	116556	61419.4	33672.9	44634.3	84301.2	43711.7
K.AMICGGTEAAITPLSYAGFASAR.A	SLL1069	1.31761e-21	2	1230.1138	12	35826.5	29792.7	30118.8	27414.1	9323.6	14367.2	20238.7	17723.9
K.AMIDPSTADITAR.V	slr2089	3.17356e-14	2	753.38605	2	52622.3	52848	51125.4	70491					60373	55179.1	70369.4	110689
K.AMKQADSLIER.V	SLR1890	5.38824e-14	2	775.4332	2									42367.6	53582.7	176630	67231.4
K.AMLEEAM*TLTETVINR.L	SLL0271	7.35285e-21	2	991.5049	3					9036.91	7985.28	3802.99	4498.34	2906.24	3299.86	2847.05	1656.42
K.AMLEEAMTLTETVINR.L	SLL0271	7.35285e-21	3	656.01056	13	32264.4	9751.35	20898	9934.05	30621	61729.9	29291.1	23093.2	44621.4	36066.5	28466.2	19217.8
K.AMM*DFPAVQK.A	SLR0244	4.21505e-15	2	721.37634	5					117031	208187	164791	144167	177334	484812	265636	292381
K.AMMDFPAVQK.A	SLR0244	4.21505e-15	2	713.37476	2					187513	501571	541404	286073
K.AMMSLPATK.G	sll1747	3.24121e-13	2	619.3461	5					584499	1.20961e+06	1.12308e+06	1.54349e+06	338482	446056	517434	617025
K.AMNTCLAAEDFPR.D	SLR0420	1.41215e-18	2	820.388	5	59894.9	88998.9	153392	110839	305565	847745	2.14439e+06	552229	175268	421769	420626	347965
K.AMPGGPYENLEAK.R	slr0261	6.19434e-18	2	832.9302	24	651622	1.24908e+06	1.17097e+06	790829	1.80679e+06	3.51364e+06	4.97948e+06	3.04375e+06	3.6486e+06	4.74866e+06	5.77472e+06	6.43013e+06
K.AMPGGPYENLEAKR.L	slr0261	4.37232e-19	3	607.6562	6	31777.8	61976	55394.2	40706.4	276279	407061	571179	390757	495075	800182	964896	793605
K.AMQIFEQLPVITESDITK.Q	SLR0869	4.01333e-21	2	1176.144	9	22916	31991.2	13663.6	32638.4	8860.49	19259.1	7601.11	15770.6	31658.6	59895.4	27757.2	35962
K.AMRQDEDYVCSTYR.D	SLR1934	9.51435e-18	3	646.6236	4	21775.7	15949.4	14174.3	22034.8	94402.1	61855.2	126488	80587.5	21736.4	22805.4	12526.6	18538
K.AMRTEGIDVLSFTAGEPDFTTPPHIVEAAK.L	sll0402	1.33147e-15	4	872.70135	3	17028.6	8355.81	18979	14600.9	12103.5	0	7383.59	9365.97	6885.07	8215.44	6620.5	0
K.AMSDGPQSLTPDRFDETM*K.Q	sll0934	2.56204e-12	3	810.72144	9	108426	184623	204022	152994	41617.8	63681.1	119172	76729	229535	387171	556669	495463
K.AMSDGPQSLTPDRFDETMK.Q	sll0934	1.03822e-17	3	805.3898	7	638895	943181	781460	852995	161586	221164	260547	208682	10335.2	19888.6	31328.2	22820.7
K.AMSPELLTAFAK.A	slr1196	5.9163e-16	2	783.94415	3	77220.8	81756.8	77961.5	112084	47969	70709.8	73656.3	60302	55845.7	62110.8	45618.4	68581.9
K.ANADIIQISGHDGGTGASPLSSIK.H	sll1499	8.69698e-29	3	866.46423	11	171746	117363	148858	147220	135514	110750	102005	120559	40286.6	29091.4	23280.5	32877.1
K.ANAELQQTLGGLGTSSATSAFER.M	sll0617	2.67818e-18	3	818.4179	38	442881	585212	509578	756921	42589.7	794817	246461	839215	457260	762594	1.32125e+06	595105
K.ANAFFVAQDCHPQTIEVIK.T	SLR0293	3.58633e-22	3	826.1018	7	217119	60346.8	144442	197908	274455	124029	155319	281263	61243.2	19995.9	26325.7	57541.4
K.ANAIDTLIFCVGPK.L	SLR0380	1.7899e-18	2	904.0074	6	96511.9	34934.3	67769.9	55232.8	52898.5	48322.9	36052.4	52794	33846.5	22553.8	14444.5	17304.3
K.ANAPCIVFIDEIDAVGR.Q	slr1604	6.54633e-22	2	1002.5217	26	643223	325271	432576	420300	920306	1.19219e+06	675739	762057	26521.2	19500.2	17850.5	15221.7
K.ANAPSSPNVEPAYR.I	SLL1862	3.36767e-17	3	539.6093	4					57968.9	158294	81595.5	115057	56793.1	239671	98545.7	294037
K.ANEAITGLNAQLK.Q	slr0114	2.98308e-16	2	815.9703	3	39677.2	58176.9	52575.4	75768.1	21531.7	42155.4	46450.1	45415.8	16689.6	27920.2	20220.6	38725.2
K.ANFATAKEELEQANK.E	SLL0208	1.0561e-19	2	1048.5729	7	246945	157493	71826.3	60476.1	561464	808865	444685	406988	363914	318755	162028	271029
K.ANFATAKEELEQANKENLPLVWK.M	SLL0208	1.28255e-17	4	805.44904	10	165374	201656	86530.8	227547	318629	497337	169586	614710	221762	298245	170195	239373
K.ANGKFVCPCHGAEFAATGK.V	sll1182	1.05914e-14	3	819.07764	1									8735.64	31869.2	37479.4	21019.5
K.ANHGLSGDAR.D	sll1578	1.2212e-12	2	571.2969	3	1211.98	132.91	106.28	474.34	1338.82	14.03	147.23	724.95	1329.11	49.89	144.99	1303.65
K.ANHGLSGDARDEA.N	sll1578	2.53963e-12	3	486.2361	4	1129.07	0	0	265.45	2813.71	50.01	324.13	1356.68	2581.27	0	220.83	886.44
K.ANHGLSGDARDEAN.S	sll1578	6.30046e-15	3	524.25	15	3266.38	66.89	0	2672.26	7293.26	218.28	466.54	6687.46	7322.44	458.42	2438.89	6497.7
K.ANHGLSGDARDEANS.Y	sll1578	2.18772e-13	3	553.2614	1					576.2	95.78	0	239.83
K.ANHGLSGDARDEANSYLD.Y	sll1578	3.18552e-11	2	1024.9729	1	13139.8	2311.55	2720.76	8183.28
K.ANHPVVGGLILDSLR.Y	SLR0237	1.78311e-17	3	569.0017	2	20559.9	5594.62	8431.23	12383.1	19933	9945.81	4885.49	6912.13
K.ANIEINRK.M	sll0767	1.73904e-10	3	415.92157	2	16698	15676.8	13296.9	12432.7					40004.3	33660.3	23387	44091.9
K.ANIFKHEQEQYFPR.I	sll0672	6.51274e-20	3	699.03577	5	46215.6	78493.8	38483.9	46518.4	29231.2	67506.8	3057.96	38635.1	197585	475858	57633.4	143664
K.ANIPHIIVQGR.K	SLR1467	2.31854e-14	3	454.6088	2					75318.2	165299	352281	299356	24365.3	53443.7	20337.6	37873.8
K.ANLGFRFPCDGPGR.G	slr1834	1.50092e-16	3	569.955	3	78118.2	40457.9	72667.3	55381	160438	130530	200722	158378	70615.3	47787.8	38053.3	51714.7
K.ANLLSQAQQIQLDDLR.T	slr1938	3.34461e-19	2	985.5424	9	211800	225329	305266	197963	56255.8	108727	96407.1	60058.4	51159.4	70459.7	60399.6	49091.8
K.ANLPFQLLIPGDYNQGSGFHNTANK.E	SLL0645	1.68138e-10	3	1002.5192	2					2492.39	6846.49	4722.67	0	13159	13842.6	7218.95	8171.79
K.ANLQEAELIEAFFAR.A	SLR1819	2.00198e-18	2	933.50037	7	164778	26608.1	46949	47103.2	5493.48	6765.27	4555.04	3699.74	9387.93	7079.65	7252.9	4405.82
K.ANLQYLDIVR.I	SLL1676	4.92943e-13	2	674.8898	1					168958	52071.8	107998	34392.7
K.ANLSDLYQR.A	slr1729	2.75959e-12	2	612.32794	1					48837.2	116689	120904	119929
K.ANLVAPINYK.G	sll0041	1.46758e-13	2	695.91785	4					236396	248748	240890	123272	291252	232632	243574	215384
K.ANLYANQGIWQDTLM*IVASLPEQR.Q	SLL1891	5.98947e-20	3	964.50146	3	13717	4023.62	0	0					6435.68	4700.38	3847.27	0
K.ANLYANQGIWQDTLMIVASLPEQR.Q	SLL1891	4.31006e-21	3	959.1697	2	10862.1	1281.84	0	2565.77	4524.95	2562.08	2150.78	3020.67
K.ANLYSQAMTEK.V	SLR0207	1.31445e-15	2	772.4019	1									41301.6	47811	44835.1	46905.8
K.ANPAPPVGPALGQHGVN.I	sll1743	5.73736e-14	2	870.468	1									39423.2	62176.4	48078.3	37002.2
K.ANPAPPVGPALGQHGVNIMAF.C	sll1743	3.64224e-13	2	1101.5844	5	96521.7	59343.1	84661.3	25743.8	10049.8	14345	12982.8	6425.96	55832.7	38749.4	0	40164.3
K.ANPTLENLEIR.Q	slr6012	3.82229e-14	2	707.39453	2					63526.9	157364	70440.4	110130	138377	279530	72501.2	348700
K.ANQDLYR.L	slr0051	2.39045e-10	2	512.2704	1	1908.31	3428.36	6783.88	1916.08
K.ANQLSQICEPYYR.V	SLL1174	5.68299e-15	2	893.4381	3	34720.6	67409.1	87727.8	77474.1	20391.7	36876.5	71525.2	59236.1	14823.9	34111.2	34525.8	44331.8
K.ANQVAKVEVDTNR.R	slr1390	1.60953e-14	3	577.99023	1									12125.4	32227.9	22866.5	18233.8
K.ANQVAKVEVDTNRR.Q	slr1390	7.8847e-14	3	630.0243	3					8066.24	13387	10921.1	18097.9	28360.7	88643.1	63633.8	44782.7
K.ANSDHKDLFNLK.I	SLL1343	1.38142e-10	4	459.26324	1									88684.8	65260	24489.5	30881.7
K.ANSLSPDEIHLAR.Q	slr0063	7.73064e-17	2	783.92163	7					148103	241275	441925	342119	338536	648576	1.35476e+06	1.08078e+06
K.ANTPTAETHFSQPIFTM*GGEFATK.S	SLL1305	1.02149e-26	3	963.14246	12	204680	401384	185228	364951	51811.1	128363	75872.4	108617	98672.4	158692	74183	136565
K.ANTPTAETHFSQPIFTMGGEFATK.S	SLL1305	2.68621e-28	3	957.8122	16	153139	261612	104425	210830	335577	836592	236723	595224	150606	271746	95292.2	187808
K.ANVEHQM*AVLIQSPVLSQLIAEER.L	slr0051	5.78546e-21	3	945.8449	12	69427.4	11076.9	45613.1	51962.4	33845	35830.9	43221.5	39094.6	70910.9	88407.8	94523.7	81786.9
K.ANVEHQMAVLIQSPVLSQLIAEER.L	slr0051	1.45201e-24	3	940.51434	10	67518.6	11661.1	26123.3	18453	6867.16	9755.46	3576.55	8287.69	25310.8	13759.8	14388.6	13277.3
K.ANVLDVSQLWR.D	slr1517	7.24328e-15	2	722.90564	3	238744	105674	182438	164304	86352.8	95173.5	92498.2	58224.4	171289	173714	82603	137087
K.ANVLHTPTVLNIALDSAK.F	SLL0147	2.83841e-20	2	1083.1305	6	28769.2	38841	48344.6	34708.4	116611	151517	181397	98512	46577.3	100135	89020.6	61799.7
K.ANYDAGILTLTLPK.V	sll1514	1.88802e-17	2	889.51874	9	219938	130069	68848.5	192425	105603	125865	52337.7	88984.8	42064.1	53359.7	28228.2	30513.8
K.ANYDAGILTLTLPKVEEAK.N	sll1514	1.10144e-20	2	1239.7109	11	77679.4	143188	45929.3	234751	195828	280115	123010	581519	126785	226285	103015	245992
K.ANYFTQNPILKPR.L	SLL1526	2.49311e-17	3	617.35547	3	44881.2	33227	27698.2	39623.3	45421.8	49438.9	31114	33786.8	27737.6	43302.1	15756.9	29355.8
K.APAGAPGGDFDY.-	slr2076	5.77354e-10	1	1281.5876	2	6480.62	4024.16	3943.08	4947.48					42478.9	16285.5	22860.3	26302
K.APEEVIAGAK.E	slr0557	3.86104e-13	2	636.8722	1					70648.3	95255.9	52260.4	79006.7
K.APEKNVAIVSTNK.S	slr1780	8.78459e-14	3	601.69415	1									32360.9	22092.8	54298.6	37476
K.APELGLM*K.I	SLR1176	4.79172e-11	2	581.8392	3									94544.3	122883	131759	155929
K.APELGLMK.I	SLR1176	5.8983e-11	2	573.8422	3					208870	231890	402160	272050	235306	243923	424599	426785
K.APGNQAAIGGLK.V	SLL0726	3.35884e-15	2	692.9088	2					240377	268346	273902	126065	57462.5	59229.2	53961.1	72482.3
K.APIDGIVVDPATTPEHEIK.V	slr6042	1.81875e-18	3	764.089	2	55278.7	36573.2	52007.5	59558.8	27091.4	30090.2	33069.9	32766
K.APLETLGLEGEYNILVNAHGGGLTGQADAVK.L	sll1822	1.57131e-30	3	1132.6086	44	82011.9	33883.9	32098	25074.3	80158.3	115483	110611	92221.2	46042.5	26896.9	17075.9	19513.8
K.APLVPVFRLEEDQEAAR.L	SLL0102	4.17127e-15	3	695.38025	3	43303.6	73815.2	62978.9	73043.9	75712.4	140299	160577	145194	40072.1	76143.2	71991	54640.8
K.APPEKDLEWDDADVEGQFR.F	sll1074	8.58908e-22	3	835.74365	5	112772	49801.1	26652.2	90354.9	104470	60147.7	28974.8	60351.1	127113	47570.2	17770.3	63136.4
K.APPGKVESCYFLSILEDGM*R.R	SLR0670	2.01402e-14	3	858.43915	3					145863	140224	36284	46249.3
K.APPGKVESCYFLSILEDGMR.R	SLR0670	1.34075e-16	3	853.10834	3	180724	4844.25	50341.7	32359.3	33462.1	26905	7112.96	10193	52436.6	9159.93	8299.77	5689.2
K.APPGSWMVESFVPYER.E	sll0578	6.80327e-19	2	998.4924	3	45393.6	29756.8	30361.3	33646.2	10634.9	24150.9	17432.6	22347.4	27079.3	32615.7	12914.9	19953
K.APPRPLSLTASVAEFCR.G	SLR0145	6.61196e-20	3	672.6989	1					35714.2	57255.7	59018.5	42316.1
K.APQAAGVIHTDFER.G	SLL0245	9.23874e-19	3	552.6252	11	265249	447428	316971	429923	740141	1.24908e+06	796286	1.06843e+06	516705	942637	679842	956386
K.APQGEPNQRQDNEKIEPESVPESR.S	SLR0514	6.48818e-15	4	756.12994	1									9271.89	11912.3	10658	9801.68
K.APQPIIEAAIAELENPESHGYPPFEGTQSFR.Q	SLL0006	3.91884e-24	3	1180.5929	6	28282.8	2093.68	3207.83	3182.99	34873.5	23944.1	0	2654.74	53568.5	3366.05	12666	1788.11
K.APSTEEGM*ILDGPLFR.E	SLL1961	1.36926e-17	2	946.9821	6	80274.7	70003.8	80762.2	82383.8	47107.4	58534.9	73270.3	59517.8	64319.6	76664.9	35987	60789.4
K.APSTEEGMILDGPLFR.E	SLL1961	1.72465e-18	2	938.9837	9	114201	120891	137236	113243	111927	154239	152366	108466	146194	164737	93200.9	148121
K.APTILIDGDLNR.S	sll6093	3.71229e-14	2	721.4099	2	202644	90099.9	137634	114445	128203	111843	112574	72755.6
K.APTPPQPPVAK.A	slr0744	1.91765e-15	2	695.9171	16	2840.04	4938.26	5516.05	4039.98	611213	1.46475e+06	2.57955e+06	1.13721e+06	403208	709402	1.40293e+06	981823
K.APVHM*DDPGLTSR.L	slr0415	8.68628e-15	3	519.26	1									4125.96	7072.93	8137.55	8130.33
K.APVHMDDPGLTSR.L	slr0415	7.2935e-18	3	513.92834	4					80270.6	113811	205258	99461.6	118208	151803	520800	194473
K.APVLVSGTDGVGTK.L	slr0838	3.0794e-18	2	794.9602	2					23735.4	37316.5	48532	23469.5	25020.3	28496.6	23109.6	35049.4
K.APVLVSGTDGVGTKLK.I	slr0838	1.65333e-18	3	658.7361	1									67932	112943	186456	154193
K.APVQSREPVAKLEPTIGLEDLSDLF.-	SLR0145	9.68198e-10	3	1004.8904	1					2826.43	2794.04	6031.29	11871
K.AQAALDRGNEQLAR.E	SLR1188	1.05804e-17	3	552.96814	6					298070	542948	583643	577312	258533	456795	510445	397088
K.AQAEFFDEGGIFDK.V	slr1452	9.1803e-19	2	931.4637	2	44999.1	26852.6	44521.7	52066.4	71836.6	91756.1	140433	112627
K.AQAEFFDEGGIFDKVITK.I	slr1452	1.89029e-22	3	816.4446	5	40684.5	33027.5	56091.7	173138	52234.3	82908.5	117647	326726	13314.1	14007.5	30317.3	26400.7
K.AQAETNEM*KGHYLNVTAGTCEEM*M*K.R	slr0009	7.46342e-17	4	831.6392	26	94954.2	119472	60814.6	90674.4	21904.3	47660.1	36959	33219.1	11668.7	144524	36473.4	13535.9
K.AQAETNEM*KGHYLNVTAGTCEEM*M*KR.A	slr0009	6.90844e-15	4	870.4121	9	19845.4	32260.6	13053.2	20357.7	46643.4	39507.5	24839.1	37618.9	14400.2	26844.1	12789	20535.9
K.AQAETNEM*KGHYLNVTAGTCEEM*MK.R	slr0009	4.87155e-17	4	827.63947	11	17135.9	107971	64643.3	21623.5	20026.4	43090.8	27367	36916.8	47307.2	90600.8	64760.7	57393.1
K.AQAETNEM*KGHYLNVTAGTCEEM*MKR.A	slr0009	3.0542e-13	5	693.3341	1	23405	56201.1	31724.9	27642.2
K.AQAETNEM*KGHYLNVTAGTCEEMM*K.R	slr0009	1.96285e-17	4	827.6401	4	33275.4	64653.8	5467.83	34012.3	0	20240.7	0	18298.5	0	18176.9	10679.5	8871.35
K.AQAETNEM*KGHYLNVTAGTCEEMM*KR.A	slr0009	7.39388e-23	4	866.6645	4	26535.6	36204.8	20653.4	25509	15200	19537.8	13126.1	25505.1
K.AQAETNEM*KGHYLNVTAGTCEEMMK.R	slr0009	1.09057e-19	3	1097.8534	8	106337	109540	53580.4	87190	40305.1	58406.3	48811.1	39111.2	9258.85	15061.2	0	0
K.AQAETNEM*KGHYLNVTAGTCEEMMKR.A	slr0009	2.06321e-20	4	862.6669	5	70000.6	175813	45299.3	93312	39386.7	67003.1	20033.4	55920.1
K.AQAETNEMK.G	slr0009	2.90674e-13	2	655.33594	3	1164.05	689.4	1045.21	231.8	2590.87	1354.42	2508.19	697.7	2777.03	986.41	1771.47	2626.5
K.AQAETNEMKGHYLN.V	slr0009	4.21171e-15	2	947.46844	2					18837	46566.9	40120.8	56417	48959	94054.9	64240	60934.4
K.AQAETNEMKGHYLNVTAGT.C	slr0009	9.1731e-10	3	775.0569	1	11694.6	30226.3	10329.9	27892.8
K.AQAETNEMKGHYLNVTAGTCEEM*M*K.R	slr0009	6.52603e-16	4	827.64014	5	27813.1	39025	27780.4	22517.3	21818.6	80319.1	29993.7	83426	18942.1	105578	27726.6	26812.9
K.AQAETNEMKGHYLNVTAGTCEEM*M*KR.A	slr0009	3.95286e-15	4	866.66516	2	42440.6	76835.1	21977.4	54215.7
K.AQAETNEMKGHYLNVTAGTCEEM*MK.R	slr0009	1.49406e-17	4	823.6425	21	56113.5	215548	89520.8	132057	70967.9	301029	100229	310371	145049	305701	79230.1	140363
K.AQAETNEMKGHYLNVTAGTCEEM*MKR.A	slr0009	9.27204e-15	4	862.4157	5	22767.1	51872.3	31451.4	29352.8	48100.3	92995.1	55303.3	94441.4	43877.8	72231.5	19431	32511.6
K.AQAETNEMKGHYLNVTAGTCEEMM*K.R	slr0009	2.78551e-18	4	823.892	7	21751	212783	124375	45490.8	0	117148	68275.1	39807.6	62397.6	210756	72462.3	80767.2
K.AQAETNEMKGHYLNVTAGTCEEMMK.R	slr0009	4.56307e-21	3	1092.5226	27	294153	717400	367362	515395	144684	582447	225237	335653	708897	963752	371714	592784
K.AQAETNEMKGHYLNVTAGTCEEMMKR.A	slr0009	7.63814e-24	5	687.1352	9	150447	250266	113483	130158	104143	177454	20077.9	205845	85300.9	124205	68547.5	62450.1
K.AQAFVSK.V	SLL1831	2.4626e-10	2	519.8124	1	2874.37	6142.96	5216.01	4003.97
K.AQAIDLSIK.L	SLR1590	2.59583e-11	2	623.8826	3					681445	468465	695069	250772	30844.5	34832	21294.5	31663.9
K.AQALEYYQQALELAR.L	SLL0499	7.17353e-19	2	956.0094	2	163604	47828.1	64600.7	98684.4
K.AQALQQAQIR.M	SLR0380	8.27647e-13	2	635.8721	2	10961.4	6805.89	9811.83	5242.07
K.AQDALNLDSR.Y	sll0837	3.19356e-12	2	623.8291	3					28529.6	34890.9	52734.4	60995	75004.2	95838.5	188575	101421
K.AQDFALVVPVPVVLQEDQVNVGER.K	SLR1173	1.86616e-22	3	922.50476	8	12426.6	9965.89	12585.4	2502.74	9032.32	9034.23	8012.34	6442.7	18314.5	21938.4	29541.3	12461.8
K.AQDFALVVPVPVVLQEDQVNVGERK.I	SLR1173	4.55218e-21	3	1013.2356	1	7488.95	13981.7	9422.4	12825.4
K.AQDHLDWHPNYGLVEGLK.N	SLR1540	3.51722e-24	3	794.08	13	365274	444701	286024	323436	216208	455645	134551	227786	35615.1	39459.4	20173.8	23047.8
K.AQDYAGALSGGQR.K	slr0467	3.23206e-15	2	719.36285	1									179208	255798	188370	244830
K.AQDYAGALSGGQRK.L	slr0467	5.75772e-15	3	570.6432	2					50958.2	84363.1	100970	83341.2	42417.8	63801.9	53135.8	63008
K.AQEAIDVGDVEK.L	slr1531	9.43666e-16	2	781.4182	1					83802	123641	154266	65522.8
K.AQEAIDVGDVEKLQNK.I	slr1531	2.61746e-20	2	1095.1083	3	42109.1	96194.2	68443.6	51022.1	5509.41	9830.93	8537.37	7697.53	262572	357752	161645	231078
K.AQELTLLNQEMQNLGIEFK.K	SLR0869	2.3419e-22	2	1254.1787	5	1746.61	8779.73	6205.72	6823.55	2646.64	5959.62	1427.62	2466.57	8368.31	14722.6	7883.65	11678.2
K.AQENPDMPLVGR.T	SLL1294	3.23883e-16	2	735.8757	1					316242	545433	1.24438e+06	513317
K.AQETLQLQDLMGNITELK.Q	slr0357	4.60805e-20	3	778.4269	1									12756.6	10722.1	13211.3	7569.66
K.AQEVLAYGNQPTFMTQDLAQLGGK.Y	slr0525	3.48896e-20	3	956.8334	1					10259.2	12950.6	15250.7	13302.3
K.AQFDPALMPLIIGVGDTVTSQVDEATGEIRR.G	slr0746	7.81567e-10	3	1148.2761	1	1962.5	2999.22	0	1633.63
K.AQFGDGEIDYR.H	SLR1855	3.88089e-15	2	707.83856	5	8.98944e+06	8.23351e+06	17428.6	9.37012e+06	2552581	2.43423e+06	71652.6	1.86639e+06
K.AQGFNPDVVIANPGWGESLFVK.D	SLL1466	6.94192e-26	2	1317.204	4	17684.8	8711.35	15853.1	6121.69	5150.5	5822.43	3443.35	2280.48	6635.05	6825.97	2617.15	7006.34
K.AQGGELVLQK.E	SLR1106	7.85909e-13	2	665.89935	4					65191.5	122781	207608	74269.8	1.75055e+06	3.29209e+06	4223380	3.4883e+06
K.AQGISLVPISAFR.T	SLL0034	4.40771e-14	2	751.9456	4	40620.8	50798.3	66164.3	47163.5	133193	226931	379822	226134	122002	162833	201297	165599
K.AQGVYVVCDGM*GGHAAGEVASQM*GVK.T	SLL1033	2.23979e-20	3	966.7968	3	44528.1	42185.4	64581.6	48486.7
K.AQGVYVVCDGMGGHAAGEVASQM*GVK.T	SLL1033	6.81898e-10	3	961.46484	1	17351	20184.8	19791.5	26429.8
K.AQIGLDSGLTK.E	SLR0586	9.1091e-14	2	695.91003	3					187024	182152	173566	119709	151170	151325	125754	144133
K.AQIGLDSGLTKEQTEEFVAIR.N	SLR0586	4.32807e-13	2	1297.2056	3	50096.8	99843.6	134192	143486	0	0	1217.11	1361.55	34654.4	35762.7	53279.1	44267.1
K.AQIILLPYDPEAYAER.T	SLL0085	2.93439e-10	2	1003.5396	1									9754.89	8248.3	4214.96	6728.62
K.AQKDDPAYVEQINGYLK.K	SLR0201	5.31008e-12	3	795.75946	3	90412.4	113172	82613	79928	31207.2	56772.3	69269.8	43360.6	46750.4	73237.7	76418.5	55629.1
K.AQKDDPAYVEQINGYLKK.E	SLR0201	1.45516e-14	3	886.4906	4	56812.2	78875.4	64547.2	96421.4	24097.9	29803.5	22844.7	30845.7	21658.6	36078.9	19847.8	23534.6
[truncated: 20,013 more rows]
